# Supplementary material for: Palladium-catalyzed C–H olefination of uridine, deoxyuridine, uridine monophosphate and uridine analogues
Source: Royal Society of Chemistry journal article supplement (doi:10.1039/d2ra03681a), 2022-01-01

## *Supporting Information*

### **Palladium-catalyzed C–H Olefination of Uridine, Deoxyuridine, Uridine Monophosphate and Uridine Analogues**

Qin Zhao, Ruoqian Xie, Yuxiao Zeng, Wanlu Li, Guolan Xiao, Yangyan Li and Gang Chen

#### **Table of Contents**

|                                                                               |    |
|-------------------------------------------------------------------------------|----|
| <b>1. General information</b> .....                                           | 2  |
| <b>2. Details for the direct C–H olefinations</b> .....                       | 3  |
| <b>2.1 Optimization of C–H olefinations</b> .....                             | 3  |
| Table S1. Oxidant screening.....                                              | 3  |
| Table S2. Solvent screening .....                                             | 4  |
| Table S3. Additive screening .....                                            | 5  |
| Table S4. Ligand screening.....                                               | 6  |
| Table S5. Atmosphere screening .....                                          | 7  |
| Table S6. Temperature and Time screening .....                                | 7  |
| <b>2.2. Substrate scope</b> .....                                             | 8  |
| Table S7. Substrate scope of the uridines .....                               | 8  |
| Table S8. Substrate scope of the alkenes.....                                 | 9  |
| <b>2.3 General procedure</b> .....                                            | 9  |
| <b>3. Characterization data for compounds 3aa-3ia, 3ab-3aj, 3bb-3bj</b> ..... | 10 |
| <b>3.1 Applications of the methodology</b> .....                              | 22 |
| a) Gram scale preparation of 3aa .....                                        | 22 |
| b) On-water reaction <sup>a</sup> .....                                       | 22 |
| c) Derivative of 3aj <sup>[12, 13]</sup> .....                                | 23 |
| <b>4. References</b> .....                                                    | 25 |
| <b>5. NMR Spectra</b> .....                                                   | 26 |

---

## 1. General information

All the chemicals were purchased commercially and used without further purification. General reagents were obtained from Adamas, Leyan, Innochem, Laajoo and Bidepharm. Anhydrous solvents were obtained from J&K. Analytical thin layer chromatography was performed on 0.25 mm silica gel 60-F254. Visualization was carried out with UV light and Vogel's permanganate.  $^1\text{H}$  NMR spectra were recorded on Bruker-400 MHz and Bruker-500 MHz instruments. When the  $^1\text{H}$  NMR solvent was DMSO-*d*-6, chemical shifts were quoted in parts per million (ppm) referenced to 2.50 ppm for solvent DMSO-*d*-6. When the  $^1\text{H}$  NMR solvent was Methanol-*d*-4, chemical shifts were quoted in parts per million (ppm) referenced to 3.31 ppm for solvent Methanol-*d*-4. When the  $^1\text{H}$  NMR solvent was D<sub>2</sub>O, chemical shifts were quoted in parts per million (ppm) referenced to 4.79 ppm for solvent D<sub>2</sub>O. The following abbreviations (or combinations thereof) were used to explain multiplicities: s = singlet, d = doublet, t = triplet, q = quartet, m = multiple, dd = double doublet, dt = double triplet. Coupling constants, *J*, were reported in Hertz unit (Hz).  $^{13}\text{C}$  NMR spectra were recorded on Bruker-400 instrument (101 MHz) and Bruker-500 instrument (126 MHz), and were fully decoupled by broad band proton decoupling. When the  $^{13}\text{C}$  NMR solvent was DMSO-*d*-6, chemical shifts were quoted in parts per million (ppm) referenced to 39.52 ppm for solvent DMSO-*d*-6. When the  $^{13}\text{C}$  NMR solvent was Methanol-*d*-4, chemical shifts were quoted in parts per million (ppm) referenced to 49.00 ppm for solvent Methanol-*d*-4. Reverse-phase column chromatography was performed on SepaBean<sup>®</sup> machine T from Santai Technologies in Changzhou, China, using ODS 45-60 mm C18 Spherical silica. The high-resolution mass spectra (HRMS) were recorded on an Agilent Mass spectrometer using ESI-TOF (electrospray ionization-time of flight). Optical rotations were measured on an Anton Paar MCP100 automatic polarimeter using a 100 mm path-length cell at 589 nm. Melting points were measured with microscope WRX-4 (Shanghai Yice).

## 2. Details for the direct C–H olefinations

### 2.1 Optimization of C–H olefinations

Table S1. Oxidant screening

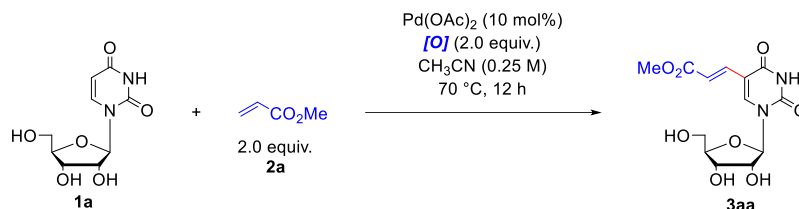

| Entry <sup>a</sup> | [O]                                                           | Yield <sup>b</sup> of <b>3aa</b> | Recovery <sup>b</sup> of <b>1a</b> |
|--------------------|---------------------------------------------------------------|----------------------------------|------------------------------------|
| 1                  | PhCO <sub>3</sub> tBu                                         | 24%                              | 31%                                |
| 2                  | MeCO <sub>3</sub> tBu                                         | 37%                              | 60%                                |
| 3                  | DTBP                                                          | 13%                              | 85%                                |
| 4                  | TBHP                                                          | 20%                              | 73%                                |
| 5                  | PhI(OAc) <sub>2</sub>                                         | 14%                              | 43%                                |
| 6                  | Oxone                                                         | 9%                               | 78%                                |
| 7                  | DLP                                                           | 1%                               | 93%                                |
| 8                  | Benzoquinone                                                  | 1%                               | 23%                                |
| 9                  | <i>m</i> -CPBA                                                | 0%                               | 23%                                |
| 10                 | (NH <sub>4</sub> ) <sub>2</sub> S <sub>2</sub> O <sub>8</sub> | 9%                               | 5%                                 |
| 11                 | H <sub>2</sub> O <sub>2</sub>                                 | 8%                               | 91%                                |
| 12                 | Cu(OAc) <sub>2</sub>                                          | 0%                               | 100%                               |
| 13                 | CaOTf                                                         | 0%                               | 97%                                |
| 14                 | AgOAc                                                         | 2%                               | 97%                                |

<sup>a</sup> Conditions: uridine **1a** (0.1 mmol), methyl acrylate **2a** (0.2 mmol), Pd(OAc)<sub>2</sub> (0.01 mmol), oxidant (0.2 mmol), CH<sub>3</sub>CN (0.4 mL) under air at 70 °C for 12 hours. <sup>b</sup> Yields and recovery were determined by LC-MS.

**Table S2. Solvent screening**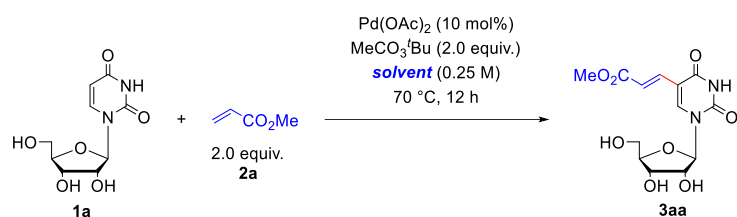

| Entry <sup>a</sup> | Solvent                            | Yield <sup>b</sup> of <b>3aa</b> | Recovery <sup>b</sup> of <b>1a</b> |
|--------------------|------------------------------------|----------------------------------|------------------------------------|
| <b>1</b>           | CH <sub>3</sub> CN                 | 37%                              | 60%                                |
| <b>2</b>           | Benzonitrile                       | 2%                               | 42%                                |
| <b>3</b>           | H <sub>2</sub> O                   | 2%                               | 98%                                |
| <b>4</b>           | MeOH                               | < 1%                             | 82%                                |
| <b>5</b>           | CH <sub>3</sub> CH <sub>2</sub> OH | 0%                               | 83%                                |
| <b>6</b>           | <i>t</i> -BuOH                     | 6%                               | 61%                                |
| <b>7</b>           | <i>t</i> -AmlyOH                   | 6%                               | 69%                                |
| <b>8</b>           | Glycol                             | 0%                               | 98%                                |
| <b>9</b>           | Pyridine                           | 0%                               | 100%                               |
| <b>10</b>          | DMSO                               | 7%                               | 91%                                |
| <b>11</b>          | DMA                                | 18%                              | 77%                                |
| <b>12</b>          | HFIP                               | 17%                              | 72%                                |
| <b>13</b>          | CF <sub>3</sub> CH <sub>2</sub> OH | 2%                               | 76%                                |
| <b>14</b>          | CH <sub>3</sub> COOH               | 59%                              | 24%                                |
| <b>15</b>          | HCl                                | 27%                              | 0%                                 |
| <b>16</b>          | THF                                | 2%                               | 47%                                |
| <b>17</b>          | Dioxane                            | 16%                              | 75%                                |
| <b>18</b>          | Toluene                            | 0%                               | 44%                                |
| <b>19</b>          | Cyclohexane                        | 0%                               | 100%                               |
| <b>20</b>          | DCE                                | 0%                               | 99%                                |

<sup>a</sup> Conditions: uridine **1a** (0.1 mmol), methyl acrylate **2a** (0.2 mmol), Pd(OAc)<sub>2</sub> (0.01 mmol), MeCO<sub>3</sub><sup>t</sup>Bu (0.2 mmol), solvent (0.4 mL) under air at 70 °C for 12 hours. <sup>b</sup> Yields and recovery were determined by LC-MS.

**Table S3. Additive screening**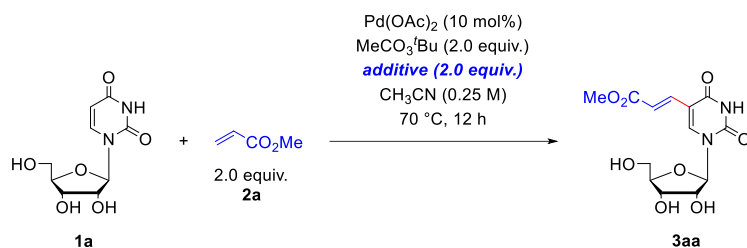

| Entry <sup>a</sup> | Additive                                                                       | Yield <sup>b</sup> of <b>3aa</b> | Recovery <sup>b</sup> of <b>1a</b> |
|--------------------|--------------------------------------------------------------------------------|----------------------------------|------------------------------------|
| 1                  | AcOH                                                                           | 62%                              | 26%                                |
| 2                  | CH <sub>3</sub> CH <sub>2</sub> C(CH <sub>3</sub> ) <sub>2</sub> COOH          | 76%                              | 13%                                |
| 3                  | (CH <sub>3</sub> ) <sub>2</sub> CHCOOH                                         | 75%                              | 22%                                |
| 4                  | <i>p</i> -CF <sub>3</sub> (C <sub>6</sub> H <sub>4</sub> )CH <sub>2</sub> COOH | 42%                              | 35%                                |
| 5                  | PivOH                                                                          | 82%                              | 16%                                |
| 6                  | TFA                                                                            | 2%                               | 80%                                |
| 7                  | HFIP                                                                           | 28%                              | 69%                                |
| 8                  | HCl                                                                            | 8%                               | 60%                                |
| 9                  | K <sub>2</sub> CO <sub>3</sub>                                                 | 1%                               | 99%                                |
| 10                 | Li <sub>2</sub> CO <sub>3</sub>                                                | 0%                               | 100%                               |
| 11                 | Cs <sub>2</sub> CO <sub>3</sub>                                                | 0%                               | 100%                               |
| 12                 | KH <sub>2</sub> PO <sub>4</sub>                                                | 14%                              | 83%                                |
| 13                 | K <sub>2</sub> HPO <sub>4</sub>                                                | 13%                              | 61%                                |
| 14                 | NaHCO <sub>3</sub>                                                             | 1%                               | 99%                                |
| 15                 | NaH <sub>2</sub> PO <sub>4</sub>                                               | 17%                              | 80%                                |
| 16                 | LiF                                                                            | 0%                               | 98%                                |
| 17                 | CsF                                                                            | 0%                               | 100%                               |
| 18                 | MgCl <sub>2</sub>                                                              | 0%                               | 100%                               |

<sup>a</sup> Conditions: uridine **1a** (0.1 mmol), methyl acrylate **2a** (0.2 mmol), Pd(OAc)<sub>2</sub> (0.01 mmol), MeCO<sub>3</sub><sup>t</sup>Bu (0.2 mmol), additive (0.2 mmol), CH<sub>3</sub>CN (0.4 mL) under air at 70 °C for 12 hours. <sup>b</sup> Yields and recovery were determined by LC-MS.

**Table S4. Amino acid and pyridine ligand screening**

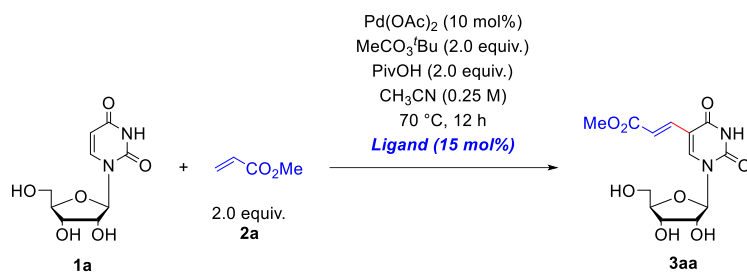

| Entry <sup>a</sup> | ligand     | Yield <sup>b</sup> of <b>3aa</b> | Recovery <sup>b</sup> of <b>1a</b> |
|--------------------|------------|----------------------------------|------------------------------------|
| <b>1</b>           | -          | 79%                              | 18%                                |
| <b>2</b>           | Ac-Leu-OH  | 51%                              | 10%                                |
| <b>3</b>           | Ac-Gly-OH  | 67%                              | 22%                                |
| <b>4</b>           | Ac-Val-OH  | 78%                              | 14%                                |
| <b>5</b>           | Ac-Pro-OH  | 70%                              | 24%                                |
| <b>6</b>           | Ac-Phe-OH  | 60%                              | 27%                                |
| <b>7</b>           | Ac-Cys-OH  | 5%                               | 93%                                |
| <b>8</b>           | Z-Phe-OH   | 28%                              | 72%                                |
| <b>9</b>           | Z-Ala-OH   | 64%                              | 25%                                |
| <b>10</b>          | Z-Gly-OH   | 63%                              | 27%                                |
| <b>11</b>          | Boc-Gly-OH | 64%                              | 26%                                |
| <b>12</b>          | Boc-Phe-OH | 35%                              | 61%                                |
| <b>13</b>          | Boc-Leu-OH | 74%                              | 14%                                |

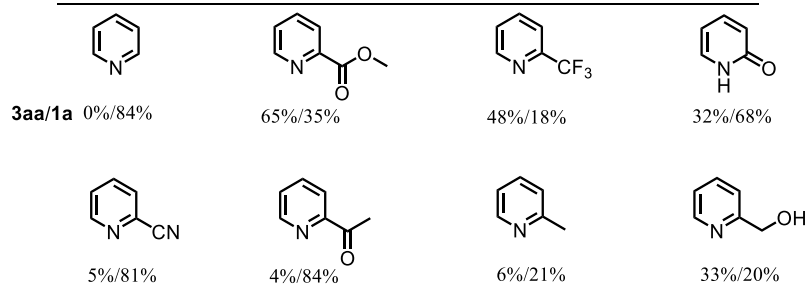

<sup>a</sup> Conditions: uridine **1a** (0.1 mmol), methyl acrylate **2a** (0.2 mmol), Pd(OAc)<sub>2</sub> (0.01 mmol), MeCO<sub>3</sub><sup>t</sup>Bu (0.2 mmol), PivOH (0.2 mmol), CH<sub>3</sub>CN (0.4 mL), Ligand (0.015 mmol) under air at 70 °C for 12 hours.

**Table S5. Atmosphere screening**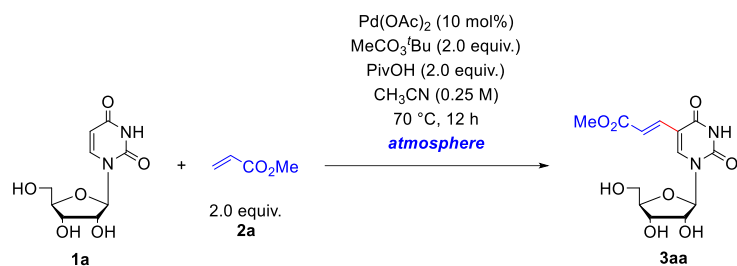

| Entry <sup>a</sup>   | Atmosphere     | Yield <sup>d</sup> of <b>3aa</b> | Recovery <sup>d</sup> of <b>1a</b> |
|----------------------|----------------|----------------------------------|------------------------------------|
| <b>1</b>             | air            | 82%                              | 15%                                |
| <b>2<sup>b</sup></b> | Ar             | 21%                              | 79%                                |
| <b>3<sup>c</sup></b> | O <sub>2</sub> | 83%                              | 11%                                |

<sup>a</sup> Conditions: uridine **1a** (0.1 mmol), methyl acrylate **2a** (0.2 mmol), Pd(OAc)<sub>2</sub> (0.01 mmol), MeCO<sub>3</sub><sup>t</sup>Bu (0.2 mmol), PivOH (0.2 mmol), CH<sub>3</sub>CN (0.4 mL) under air at 70 °C for 12 hours. <sup>b</sup> The reaction was carried out under an argon atmosphere. <sup>c</sup> The reaction was carried out under an oxygen atmosphere. <sup>d</sup> Yields and recovery were determined by LC-MS.

**Table S6. Temperature and Time screening**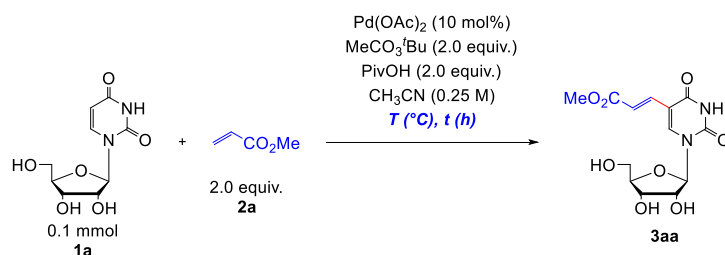

| Entry <sup>a</sup> | T (°C) | t (h) | Yield <sup>b</sup> of <b>3aa</b> | Recovery <sup>b</sup> of <b>1a</b> |
|--------------------|--------|-------|----------------------------------|------------------------------------|
| <b>1</b>           | 60     | 12    | 40                               | 54                                 |
| <b>2</b>           | 70     | 3     | 62                               | 38                                 |
| <b>3</b>           | 70     | 6     | 79                               | 18                                 |
| <b>4</b>           | 70     | 12    | 82                               | 15                                 |
| <b>5</b>           | 70     | 16    | 82                               | 6                                  |
| <b>6</b>           | 80     | 12    | 83                               | 4                                  |
| <b>7</b>           | 90     | 12    | 83                               | 1                                  |

<sup>a</sup> Conditions: uridine **1a** (0.1 mmol), methyl acrylate **2a** (0.2 mmol), Pd(OAc)<sub>2</sub> (0.01 mmol), MeCO<sub>3</sub><sup>t</sup>Bu (0.2 mmol), PivOH (0.2 mmol), CH<sub>3</sub>CN (0.4 mL) under air. <sup>b</sup> Yields and recovery were determined by LC-MS.

## 2.2. Substrate scope

Table S7. Substrate scope of the uridines

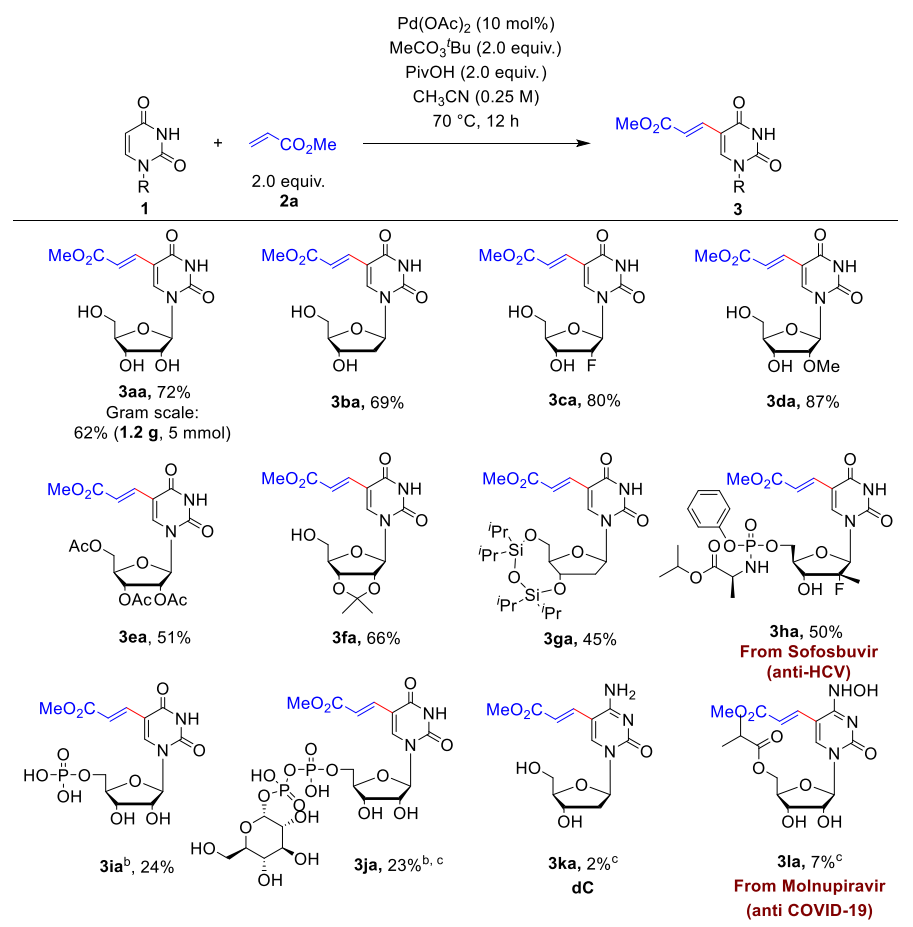

<sup>a</sup> Conditions: uracil-based nucleosides/nucleotides **1** (0.1 mmol), methyl acrylate **2a** (2.0 equiv.), Pd(OAc)<sub>2</sub> (10 mol%), CH<sub>3</sub>CO<sub>2</sub><sup>t</sup>Bu (2.0 equiv.), PivOH (2.0 equiv.), CH<sub>3</sub>CN (0.4 mL) under air at 70 °C for 12 hours. <sup>b</sup> Mixed solvents of CH<sub>3</sub>CN and H<sub>2</sub>O (10:1, v/v) was used. <sup>c</sup> Yield determined by LC-MS and compound not isolated.



**Table S8. Substrate scope of the alkenes**

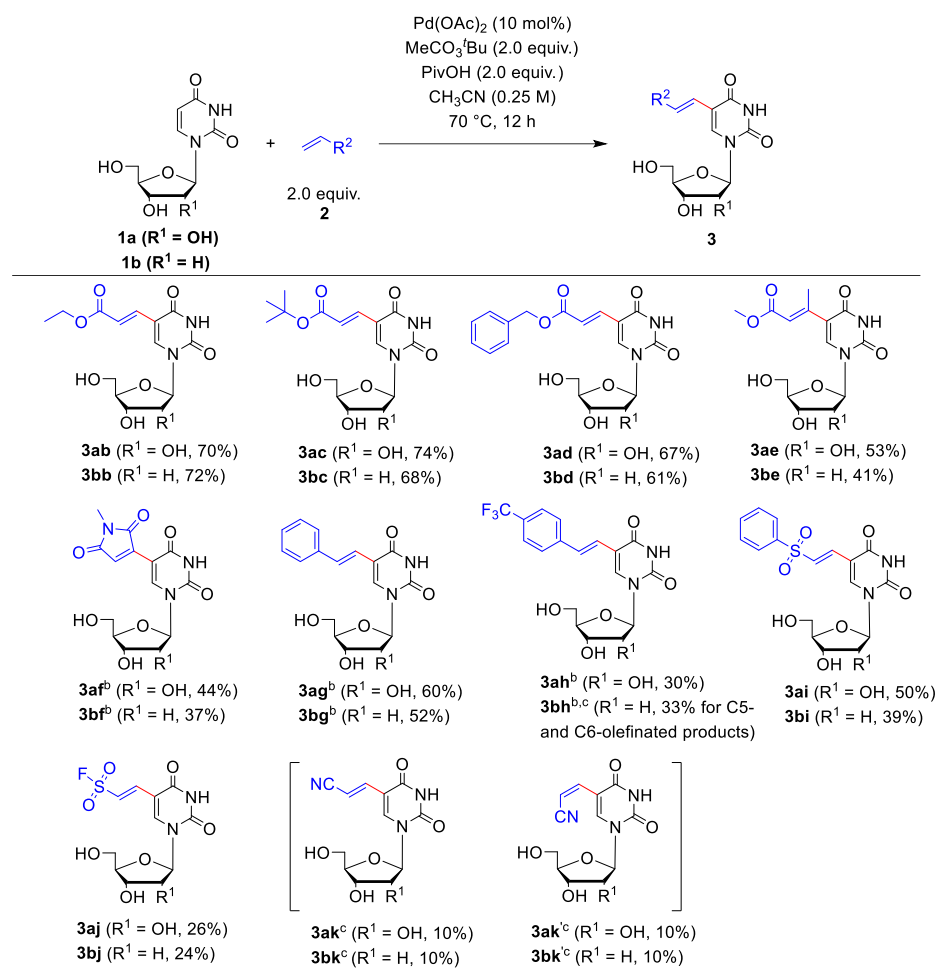

<sup>a</sup> Conditions: uridine **1a** or 2'-deoxyuridine **1b** (0.1 mmol), olefins **2** (2.0 equiv.),  $\text{Pd(OAc)}_2$  (10 mol%),  $\text{CH}_3\text{CO}_3^t\text{Bu}$  (2.0 equiv.),  $\text{PivOH}$  (2.0 equiv.),  $\text{CH}_3\text{CN}$  (0.4 mL) under air at  $70^\circ\text{C}$  for 12 hours. <sup>b</sup> The reaction was carried out under  $\text{O}_2$  at  $90^\circ\text{C}$  for 12 hours. <sup>c</sup> Yield determined by LC-MS and compound not isolated. Isolated yield.

## 2.3 General procedure

**General procedure A (0.1 mmol scale):** A 10 mL reaction tube was charged with substrate **1a-1h** (0.1mmol, 1.0 equiv.),  $\text{Pd(OAc)}_2$  (2.2 mg, 0.01 mmol, 10 mol%),  $\text{CH}_3\text{CO}_3^t\text{Bu}$  (64  $\mu\text{L}$ , 0.2 mmol, 2.0 equiv.) (50% solution in aromatic free mineral spirit),  $\text{PivOH}$  (20.4 mg, 0.2 mmol, 2.0 equiv.) and **2a-2j** (0.2 mmol, 2.0 equiv.), then 0.4 mL  $\text{CH}_3\text{CN}$  was added to dissolved the above mixture. The tube was sealed and the reaction mixture was then placed to a pre-heated oil bath to stir at  $70^\circ\text{C}$  for 12 h. The reaction mixture was then cooled to room temperature. It was filtered through a pad of celite and washed with methanol. The filtrate was concentrated under reduced pressure and the residue was purified by PTLC (preparative TLC) ( $\text{CH}_2\text{Cl}_2:\text{MeOH} = 25:1$  to  $10:1$ ) or reverse-phase column chromatography (C18 Spherical silica) ( $\text{MeOH}:\text{H}_2\text{O} = 0:1$  to

1:1) to give the pure products **3aa-3ia**, **3ab-3aj**, **3bb-3bj**.

### 3. Characterization data for compounds **3aa-3ia**, **3ab-3aj**, **3bb-3bj**

**Methyl(*E*)-3-(1-((2*R*,3*R*,4*S*,5*R*)-3,4-dihydroxy-5-(hydroxymethyl)tetrahydrofuran-2-yl)-2,4-dioxo-1,2,3,4-tetrahydropyrimidin-5-yl)acrylate (**3aa**)**<sup>[1]</sup>

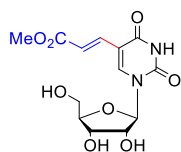

**3aa** was obtained following the general procedure **A** from **1a**. After purification by PTLC (preparative TLC) using CH<sub>2</sub>Cl<sub>2</sub>/MeOH (10/1) as the eluent, **3aa** was obtained as a yellow solid (23.6 mg, 72%), gram scale (5 mmol, 1.02 g, 62%). mp 180.7-182.6 °C;  $[\alpha]_D^{25}$  -41.58 (c 0.670, MeOH); <sup>1</sup>H NMR (400 MHz, DMSO) δ 11.69 (s, 1H), 8.50 (s, 1H), 7.34 (d, *J* = 16.0 Hz, 1H), 6.84 (d, *J* = 15.6 Hz, 1H), 5.76 (d, *J* = 4.0 Hz, 1H), 5.46 (d, *J* = 4.0 Hz, 1H), 5.31 (t, *J* = 5.0 Hz, 1H), 5.09 (d, *J* = 3.6 Hz, 1H), 4.10–4.04 (m, 1H), 4.04–3.97 (m, 1H), 3.90–3.84 (m, 1H), 3.76–3.69 (m, 1H), 3.68 (s, 3H), 3.63–3.56 (m, 1H). <sup>13</sup>C NMR (126 MHz, DMSO) δ 167.2, 161.8, 149.5, 144.0, 138.0, 116.2, 108.2, 88.6, 84.6, 73.9, 69.0, 60.2, 51.3. HRMS-ESI *m/z* calcd for C<sub>13</sub>H<sub>16</sub>N<sub>2</sub>NaO<sub>8</sub> [M+Na]<sup>+</sup> 351.0799; found 351.0798.

**Methyl (*E*)-3-(1-((2*R*,4*S*,5*R*)-4-hydroxy-5-(hydroxymethyl)tetrahydrofuran-2-yl)-2,4-dioxo-1,2,3,4-tetrahydropyrimidin-5-yl)acrylate (**3ba**)**<sup>[2]</sup>

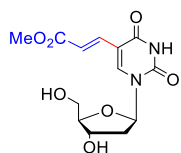

**3ba** was obtained following the general procedure **A** from **1b**. After purification by PTLC (preparative TLC) using CH<sub>2</sub>Cl<sub>2</sub>/MeOH (12/1) as the eluent, **3ba** was obtained as a yellow solid (19.6mg, 69%). mp 97.3-100.5 °C;  $[\alpha]_D^{25}$  -1.86 (c 0.700, MeOH); <sup>1</sup>H NMR (400 MHz, DMSO) δ 11.63 (s, 1H), 8.42 (s, 1H), 7.37 (d, *J* = 15.6 Hz, 1H), 6.85 (d, *J* = 15.6 Hz, 1H), 6.13 (t, *J* = 6.4 Hz, 1H), 5.26 (d, *J* = 4.4 Hz, 1H), 5.17 (t, *J* = 5.2 Hz, 1H), 4.28–4.23 (m, 1H), 3.83–3.77 (m, 1H), 3.68 (s, 3H), 3.67–3.62 (m, 1H), 3.61–3.54 (m, 1H), 2.24–2.10 (m, 2H). <sup>13</sup>C NMR (101 MHz, MeOD) δ 169.7, 163.6, 151.1, 144.8, 138.8, 118.4, 110.4, 89.2, 87.1, 71.7, 62.4, 52.0, 41.9. HRMS-ESI *m/z* calcd for C<sub>13</sub>H<sub>16</sub>N<sub>2</sub>NaO<sub>7</sub> [M+Na]<sup>+</sup> 335.0850; found 335.0852.

**Methyl(*E*)-3-(1-((2*R*,3*R*,4*R*,5*R*)-3-fluoro-4-hydroxy-5-(hydroxymethyl)tetrahydrofuran-2-yl)-2,4-dioxo-1,2,3,4-tetrahydropyrimidin-5-yl)acrylate (**3ca**)**

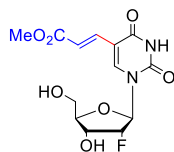

**3ca** was obtained following the general procedure **A** from **1c** on 0.1 mmol scale. After purification by PTLC (preparative TLC) using CH<sub>2</sub>Cl<sub>2</sub>/MeOH (15/1) as the eluent, **3ca** was obtained as a faint yellow solid (26.4 mg, 80%). mp 142.7-144.4 °C; [ $\alpha$ ]<sub>D</sub><sup>25</sup> -58.49 (c 0.330, MeOH); <sup>1</sup>H NMR (400 MHz, DMSO)  $\delta$  11.71 (s, 1H), 8.53 (s, 1H), 7.31 (d, *J* = 16.0 Hz, 1H), 6.81 (d, *J* = 16.0 Hz, 1H), 5.89 (d, *J* = 16.8 Hz, 1H), 5.64 (d, *J* = 6.4 Hz, 1H), 5.49 (t, *J* = 4.4 Hz, 1H), 5.06 (dd, *J* = 52.8, 4.0 Hz, 1H), 4.26–4.11 (m, 1H), 3.95–3.81 (m, 2H), 3.70–3.60 (m, 4H). <sup>19</sup>F NMR (376 MHz, DMSO)  $\delta$  -202.05. <sup>13</sup>C NMR (101 MHz, DMSO)  $\delta$  167.2, 161.9, 149.1, 143.5, 138.0, 116.2, 108.0, 93.8 (d, *J* = 184.3 Hz), 87.6 (d, *J* = 29.9 Hz), 83.1, 66.7 (d, *J* = 16.2 Hz), 58.7, 51.4. HRMS-ESI *m/z* calcd for C<sub>13</sub>H<sub>15</sub>FN<sub>2</sub>NaO<sub>7</sub> [M+Na]<sup>+</sup> 353.0755; found 353.0756.

**Methyl(*E*)-3-(1-((2*R*,3*R*,4*R*,5*R*)-4-hydroxy-5-(hydroxymethyl)-3-methoxytetrahydrofuran-2-yl)-2,4-dioxo-1,2,3,4-tetrahydropyrimidin-5-yl)acrylate (**3da**)** <sup>[3]</sup>

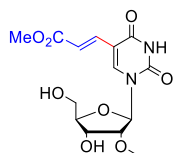

**3da** was obtained following the general procedure **A** from **1d** on 0.2 mmol scale. After purification by reverse-phase column chromatography (C18 Spherical silica) using MeOH/H<sub>2</sub>O as the eluent, **3da** was obtained as a white solid (59.5 mg, 87%). mp 214.7-217.3 °C; [ $\alpha$ ]<sub>D</sub><sup>25</sup> -13.524 (c 0.175, MeOH); <sup>1</sup>H NMR (400 MHz, DMSO)  $\delta$  11.69 (s, 1H), 8.55 (s, 1H), 7.32 (d, *J* = 16.0 Hz, 1H), 6.83 (d, *J* = 16.0 Hz, 1H), 5.83 (d, *J* = 3.6 Hz, 1H), 5.42 (brs, 1H), 5.20 (d, *J* = 5.6 Hz, 1H), 4.20–4.10 (m, 1H), 3.90–3.81 (m, 2H), 3.74 (d, *J* = 12.0 Hz, 1H), 3.67 (s, 3H), 3.61 (d, *J* = 12.0 Hz, 1H), 3.39 (s, 3H). <sup>13</sup>C NMR (101 MHz, DMSO)  $\delta$  167.2, 149.4, 143.7, 138.0, 116.2, 108.2, 86.8, 84.8, 83.0, 67.6, 59.7, 57.7, 51.3. HRMS-ESI *m/z* calcd for C<sub>14</sub>H<sub>18</sub>N<sub>2</sub>NaO<sub>8</sub> [M+Na]<sup>+</sup> 365.0955; found 365.0956.

**(2*R*,3*R*,4*R*,5*R*)-2-(acetoxymethyl)-5-(5-((*E*)-3-methoxy-3-oxoprop-1-en-1-yl)-2,4-dioxo-3,4-dihydropyrimidin-1(2*H*)-yl)tetrahydrofuran-3,4-diyl diacetate (**3ea**)**

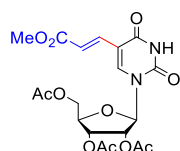

**3ea** was obtained following the general procedure **A** from **1e** on 0.2 mmol scale. After purification by PTLC (preparative TLC) using petroleum ether/ethyl acetate (2/3) as the eluent, **3ea** was obtained as a beige solid (46.5 mg, 51%). mp 104.2-106.6 °C;  $[\alpha]_D^{25}$  -41.80 (c 0.500, MeOH);  $^1\text{H NMR}$  (400 MHz, MeOD)  $\delta$  8.03 (s, 1H), 7.38 (d,  $J = 16.0$  Hz, 1H), 6.94 (d,  $J = 16.0$  Hz, 1H), 5.94 (d,  $J = 4.4$  Hz, 1H), 5.56–5.49 (m, 1H), 5.43 (t,  $J = 5.8$  Hz, 1H), 4.45–4.33 (m, 3H), 3.75 (s, 3H), 2.13–2.08 (m, 9H).  $^{13}\text{C NMR}$  (101 MHz, MeOD)  $\delta$  172.2, 171.4, 171.3, 169.5, 163.3, 150.8, 145.1, 138.4, 119.4, 111.0, 91.0, 81.4, 74.5, 71.4, 64.0, 52.1, 20.8, 20.4, 20.3. HRMS-ESI  $m/z$  calcd for  $\text{C}_{19}\text{H}_{22}\text{N}_2\text{NaO}_{11}$   $[\text{M}+\text{Na}]^+$  477.1116; found 477.1113.

**Methyl(*E*)-3-(1-((3*aR*,4*R*,6*R*,6*aR*)-6-(hydroxymethyl)-2,2-dimethyltetrahydrofuro[3,4-*d*][1,3]dioxol-4-yl)-2,4-dioxo-1,2,3,4-tetrahydropyrimidin-5-yl)acrylate (**3fa**)**

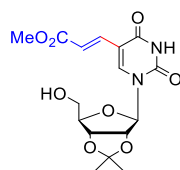

**3fa** was obtained following the general procedure **A** from **1f** on 0.1 mmol scale. After purification by PTLC (preparative TLC) using  $\text{CH}_2\text{Cl}_2/\text{MeOH}$  (22/1) as the eluent, **3fa** was obtained as a white solid (24.2 mg, 66%). mp 179.8-183.4 °C;  $[\alpha]_D^{25}$  -40.36 (c 0.280, MeOH);  $^1\text{H NMR}$  (400 MHz, DMSO)  $\delta$  11.74 (s, 1H), 8.35 (s, 1H), 7.34 (d,  $J = 16.0$  Hz, 1H), 6.85 (d,  $J = 16.0$  Hz, 1H), 5.85 (d,  $J = 2.4$  Hz, 1H), 5.24 (t,  $J = 5.2$  Hz, 1H), 4.95 (dd,  $J = 6.4, 2.4$  Hz, 1H), 4.77 (dd,  $J = 6.4, 3.6$  Hz, 1H), 4.15–4.11 (m, 1H), 3.68 (s, 3H), 3.67–3.61 (m, 1H), 3.60–3.53 (m, 1H), 1.49 (s, 3H), 1.29 (s, 3H).  $^{13}\text{C NMR}$  (101 MHz, DMSO)  $\delta$  167.1, 161.8, 149.2, 145.0, 137.9, 116.4, 112.9, 108.2, 91.4, 87.1, 84.1, 80.2, 61.1, 51.3, 27.0, 25.2. HRMS-ESI  $m/z$  calcd for  $\text{C}_{16}\text{H}_{20}\text{N}_2\text{NaO}_8$   $[\text{M}+\text{Na}]^+$  391.1112; found 391.1114.

**Methyl(*E*)-3-(2,4-dioxo-1-((6*aR*,8*R*,9*aS*)-2,2,4,4-tetraisopropyltetrahydro-6*H*-furo[3,2-*f*][1,3,5,2,4]trioxadisilocin-8-yl)-1,2,3,4-tetrahydropyrimidin-5-yl)acrylate (**3ga**)**

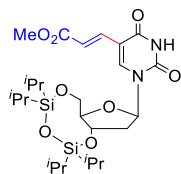

**3ga** was obtained following the general procedure **A** from **1g** on 0.1 mmol scale. After purification by PTLC (preparative TLC) using CH<sub>2</sub>Cl<sub>2</sub>/MeOH (25/1) as the eluent, **3ga** was obtained as a white solid (25.0 mg, 45%). mp 70.1–75.8 °C; [ $\alpha$ ]<sub>D</sub><sup>25</sup> -60.36 (c 0.550, MeOH); <sup>1</sup>H NMR (400 MHz, DMSO)  $\delta$  11.70 (s, 1H), 8.06 (s, 1H), 7.31 (d,  $J$  = 16.0 Hz, 1H), 6.87 (d,  $J$  = 15.6 Hz, 1H), 6.00 (dd,  $J$  = 7.8, 3.4 Hz, 1H), 4.63–4.51 (m, 1H), 4.04 (dd,  $J$  = 12.2, 5.4 Hz, 1H), 3.95 (dd,  $J$  = 12.4, 3.2 Hz, 1H), 3.79–3.72 (m, 1H), 3.67 (s, 3H), 2.58–2.52 (m, 1H), 2.38–2.29 (m, 1H), 1.11–0.94 (m, 28H). <sup>13</sup>C NMR (101 MHz, DMSO)  $\delta$  167.1, 161.7, 149.0, 144.4, 138.0, 116.5, 108.1, 84.6, 84.4, 70.1, 61.8, 51.3, 17.4, 17.2(2C), 17.1, 16.9, 16.9, 16.8, 12.7, 12.5, 12.2, 11.9. HRMS-ESI  $m/z$  calcd for C<sub>25</sub>H<sub>42</sub>N<sub>2</sub>NaO<sub>8</sub>Si<sub>2</sub> [M+Na]<sup>+</sup> 577.2372; found 577.2375.

**Methyl(*E*)-3-(1-((2*R*,3*R*,4*R*)-3-fluoro-4-hydroxy-5-(((*S*)-((*S*)-1-isopropoxy-1-oxopropan-2-yl)amino)(phenoxy)phosphoryl)oxy)methyl)-3-methyltetrahydrofuran-2-yl)-2,4-dioxo-1,2,3,4-tetrahydropyrimidin-5-yl)acrylate (**3ha**)**

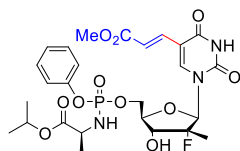

**3ha** was obtained following the general procedure **A** from **1h** on 0.1 mmol scale. After purification by PTLC (preparative TLC) using CH<sub>2</sub>Cl<sub>2</sub>/MeOH (15/1) as the eluent, **3ha** was obtained as a faint yellow solid (30.7 mg, 50%). mp 95.0–98.4 °C; [ $\alpha$ ]<sub>D</sub><sup>25</sup> +8.79 (c 0.633, MeOH); <sup>1</sup>H NMR (400 MHz, MeOD)  $\delta$  7.95 (s, 1H), 7.44–7.31 (m, 3H), 7.27 (d,  $J$  = 8.0 Hz, 2H), 7.19 (t,  $J$  = 7.0 Hz, 1H), 6.98 (d,  $J$  = 16.0 Hz, 1H), 6.17 (d,  $J$  = 11.6 Hz, 1H), 4.96–4.89 (m, 2H), 4.59–4.40 (m, 2H), 4.18–4.09 (m, 1H), 4.00–3.94 (m, 1H), 3.66 (s, 3H), 1.42–1.31 (m, 6H), 1.19 (dd,  $J$  = 6.0, 2.0 Hz, 6H). <sup>19</sup>F NMR (376 MHz, MeOD)  $\delta$  -161.9. <sup>31</sup>P NMR (162 MHz, MeOD)  $\delta$  4.0. <sup>13</sup>C NMR (101 MHz, MeOD)  $\delta$  174.4, 174.3, 169.6, 152.0, 152.0, 139.1, 130.8, 130.4, 126.3, 121.6, 121.5, 119.4, 116.2, 111.2, 102.4, 70.2, 52.0, 51.8, 25.3, 21.9, 21.9, 20.5 (d,  $J$  = 6.1 Hz), 17.0 (d,  $J$  = 25.7 Hz). HRMS-ESI  $m/z$  calcd for C<sub>26</sub>H<sub>33</sub>FN<sub>3</sub>NaO<sub>11</sub>P [M+Na]<sup>+</sup> 636.1729; found 636.1725.

**((2*R*,3*S*,4*R*,5*R*)-3,4-dihydroxy-5-(5-((*E*)-3-methoxy-3-oxoprop-1-en-1-yl)-2,4-**

**dioxo-3,4-dihydropyrimidin-1(2H)-yl)tetrahydrofuran-2-yl)methyl phosphate (3ia)**

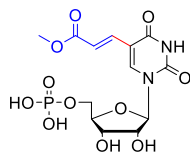

**3ia** was obtained following the general procedure **A** from **1i** on 0.2 mmol scale with mixed solvent of CH<sub>3</sub>CN/H<sub>2</sub>O (10/1, v/v). After purification by reverse-phase column chromatography (C18 Spherical silica) using MeOH/H<sub>2</sub>O as the eluent, **3ia** was obtained as a white solid (9.8 mg, 24%). mp 196.0-200.1 °C; [ $\alpha$ ]<sub>D</sub><sup>25</sup> -51.652 (c 0.575, H<sub>2</sub>O); <sup>1</sup>H NMR (400 MHz, D<sub>2</sub>O)  $\delta$  8.22 (s, 1H), 7.48 (d, *J* = 15.6 Hz, 1H), 6.91 (d, *J* = 16.0 Hz, 1H), 5.98 (d, *J* = 4.8 Hz, 1H), 4.40 (t, *J* = 4.8 Hz, 1H), 4.33 (t, *J* = 4.6 Hz, 1H), 4.28 (s, 1H), 4.20–4.04 (m, 2H), 3.78 (s, 3H). <sup>31</sup>P NMR (162 MHz, D<sub>2</sub>O)  $\delta$  0.7. <sup>13</sup>C NMR (101 MHz, D<sub>2</sub>O)  $\delta$  170.1, 163.4, 150.6, 143.6, 137.8, 117.9, 109.9, 89.1, 83.3, 74.1, 69.5, 63.9, 52.1. HRMS-ESI *m/z* calcd for C<sub>13</sub>H<sub>17</sub>N<sub>2</sub>NaO<sub>11</sub>P [M+Na]<sup>+</sup> 431.0462; found 431.0463.

**Ethyl (E)-3-(1-((2R,3R,4S,5R)-3,4-dihydroxy-5-(hydroxymethyl)tetrahydrofuran-2-yl)-2,4-dioxo-1,2,3,4-tetrahydropyrimidin-5-yl)acrylate (3ab)** <sup>[4]</sup>

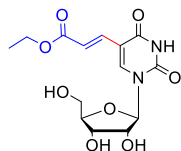

**3ab** was obtained following the general procedure **A** from **1a**. After purification by PTLC (preparative TLC) using CH<sub>2</sub>Cl<sub>2</sub>/MeOH (10/1) as the eluent, **3ab** was obtained as a white solid (24.0 mg, 70%). mp 198.2-200.0 °C; [ $\alpha$ ]<sub>D</sub><sup>25</sup> -66.53 (c 0.473, MeOH); <sup>1</sup>H NMR (400 MHz, MeOD)  $\delta$  8.57 (s, 1H), 7.39 (d, *J* = 15.6 Hz, 1H), 6.88 (d, *J* = 15.6 Hz, 1H), 5.91 (d, *J* = 2.8 Hz, 1H), 4.23–4.16 (m, 4H), 4.08–4.02 (m, 1H), 3.93 (dd, *J* = 12.4, 2.4 Hz, 1H), 3.79 (dd, *J* = 12.4, 2.4 Hz, 1H), 1.29 (t, *J* = 7.0 Hz, 3H). <sup>13</sup>C NMR (101 MHz, MeOD)  $\delta$  169.2, 163.7, 151.3, 144.7, 138.4, 119.0, 110.4, 91.2, 86.2, 76.2, 70.6, 61.6, 61.5, 14.6. HRMS-ESI *m/z* calcd for C<sub>14</sub>H<sub>18</sub>N<sub>2</sub>NaO<sub>8</sub> [M+Na]<sup>+</sup> 365.0955; found 365.0956.

**Tert-butyl(E)-3-(1-((2R,3R,4S,5R)-3,4-dihydroxy-5-(hydroxymethyl)tetrahydrofuran-2-yl)-2,4-dioxo-1,2,3,4-tetrahydropyrimidin-5-yl)acrylate (3ac)** <sup>[5]</sup>

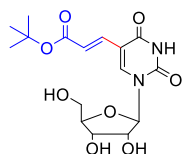

**3ac** was obtained following the general procedure **A** from **1a**. After purification by PTLC (preparative TLC) using CH<sub>2</sub>Cl<sub>2</sub>/MeOH (10/1) as the eluent, **3ac** was obtained as a white solid (27.4 mg, 74%). mp 165.3-167.3 °C; [ $\alpha$ ]<sub>D</sub><sup>25</sup> -28.39 (c 0.830, MeOH); <sup>1</sup>H NMR (400 MHz, DMSO)  $\delta$  11.65 (s, 1H), 8.46 (s, 1H), 7.21 (d,  $J$  = 15.6 Hz, 1H), 6.74 (d,  $J$  = 16.0 Hz, 1H), 5.76 (d,  $J$  = 4.4 Hz, 1H), 5.46 (d,  $J$  = 5.2 Hz, 1H), 5.31 (t,  $J$  = 5.0 Hz, 1H), 5.10 (d,  $J$  = 5.6 Hz, 1H), 4.08 (dd,  $J$  = 9.2, 4.8 Hz, 1H), 4.01 (dd,  $J$  = 10.2, 5.0 Hz, 1H), 3.89–3.84 (m, 1H), 3.76–3.69 (m, 1H), 3.63–3.55 (m, 1H), 1.44 (s, 9H). <sup>13</sup>C NMR (101 MHz, DMSO)  $\delta$  166.1, 161.7, 149.5, 143.6, 136.8, 118.6, 108.3, 88.6, 84.7, 79.6, 73.8, 69.0, 60.2, 27.9(3C). HRMS-ESI  $m/z$  calcd for C<sub>16</sub>H<sub>22</sub>N<sub>2</sub>NaO<sub>8</sub> [M+Na]<sup>+</sup> 393.1268; found 393.1270.

**Benzyl(*E*)-3-(1-((2*R*,3*R*,4*S*,5*R*)-3,4-dihydroxy-5-(hydroxymethyl)tetrahydrofuran-2-yl)-2,4-dioxo-1,2,3,4-tetrahydropyrimidin-5-yl)acrylate (**3ad**)** <sup>[5]</sup>

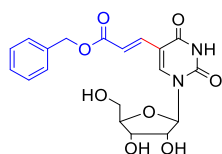

**3ad** was obtained following the general procedure **A** from **1a**. After purification by PTLC (preparative TLC) using CH<sub>2</sub>Cl<sub>2</sub>/MeOH (10/1) as the eluent, **3ad** was obtained as a white solid (27.0 mg, 67%). mp 179.6-183.7 °C; [ $\alpha$ ]<sub>D</sub><sup>25</sup> -39.29 (c 0.330, MeOH); <sup>1</sup>H NMR (400 MHz, DMSO)  $\delta$  11.69 (s, 1H), 8.51 (s, 1H), 7.42–7.30 (m, 6H), 6.89 (d,  $J$  = 16.0 Hz, 1H), 5.76 (d,  $J$  = 4.4 Hz, 1H), 5.45 (d,  $J$  = 5.2 Hz, 1H), 5.30 (t,  $J$  = 5.2 Hz, 1H), 5.18 (s, 2H), 5.07 (d,  $J$  = 5.6 Hz, 1H), 4.08 (dd,  $J$  = 9.6, 4.8 Hz, 1H), 4.01 (dd,  $J$  = 10.4, 5.2 Hz, 1H), 3.89–3.84 (m, 1H), 3.77–3.68 (m, 1H), 3.59 (ddd,  $J$  = 12.2, 4.8, 3.2 Hz, 1H). <sup>13</sup>C NMR (101 MHz, DMSO)  $\delta$  166.5, 161.7, 149.4, 144.1, 138.3, 136.3, 128.4, 128.0, 127.9, 116.2, 108.1, 88.6, 84.6, 73.8, 68.9, 65.3, 60.1. HRMS-ESI  $m/z$  calcd for C<sub>19</sub>H<sub>20</sub>N<sub>2</sub>NaO<sub>8</sub> [M+Na]<sup>+</sup> 427.1112; found 427.1118.

**Methyl(*E*)-3-(1-((2*R*,3*R*,4*S*,5*R*)-3,4-dihydroxy-5-(hydroxymethyl)tetrahydrofuran-2-yl)-2,4-dioxo-1,2,3,4-tetrahydropyrimidin-5-yl)but-2-enoate (**3ae**)**

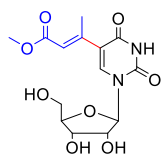

**3ae** was obtained following the general procedure **A** from **1a**. After purification by PTLC (preparative TLC) using CH<sub>2</sub>Cl<sub>2</sub>/MeOH (10/1) as the eluent, **3ae** was obtained as a white solid (18.1 mg, 53%). mp 163.9-168.6 °C; [ $\alpha$ ]<sub>D</sub><sup>25</sup> -27.14 (c 0.280, MeOH); <sup>1</sup>H NMR (400 MHz, DMSO)  $\delta$  11.54 (s, 1H), 8.33 (s, 1H), 6.77 (s, 1H), 5.80 (d,  $J$  = 4.0 Hz, 1H), 5.46 (s, 1H), 5.30 (s, 1H), 5.13 (s, 1H), 4.14–4.06 (m, 1H), 4.02 (t,  $J$  = 4.4 Hz, 1H), 3.92–3.86 (m, 1H), 3.73–3.55 (m, 5H), 2.32 (s, 3H). <sup>13</sup>C NMR (101 MHz, DMSO)  $\delta$  166.9, 161.7, 149.6, 147.6, 140.6, 116.7, 113.2, 88.7, 84.7, 74.3, 69.5, 60.1, 50.9, 16.5. HRMS-ESI  $m/z$  calcd for C<sub>14</sub>H<sub>18</sub>N<sub>2</sub>NaO<sub>8</sub> [M+Na]<sup>+</sup> 365.0955; found 365.0961.

**1-((2R,3R,4S,5R)-3,4-dihydroxy-5-(hydroxymethyl)tetrahydrofuran-2-yl)-5-(1-methyl-2,5-dioxo-2,5-dihydro-1H-pyrrol-3-yl)pyrimidine-2,4(1H,3H)-dione (3af)**<sup>[6]</sup>

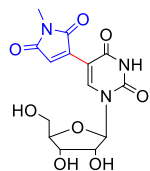

**3af** was obtained following the general procedure **A** from **1a** under O<sub>2</sub> at 90 °C. After purification by PTLC (preparative TLC) using CH<sub>2</sub>Cl<sub>2</sub>/MeOH (10/1) as the eluent, **3af** was obtained as a yellow solid (15.5 mg, 44%). mp 273.9-276.5 °C; [ $\alpha$ ]<sub>D</sub><sup>25</sup> -3.89 (c 0.300, MeOH); <sup>1</sup>H NMR (400 MHz, DMSO)  $\delta$  11.89 (s, 1H), 8.92 (s, 1H), 7.13 (s, 1H), 5.86 (d,  $J$  = 4.4 Hz, 1H), 5.50 (d,  $J$  = 5.2 Hz, 1H), 5.21 (d,  $J$  = 5.2 Hz, 1H), 4.92 (t,  $J$  = 5.2 Hz, 1H), 4.07 (dd,  $J$  = 9.4, 4.6 Hz, 1H), 3.94–3.90 (m, 1H), 3.69–3.59 (m, 2H), 2.90 (s, 3H). <sup>13</sup>C NMR (101 MHz, DMSO)  $\delta$  171.0, 170.9, 161.4, 149.2, 143.1, 135.7, 122.7, 103.6, 88.8, 85.2, 74.1, 70.3, 61.7, 23.6. HRMS-ESI  $m/z$  calcd for C<sub>14</sub>H<sub>15</sub>N<sub>3</sub>NaO<sub>8</sub> [M+Na]<sup>+</sup> 376.0751; found 376.0748.

**1-((2R,3R,4S,5R)-3,4-dihydroxy-5-(hydroxymethyl)tetrahydrofuran-2-yl)-5-((E)-styryl) pyrimidine-2,4(1H,3H)-dione (3ag)**<sup>[7]</sup>

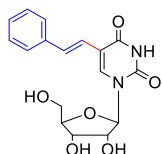

**3ag** was obtained following the general procedure **A** from **1a** under O<sub>2</sub> at 90 °C. After purification by PTLC (preparative TLC) using CH<sub>2</sub>Cl<sub>2</sub>/MeOH (10/1) as the eluent, **3ag**



was obtained as a yellow solid (20.8 mg, 60%). mp 133.7-137.9 °C;  $[\alpha]_{\text{D}}^{25}$  -50.11 (c 0.300, MeOH);  $^1\text{H}$  NMR (400 MHz, DMSO)  $\delta$  11.51 (s, 1H), 8.32 (s, 1H), 7.46 (d,  $J$  = 7.6 Hz, 2H), 7.40–7.328 (m, 3H), 7.23 (t,  $J$  = 7.4 Hz, 1H), 6.88 (d,  $J$  = 16.4 Hz, 1H), 5.81 (d,  $J$  = 4.4 Hz, 1H), 5.46 (d,  $J$  = 4.4 Hz, 1H), 5.34 (t,  $J$  = 4.4 Hz, 1H), 5.12 (d,  $J$  = 4.0 Hz, 1H), 4.14–4.07 (m, 1H), 4.07–4.01 (m, 1H), 3.91–3.87 (m, 1H), 3.78–3.73 (m, 1H), 3.65–3.60 (m, 1H).  $^{13}\text{C}$  NMR (101 MHz, DMSO)  $\delta$  162.3, 149.8, 138.1, 137.5, 128.8(2C), 127.8, 127.5, 126.1(2C), 120.9, 110.8, 88.4, 84.7, 74.0, 69.5, 60.5. HRMS-ESI  $m/z$  calcd for  $\text{C}_{17}\text{H}_{18}\text{N}_2\text{NaO}_6$   $[\text{M}+\text{Na}]^+$  369.1057; found 369.1061.

**1-((2*R*,3*R*,4*S*,5*R*)-3,4-dihydroxy-5-(hydroxymethyl)tetrahydrofuran-2-yl)-5-((*E*)-4-(trifluoromethyl)styryl) pyrimidine-2,4(1*H*,3*H*)-dione (3ah)**<sup>18</sup>

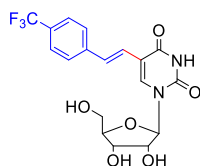

**3ah** was obtained following the general procedure **A** from **1a** under  $\text{O}_2$  at 90 °C. After purification by PTLC (preparative TLC) using  $\text{CH}_2\text{Cl}_2/\text{MeOH}$  (10/1) as the eluent, **3ah** was obtained as a beige solid (12.4 mg, 30%). mp 202.5-207.3 °C;  $[\alpha]_{\text{D}}^{25}$  -52.27 (c 0.383, MeOH);  $^1\text{H}$  NMR (400 MHz, DMSO)  $\delta$  11.59 (s, 1H), 8.40 (s, 1H), 7.74–7.64 (m, 4H), 7.47 (d,  $J$  = 16.4 Hz, 1H), 7.04 (d,  $J$  = 16.4 Hz, 1H), 5.81 (d,  $J$  = 4.4 Hz, 1H), 5.48 (d,  $J$  = 5.2 Hz, 1H), 5.36 (t,  $J$  = 4.6 Hz, 1H), 5.12 (d,  $J$  = 5.2 Hz, 1H), 4.14–4.01 (m, 2H), 3.91–3.88 (m, 1H), 3.80–3.72 (m, 1H), 3.67–3.58 (m, 1H).  $^{19}\text{F}$  NMR (376 MHz, DMSO)  $\delta$  -60.8.  $^{13}\text{C}$  NMR (101 MHz, DMSO)  $\delta$  162.1, 149.7, 141.6, 139.3, 127.4, 127.0, 126.5, 125.8, 125.6 (q,  $J_{\text{C-F}}$  = 3.8 Hz), 124.4 (m,  $J_{\text{C-F}}$  = 270.0 Hz), 124.1, 110.2, 88.4, 84.6, 73.9, 69.3, 60.3. HRMS-ESI  $m/z$  calcd for  $\text{C}_{18}\text{H}_{17}\text{F}_3\text{N}_2\text{NaO}_6$   $[\text{M}+\text{Na}]^+$  437.0931; found 437.0934.

**1-((2*R*,3*R*,4*S*,5*R*)-3,4-dihydroxy-5-(hydroxymethyl)tetrahydrofuran-2-yl)-5-((*E*)-2-(phenylsulfonyl)vinyl)pyrimidine-2,4(1*H*,3*H*)-dione (3ai)**

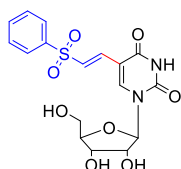

**3ai** was obtained following the general procedure **A** from **1a**. After purification by PTLC (preparative TLC) using  $\text{CH}_2\text{Cl}_2/\text{MeOH}$  (10/1) as the eluent, **3ai** was obtained as a white solid (20.5 mg, 50%). mp 234.0-235.8 °C;  $[\alpha]_{\text{D}}^{25}$  -52.19 (c 0.350, MeOH);  $^1\text{H}$

NMR (400 MHz, MeOD)  $\delta$  8.64 (s, 1H), 7.89 (d,  $J = 7.2$  Hz, 2H), 7.67 (t,  $J = 7.4$  Hz, 1H), 7.63-7.56 (m, 2H), 7.52 (d,  $J = 15.2$  Hz, 1H), 7.35 (d,  $J = 14.8$  Hz, 1H), 5.89 (d,  $J = 2.8$  Hz, 1H), 4.22-4.17 (m, 1H), 4.07-4.02 (m, 1H), 3.95 (dd,  $J = 12.4, 2.4$  Hz, 1H), 3.80 (dd,  $J = 12.4, 2.4$  Hz, 1H).  $^{13}\text{C}$  NMR (126 MHz, DMSO)  $\delta$  161.7, 149.7, 145.9, 141.0, 135.9, 133.5, 129.7, 127.0, 125.5, 106.5, 88.8, 84.6, 73.8, 68.8, 60.1. HRMS-ESI  $m/z$  calcd for  $\text{C}_{17}\text{H}_{18}\text{N}_2\text{NaO}_8\text{S}$   $[\text{M}+\text{Na}]^+$  433.0676; found 433.0682.

**(E)-2-(1-((2R,3R,4S,5R)-3,4-dihydroxy-5-(hydroxymethyl)tetrahydrofuran-2-yl)-2,4-dioxo-1,2,3,4-tetrahydropyrimidin-5-yl)ethene-1-sulfonyl fluoride (3aj)**

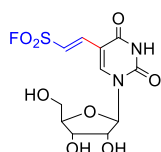

**3aj** was obtained following the general procedure **A** from **1a**. After purification by PTLC (preparative TLC) using  $\text{CH}_2\text{Cl}_2/\text{MeOH}$  (10/1) as the eluent, **3aj** was obtained as a yellow solid (9.2 mg, 26%). mp 162.5-166.3  $^\circ\text{C}$ ;  $[\alpha]_{\text{D}}^{25}$  -17.81 (c 0.640, MeOH);  $^1\text{H}$  NMR (400 MHz, MeOD)  $\delta$  8.76 (s, 1H), 7.61 (dd,  $J = 15.0, 2.2$  Hz, 1H), 7.51 (d,  $J = 14.8$  Hz, 1H), 5.88 (d,  $J = 2.4$  Hz, 1H), 4.22-4.17 (m, 2H), 4.07-4.03 (m, 1H), 3.95 (dd,  $J = 12.4, 2.4$  Hz, 1H), 3.79 (dd,  $J = 12.4, 2.4$  Hz, 1H).  $^{19}\text{F}$  NMR (377 MHz, MeOD)  $\delta$  60.4 (s).  $^{13}\text{C}$  NMR (101 MHz, MeOD)  $\delta$  163.1, 150.9, 148.9, 143.3, 117.8 (d,  $J = 27.4$  Hz), 107.7, 91.6, 86.1, 76.3, 70.2, 61.3. HRMS-ESI  $m/z$  calcd for  $\text{C}_{11}\text{H}_{13}\text{FN}_2\text{NaO}_8\text{S}$   $[\text{M}+\text{Na}]^+$  375.0269; found 375.0265.

**Ethyl (E)-3-(1-((2R,4S,5R)-4-hydroxy-5-(hydroxymethyl)tetrahydrofuran-2-yl)-2,4-dioxo-1,2,3,4-tetrahydropyrimidin-5-yl)acrylate (3bb)** <sup>[9]</sup>

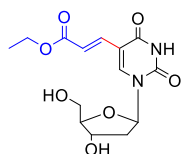

**3bb** was obtained following the general procedure **A** from **1b**. After purification by PTLC (preparative TLC) using  $\text{CH}_2\text{Cl}_2/\text{MeOH}$  (12/1) as the eluent, **3bb** was obtained as a white solid (23.4 mg, 72%). mp 167.5-169.4  $^\circ\text{C}$ ;  $[\alpha]_{\text{D}}^{25}$  +1.00 (c 0.400, MeOH);  $^1\text{H}$  NMR (400 MHz, DMSO)  $\delta$  11.65 (s, 1H), 8.41 (s, 1H), 7.35 (d,  $J = 16.0$  Hz, 1H), 6.84 (d,  $J = 16.0$  Hz, 1H), 6.13 (t,  $J = 6.4$  Hz, 1H), 5.27 (d,  $J = 4.4$  Hz, 1H), 5.18 (t,  $J = 5.2$  Hz, 1H), 4.29-4.22 (m, 1H), 4.14 (q,  $J = 7.1$  Hz, 2H), 3.79 (dd,  $J = 6.8, 3.6$  Hz, 1H), 3.69-3.53 (m, 2H), 2.24-2.11 (m, 2H), 1.22 (t,  $J = 7.0$  Hz, 3H).  $^{13}\text{C}$  NMR (101 MHz, MeOD)  $\delta$  169.3, 163.7, 151.1, 144.7, 138.6, 118.9, 110.4, 89.2, 87.1, 71.7, 62.4, 61.5,

41.9, 14.6. HRMS-ESI  $m/z$  calcd for  $C_{14}H_{18}N_2NaO_7$   $[M+Na]^+$  349.1006; found 349.1004.

**Tert-butyl(*E*)-3-(1-((2*R*,4*S*,5*R*)-4-hydroxy-5-(hydroxymethyl)tetrahydrofuran-2-yl)-2,4-dioxo-1,2,3,4-tetrahydropyrimidin-5-yl)acrylate (**3bc**)<sup>[10]</sup>**

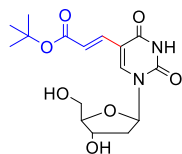

**3bc** was obtained following the general procedure **A** from **1b**. After purification by PTLC (preparative TLC) using  $CH_2Cl_2/MeOH$  (12/1) as the eluent, **3bc** was obtained as a white solid (24.2 mg, 68%). mp 105.8-107.4 °C;  $[\alpha]_D^{25} +0.40$  (c 0.420, MeOH);  $^1H$  NMR (400 MHz, MeOD)  $\delta$  8.44 (s, 1H), 7.28 (d,  $J = 16.0$  Hz, 1H), 6.78 (d,  $J = 16.0$  Hz, 1H), 6.26 (t,  $J = 6.4$  Hz, 1H), 4.45–4.40 (m, 1H), 3.95 (dd,  $J = 6.4, 3.2$  Hz, 1H), 3.86 (dd,  $J = 12.0, 2.4$  Hz, 1H), 3.76 (dd,  $J = 12.4, 3.2$  Hz, 1H), 2.38–2.23 (m, 2H), 1.49 (s, 9H).  $^{13}C$  NMR (101 MHz, MeOD)  $\delta$  168.7, 163.7, 151.1, 144.4, 137.5, 120.8, 110.5, 89.2, 87.0, 81.5, 71.7, 62.4, 41.9, 28.4. HRMS-ESI  $m/z$  calcd for  $C_{16}H_{22}N_2NaO_7$   $[M+Na]^+$  377.1319; found 377.1322.

**Benzyl(*E*)-3-(1-((2*R*,4*S*,5*R*)-4-hydroxy-5-(hydroxymethyl)tetrahydrofuran-2-yl)-2,4-dioxo-1,2,3,4-tetrahydropyrimidin-5-yl)acrylate (**3bd**)**

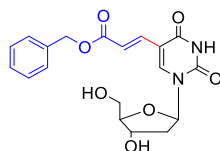

**3bd** was obtained following the general procedure **A** from **1b**. After purification by PTLC (preparative TLC) using  $CH_2Cl_2/MeOH$  (12/1) as the eluent, **3bd** was obtained as a white solid (23.7 mg, 61%). mp 89.6-90.3 °C;  $[\alpha]_D^{25} +1.11$  (c 0.330, MeOH);  $^1H$  NMR (400 MHz, MeOD)  $\delta$  8.49 (s, 1H), 7.44 (d,  $J = 15.6$  Hz, 1H), 7.40–7.29 (m, 4H), 6.94 (d,  $J = 16.0$  Hz, 1H), 6.25 (t,  $J = 6.4$  Hz, 1H), 5.20 (s, 2H), 4.42 (dt,  $J = 6.1, 4.0$  Hz, 1H), 3.95 (q,  $J = 3.3$  Hz, 1H), 3.85 (dd,  $J = 12.2, 3.0$  Hz, 1H), 3.75 (dd,  $J = 12.2, 3.4$  Hz, 1H), 2.38–2.22 (m, 2H).  $^{13}C$  NMR (101 MHz, MeOD)  $\delta$  169.0, 163.7, 151.1, 144.9, 139.0, 137.7, 129.5(2C), 129.2(2C), 118.5, 110.4, 89.2, 87.1, 71.7, 67.2, 62.4, 41.9. HRMS-ESI  $m/z$  calcd for  $C_{19}H_{20}N_2NaO_7$   $[M+Na]^+$  411.1163; found 411.1171.

**Methyl (*E*)-3-(1-((2*R*,4*S*,5*R*)-4-hydroxy-5-(hydroxymethyl)tetrahydrofuran-2-yl)-2,4-dioxo-1,2,3,4-tetrahydropyrimidin-5-yl)but-2-enoate (**3be**)**

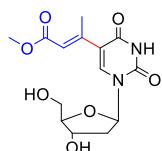

**3be** was obtained following the general procedure **A** from **1b**. After purification by PTLC (preparative TLC) using CH<sub>2</sub>Cl<sub>2</sub>/MeOH (12/1) as the eluent, **3be** was obtained as a white solid (13.4 mg, 41%). mp 175.4-176.7 °C; [ $\alpha$ ]<sub>D</sub><sup>25</sup> +6.67 (c 0.270, MeOH); <sup>1</sup>H NMR (400 MHz, MeOD)  $\delta$  8.35 (s, 1H), 6.66 (s, 1H), 6.31 (t, *J* = 6.6 Hz, 1H), 4.46–4.40 (m, 1H), 3.96 (q, *J* = 2.9 Hz, 1H), 3.83 (dd, *J* = 12.0, 2.8 Hz, 1H), 3.75 (dd, *J* = 12.0, 2.8 Hz, 1H), 3.69 (s, 3H), 2.40 (s, 3H), 2.34–2.25 (m, 2H). <sup>13</sup>C NMR (126 MHz, MeOD)  $\delta$  169.1, 163.7, 151.4, 149.3, 141.4, 118.9, 116.1, 89.2, 87.0, 72.1, 62.5, 51.5, 41.9, 17.4. HRMS-ESI *m/z* calcd for C<sub>14</sub>H<sub>18</sub>N<sub>2</sub>NaO<sub>7</sub> [M+Na]<sup>+</sup> 349.1006; found 349.1009.

**1-((2R,4S,5R)-4-hydroxy-5-(hydroxymethyl)tetrahydrofuran-2-yl)-5-(1-methyl-2,5-dioxo-2,5-dihydro-1H-pyrrol-3-yl)pyrimidine-2,4(1H,3H)-dione (3bf)<sup>[6]</sup>**

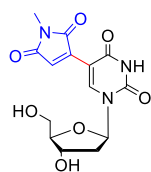

**3bf** was obtained following the general procedure **A** from **1b** under O<sub>2</sub> at 90 °C. After purification by PTLC (preparative TLC) using CH<sub>2</sub>Cl<sub>2</sub>/MeOH (12/1) as the eluent, **3bf** was obtained as a yellow solid (12.5 mg, 37%). mp >300 °C; [ $\alpha$ ]<sub>D</sub><sup>25</sup> -20.42 (c 0.360, DMSO); <sup>1</sup>H NMR (400 MHz, DMSO)  $\delta$  11.84 (s, 1H), 8.99 (s, 1H), 7.12 (s, 1H), 6.15 (t, *J* = 6.4 Hz, 1H), 5.37 (d, *J* = 4.0 Hz, 1H), 4.92 (t, *J* = 5.2 Hz, 1H), 4.27-4.21 (m, 1H), 3.91-3.85 (m, 1H), 3.65–3.51 (m, 2H), 2.89 (s, 3H), 2.24-2.21 (m, 1H), 2.17–2.07 (m, 1H). <sup>13</sup>C NMR (101 MHz, DMSO)  $\delta$  171.1, 171.0, 161.6, 149.0, 143.1, 135.9, 122.2, 103.2, 88.1, 85.7, 70.7, 61.7, 23.6. HRMS-ESI *m/z* calcd for C<sub>14</sub>H<sub>15</sub>N<sub>3</sub>NaO<sub>7</sub> [M+Na]<sup>+</sup> 360.0802; found 360.0804.

**1-((2R,4S,5R)-4-hydroxy-5-(hydroxymethyl)tetrahydrofuran-2-yl)-5-((E)-styryl)pyrimidine-2,4(1H,3H)-dione (3bg)<sup>[11]</sup>**

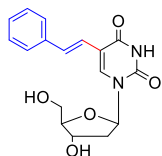

**3bg** was obtained following the general procedure **A** from **1b** under O<sub>2</sub> at 90 °C. After

purification by PTLC (preparative TLC) using CH<sub>2</sub>Cl<sub>2</sub>/MeOH (12/1) as the eluent, **3bg** was obtained as a faint yellow solid (17.2 mg, 52%). mp 99.8–101.4 °C; [ $\alpha$ ]<sub>D</sub><sup>25</sup> -3.49 (c 0.430, MeOH); <sup>1</sup>H NMR (400 MHz, MeOD)  $\delta$  8.32 (s, 1H), 7.45 (d, *J* = 8.0 Hz, 2H), 7.41 (d, *J* = 16.4 Hz, 1H), 7.30 (t, *J* = 7.4 Hz, 2H), 7.20 (t, *J* = 7.2 Hz, 1H), 6.89 (d, *J* = 16.4 Hz, 1H), 6.32 (t, *J* = 6.6 Hz, 1H), 4.46 (dd, *J* = 9.2, 4.0 Hz, 1H), 3.96 (dd, *J* = 6.2, 3.0 Hz, 1H), 3.88 (dd, *J* = 12.2, 2.6 Hz, 1H), 3.79 (dd, *J* = 12.0, 3.2 Hz, 1H), 2.38–2.25 (m, 2H). <sup>13</sup>C NMR (101 MHz, MeOD)  $\delta$  164.5, 151.4, 139.1, 138.8, 130.3, 129.6(2C), 128.5, 127.3(2C), 121.0, 113.3, 89.0, 86.7, 71.9, 62.6, 41.7. HRMS-ESI *m/z* calcd for C<sub>17</sub>H<sub>18</sub>N<sub>2</sub>NaO<sub>5</sub> [M+Na]<sup>+</sup> 353.1108; found 353.1112.

**1-((2*R*,4*S*,5*R*)-4-hydroxy-5-(hydroxymethyl)tetrahydrofuran-2-yl)-5-((*E*)-2-(phenylsulfonyl)vinyl)pyrimidine-2,4(1*H*,3*H*)-dione (3bi)**

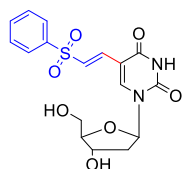

**3bi** was obtained following the general procedure **A** from **1b**. After purification by PTLC (preparative TLC) using CH<sub>2</sub>Cl<sub>2</sub>/MeOH (12/1) as the eluent, **3bi** was obtained as a yellow solid (15.4 mg, 39%). mp >300 °C; [ $\alpha$ ]<sub>D</sub><sup>25</sup> +0.71 (c 0.380, MeOH); <sup>1</sup>H NMR (400 MHz, DMSO)  $\delta$  11.73 (s, 1H), 8.48 (s, 1H), 7.91–7.82 (m, 2H), 7.75–7.68 (m, 1H), 7.68–7.61 (m, 2H), 7.46 (d, *J* = 15.2 Hz, 1H), 7.39 (d, *J* = 14.8 Hz, 1H), 6.10 (t, *J* = 6.4 Hz, 1H), 5.29 (d, *J* = 4.4 Hz, 1H), 5.19 (t, *J* = 5.2 Hz, 1H), 4.29–4.21 (m, 1H), 3.80 (q, *J* = 3.7 Hz, 1H), 3.71–3.52 (m, 2H), 2.21–2.13 (m, 2H). <sup>13</sup>C NMR (101 MHz, MeOD)  $\delta$  163.4, 150.9, 146.9, 142.6, 136.9, 134.5, 130.5(2C), 128.4(2C), 127.8, 108.6, 89.2, 87.2, 71.5, 62.3, 41.9. HRMS-ESI *m/z* calcd for C<sub>17</sub>H<sub>18</sub>N<sub>2</sub>NaO<sub>7</sub>S [M+Na]<sup>+</sup> 417.0727; found 417.0727.

**(*E*)-2-(1-((2*R*,4*S*,5*R*)-4-hydroxy-5-(hydroxymethyl)tetrahydrofuran-2-yl)-2,4-dioxo-1,2,3,4-tetrahydropyrimidin-5-yl)ethene-1-sulfonyl fluoride (3bj)**

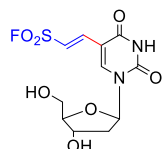

**3bj** was obtained following the general procedure **A** from **1b**. After purification by PTLC (preparative TLC) using CH<sub>2</sub>Cl<sub>2</sub>/MeOH (12/1) as the eluent, **3bj** was obtained as a white solid (8.1 mg, 24%). mp 193.3–194.2 °C; [ $\alpha$ ]<sub>D</sub><sup>25</sup> +5.68 (c 0.370, MeOH); <sup>1</sup>H

NMR (400 MHz, MeOD)  $\delta$  8.66 (s, 1H), 7.62 (dd,  $J = 14.8, 2.4$  Hz, 1H), 7.55 (dd,  $J = 15.2, 0.8$  Hz, 1H), 6.22 (t,  $J = 6.2$  Hz, 1H), 4.41 (dt,  $J = 6.4, 4.0$  Hz, 1H), 3.96 (dd,  $J = 6.8, 3.2$  Hz, 1H), 3.87 (dd,  $J = 12.0, 2.8$  Hz, 1H), 3.76 (dd,  $J = 12.2, 3.4$  Hz, 1H), 2.42–2.34 (m, 1H), 2.30–2.20 (m, 1H).  $^{19}\text{F}$  NMR (377 MHz, MeOD)  $\delta$  60.4 (s).  $^{13}\text{C}$  NMR (101 MHz, MeOD)  $\delta$  163.1, 150.7, 149.0, 143.4, 117.7 (d,  $J = 27.6$  Hz), 107.6, 89.3, 87.6, 71.4, 62.2, 42.1. HRMS-ESI  $m/z$  calcd for  $\text{C}_{11}\text{H}_{13}\text{FN}_2\text{NaO}_7\text{S}$   $[\text{M}+\text{Na}]^+$  359.0320; found 359.0315.

### 3.1 Applications of the methodology

#### a) Gram scale preparation of 3aa

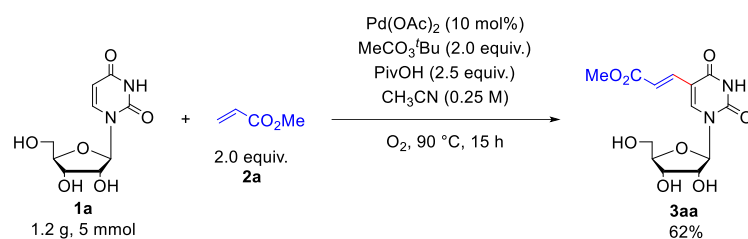

**General procedure B (gram scale):** A 250 mL reaction tube was charged with substrate **1a** (1.2 g, 5 mmol, 1.0 equiv.),  $\text{Pd}(\text{OAc})_2$  (0.5 mmol, 10 mol%),  $\text{CH}_3\text{CO}_3^t\text{Bu}$  (10 mmol, 2.0 equiv.) (50% solution in aromatic free mineral spirit),  $\text{PivOH}$  (12.5 mmol, 2.5 equiv.) and **2a** (10 mmol, 2.0 equiv.), then 20 mL  $\text{CH}_3\text{CN}$  were added to dissolved the mixture. The reaction solution was bubbled with  $\text{O}_2$  for 30 min. The tube was sealed with a Teflon-lined cap and the reaction mixture was then placed to a pre-heated oil bath to stir at 90 °C for 15 h (*Caution: The tube was carefully capped and covered with safety shield.*). The reaction mixture was then cooled to room temperature. It was filtered through a pad of celite, and then washed with methanol. The filtrate was concentrated under reduced pressure and the residue was purified by column chromatography on silica gel using  $\text{CH}_2\text{Cl}_2/\text{MeOH}$  (50/1 to 25/1) as the eluent to give the pure product **3aa**.

#### b) On-water reaction <sup>a</sup>

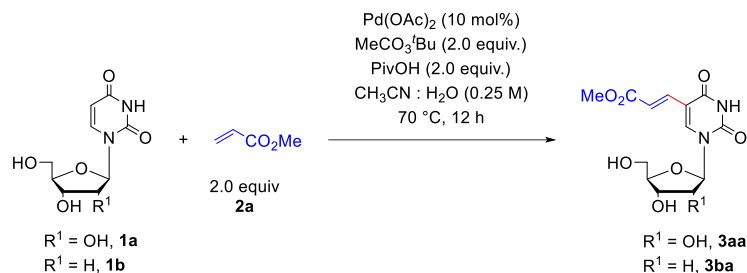

| Entry | CH <sub>3</sub> CN:H <sub>2</sub> O | Yield <sup>b</sup> of 3 |     | Recovery <sup>b</sup> of 1 |     |
|-------|-------------------------------------|-------------------------|-----|----------------------------|-----|
|       |                                     | 3aa                     | 3ba | 1a                         | 1b  |
| 1     | 10:1                                | 61%                     | 61% | 32%                        | 23% |
| 2     | 7:1                                 | 48% <sup>c</sup>        | 52% | 48%                        | 35% |
| 3     | 5:1                                 | 39%                     | 38% | 60%                        | 55% |
| 4     | 3:1                                 | 23%                     | 26% | 58%                        | 65% |
| 5     | 1:1                                 | 5%                      | 9%  | 95%                        | 90% |
| 6     | 1:3                                 | 2%                      | 2%  | 98%                        | 98% |
| 7     | H <sub>2</sub> O                    | 2%                      | 2%  | 98%                        | 94% |
| 8     | CH <sub>3</sub> CN                  | 79%                     | 73% | 13%                        | 8%  |

<sup>a</sup> Conditions: uridine **1a** or **1b** (0.1 mmol), methyl acrylate **2a** (0.2 mmol), Pd(OAc)<sub>2</sub> (0.01 mmol), MeCO<sub>3</sub><sup>t</sup>Bu (0.2 mmol), PivOH (0.2 mmol), CH<sub>3</sub>CN : H<sub>2</sub>O (v/v, 0.4 mL) under air at 70 °C for 12 hours. <sup>b</sup> Yields and recovery were determined by LC-MS. <sup>c</sup> Isolated yield.

**General procedure C (0.1 mmol scale):** A 10 mL reaction tube was charged with substrate **1a** (0.1 mmol, 1.0 equiv.), Pd(OAc)<sub>2</sub> (2.2 mg, 0.01 mmol, 10 mol%), CH<sub>3</sub>CO<sub>3</sub><sup>t</sup>Bu (64 μL, 0.2 mmol, 2.0 equiv.) (50% solution in aromatic free mineral spirit), PivOH (20.4 mg, 0.2 mmol, 2.0 equiv.) and **2a** (18 μL, 0.2 mmol, 2.0 equiv.), then 0.35 mL CH<sub>3</sub>CN and 0.05 mL H<sub>2</sub>O were added to dissolve the above mixture. The tube was sealed and the reaction mixture was then placed to a pre-heated oil bath to stir at 70 °C for 12 h. The reaction mixture was then cooled to room temperature. It was filtered through a pad of celite and washed with methanol. The filtrate was concentrated under reduced pressure and the residue was purified by PTLC (preparative TLC) (CH<sub>2</sub>Cl<sub>2</sub>:MeOH = 10:1) to give the pure product **3aa**.

### c) Derivative of 3aj [12, 13]

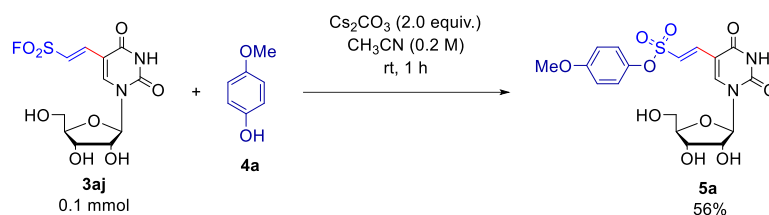

A 10 mL sample vial was charged with **3aj** (35 mg, 0.10 mmol, 1.0 equiv.), *p*-methoxyphenol (13.6 mg, 0.11 mmol, 1.1 equiv.) and  $\text{Cs}_2\text{CO}_3$  (65.2 mg, 0.20 mmol, 2.0 equiv.), and then  $\text{CH}_3\text{CN}$  (0.5 mL) was added to dissolve the above mixture. The reaction was stirred at ambient temperature for 1 h. Then it was filtered through a pad of celite and washed with methanol. The filtrate was concentrated under reduced pressure and the residue was purified by PTLC (preparative TLC) ( $\text{CH}_2\text{Cl}_2$ :MeOH = 10:1) to give the pure product **5a** as a white solid (26.8 mg, 56% yield).

**4-methoxyphenyl** (*E*)-2-(1-((2*R*,3*R*,4*S*,5*R*)-3,4-dihydroxy-5-(hydroxymethyl) tetrahydrofuran-2-yl)-2,4-dioxo-1,2,3,4-tetrahydropyrimidin-5-yl) ethene-1-sulfonate (**5a**)

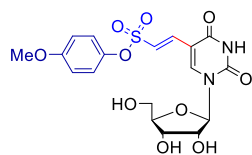

After purification by PTLC (preparative TLC) using  $\text{CH}_2\text{Cl}_2$ /MeOH (10/1) as the eluent, **5a** was obtained as a white solid (26.8 mg, 56%). mp 180.5-184.6 °C;  $[\alpha]_{\text{D}}^{25}$  -17.36 (c 0.457, MeOH);  $^1\text{H}$  NMR (400 MHz, DMSO)  $\delta$  11.84 (s, 1H), 8.54 (s, 1H), 7.46 (d,  $J$  = 15.2 Hz, 1H), 7.26 – 7.12 (m, 3H), 6.97 (d,  $J$  = 8.8 Hz, 2H), 5.73 (d,  $J$  = 4.0 Hz, 1H), 5.49 (d,  $J$  = 5.2 Hz, 1H), 5.27 (t,  $J$  = 5.2 Hz, 1H), 5.11 (d,  $J$  = 5.6 Hz, 1H), 4.06 (dd,  $J$  = 9.2, 4.4 Hz, 1H), 3.98 (dd,  $J$  = 10.4, 5.2 Hz, 1H), 3.89–3.82 (m, 1H), 3.75 (s, 3H), 3.72–3.65 (m, 1H), 3.61–3.53 (m, 1H).  $^{13}\text{C}$  NMR (101 MHz, DMSO)  $\delta$  161.6, 157.9, 149.3, 146.6, 142.5, 139.5, 123.5, 118.4, 114.9, 106.1, 88.9, 84.6, 73.8, 68.8, 60.1, 55.5. HRMS-ESI  $m/z$  calcd for  $\text{C}_{18}\text{H}_{20}\text{N}_2\text{NaO}_{10}\text{S}$   $[\text{M}+\text{Na}]^+$  479.0731; found 479.0740.



---

## 4. References

- [1] D. Y. Piao, A. Basavapathruni, P. Iyidogan, G. X. Dai, W. Hinz, A. S. Ray, E. Murakami, J. Y. Feng, F. You, G. E. Dutschman, D. J. Austin, K. A. Parker and K. S. Anderson, *Bioorg. Med. Chem. Lett.*, 2013, **23**, 1511-1518.
- [2] S. Bhilare, V. Gayakhe, A. V. Ardhapure, Y. S. Sanghvi, C. Schulzke, Y. Borozdina and A. R. Kapdi, *RSC Adv.*, 2016, **6**, 83820-83830.
- [3] Y. L. Ding, J. L. Girardet, Z. Hong, S. Z. Shaw and N. H. Yao, *Heterocycle.*, 2006, **68**, 521-530.
- [4] R. Kumar, L. H. Xu, E. E. Knaus, L. I. Wiebe, D. R. Tovell, D. L. Tyrrell and T. M. Allen, *J. Med. Chem.*, 1990, **33**, 717-723.
- [5] R. F. Whale, P. L. Coe and R. T. Walker, *Nucleosides & Nucleotides.*, 1991, **10**, 1615-1624.
- [6] T. Itahara, *Chem. Lett.*, 1986, **15**, 239-242.
- [7] S. Izuta and M. Saneyoshi, *Chem. Pharm. Bull.*, 1987, **12**, 4829-4838.
- [8] M. Segal and B. Fischer, *Org. Biomol. Chem.*, 2012, **10**, 1571-1580.
- [9] W. E. Herve and C. Len, *RSC Adv.*, 2014, **4**, 46926-49929.
- [10] V. Aucagne, S. B. Raboin, P. Guenot and L. A. Agrofoglio, *J. Comb. Chem.*, 2004, **6**, 717-723.
- [11] V. Gayakhe, A. Ardhapure, A. R. Kapdi, Y. S. Sanghvi, J. L. Serrano, L. García, J. Pérez, J. García, G. Sánchez, C. Fischer and C. Schulzke, *J. Org. Chem.*, 2016, **81**, 2713-2729.
- [12] T. S. B. Lou, S. W. Bagley and M. C. Willis, *Angew. Chem. Int. Ed.*, 2019, **58**, 18859-18863.
- [13] X. Y. Chen, Y. C. Wu, J. Zhou, P. Wang and J. Q. Yu, *Org. Lett.*, 2019, **21**, 1426-1429.

## 5. NMR Spectra

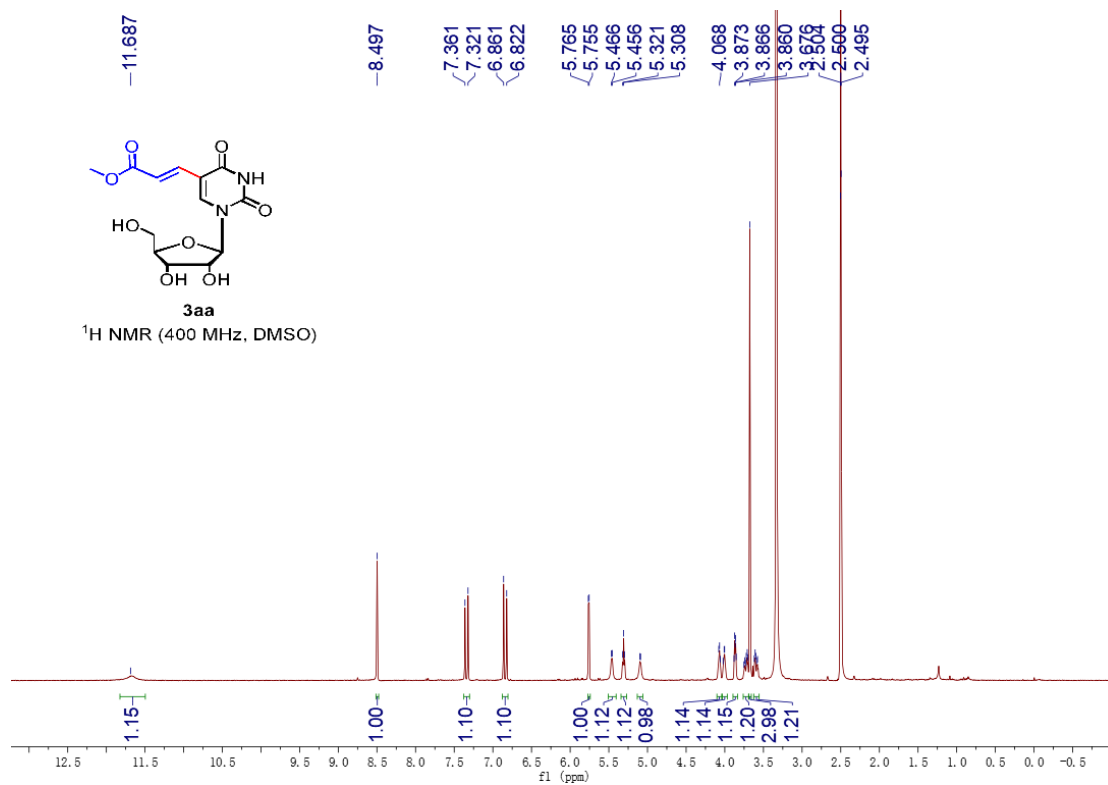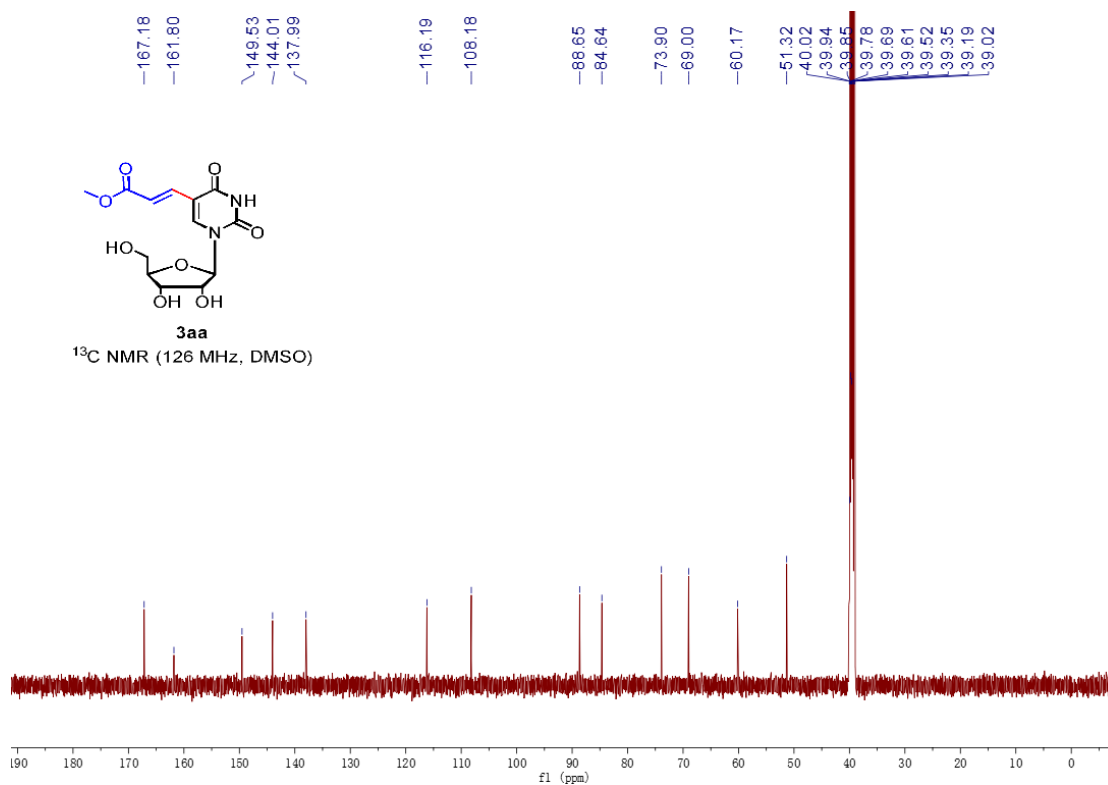

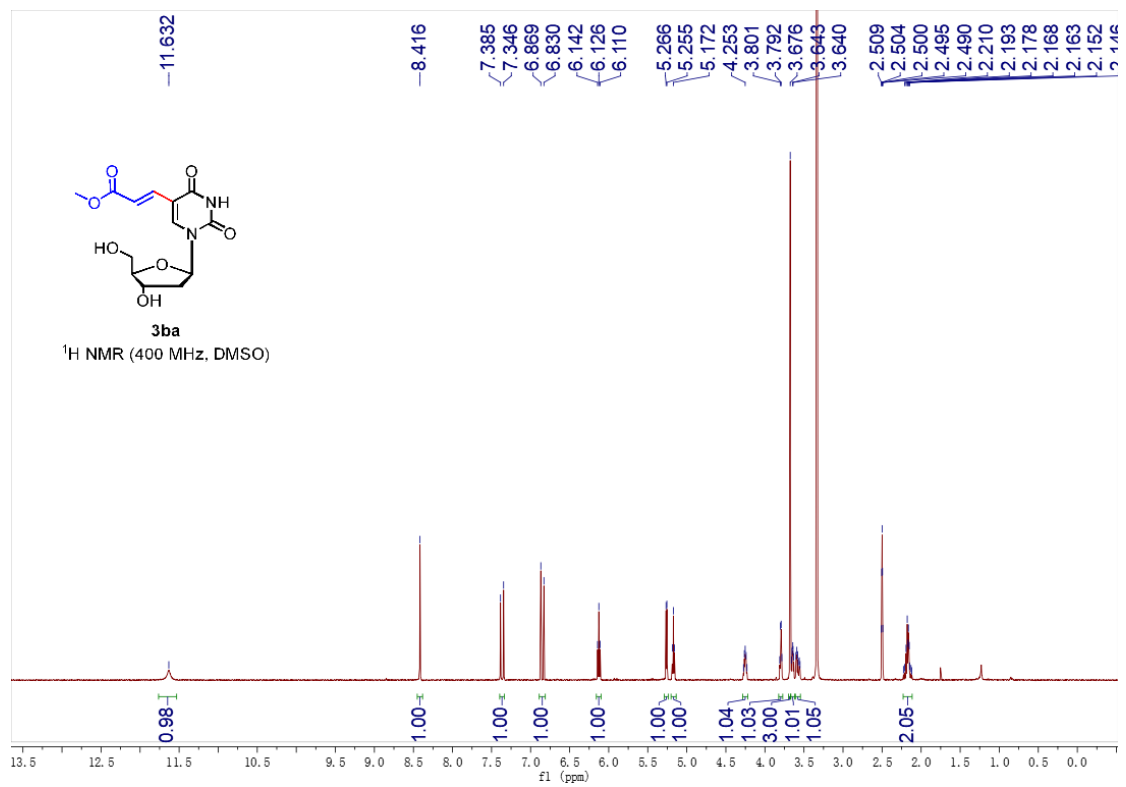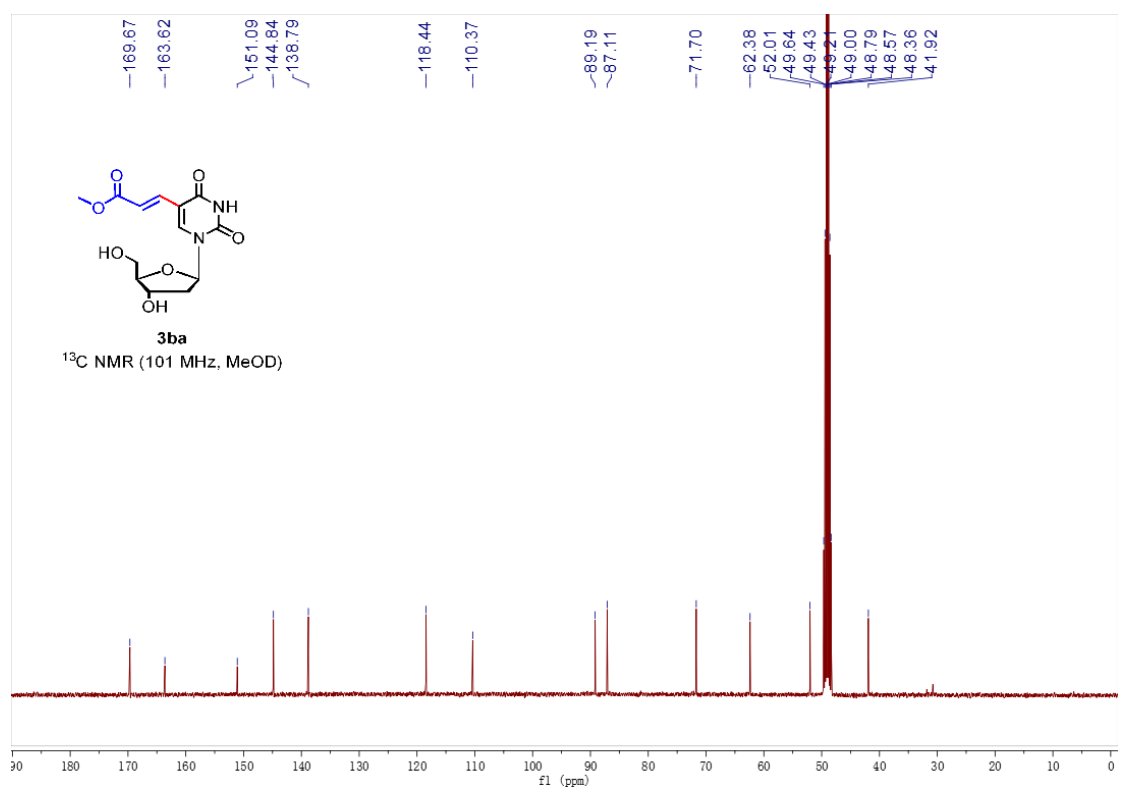

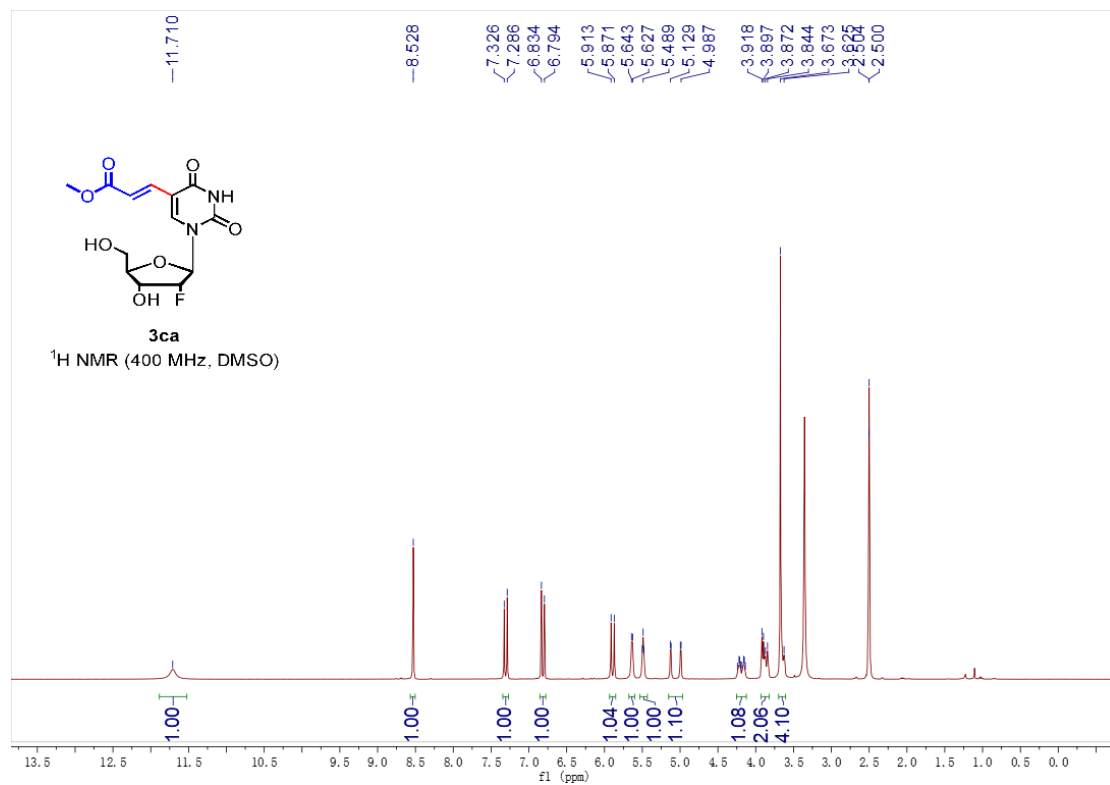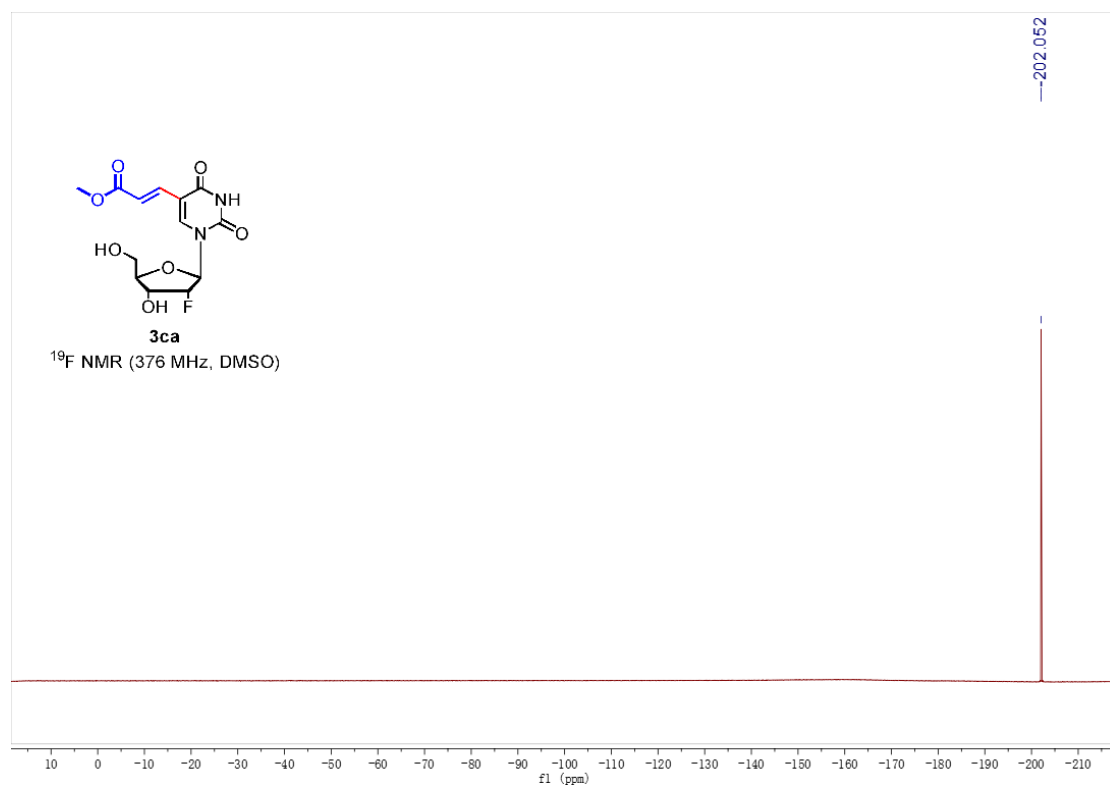

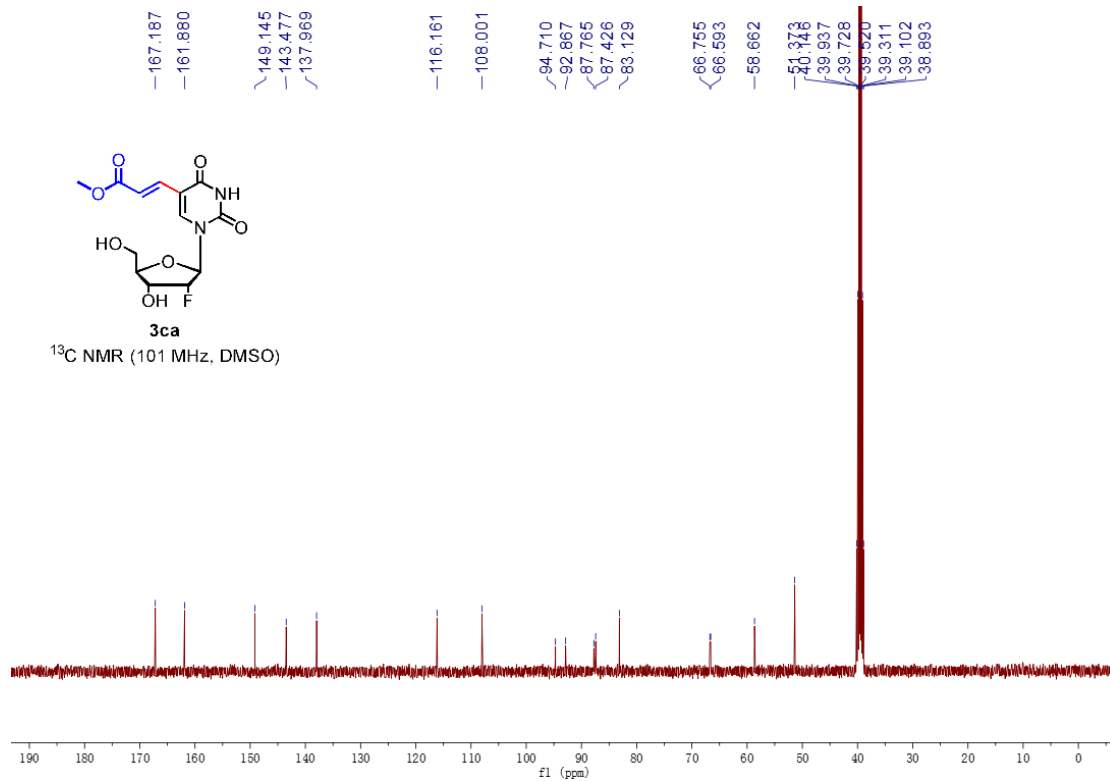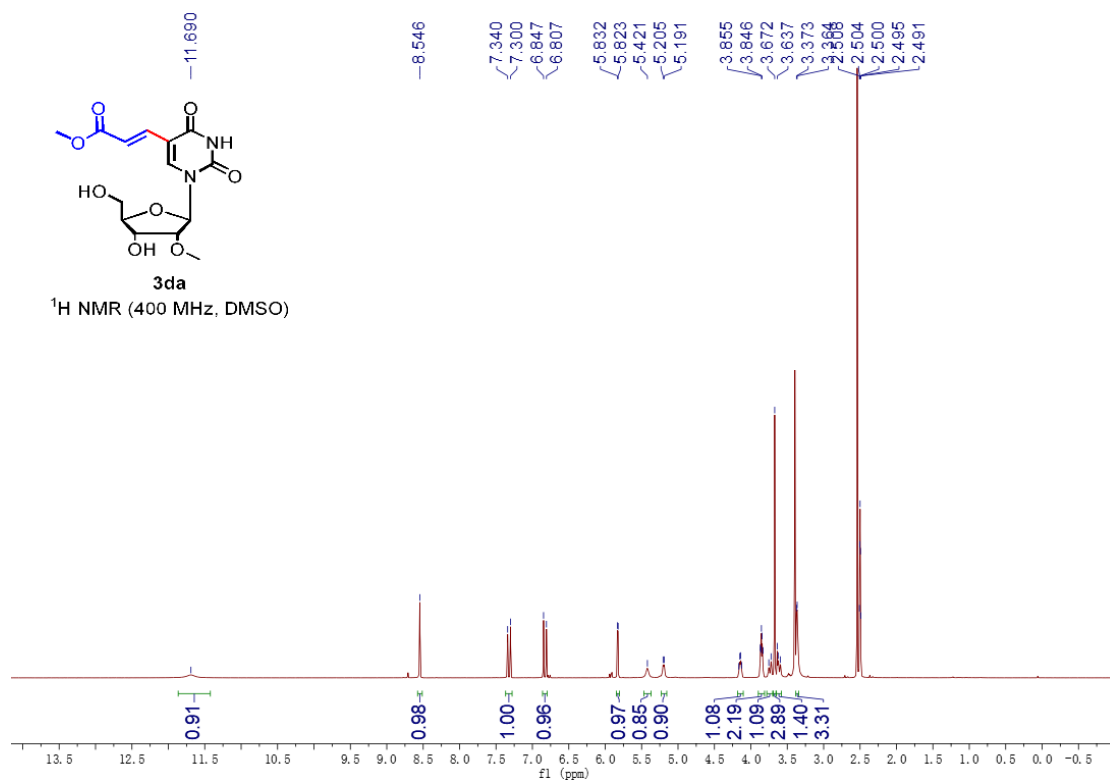

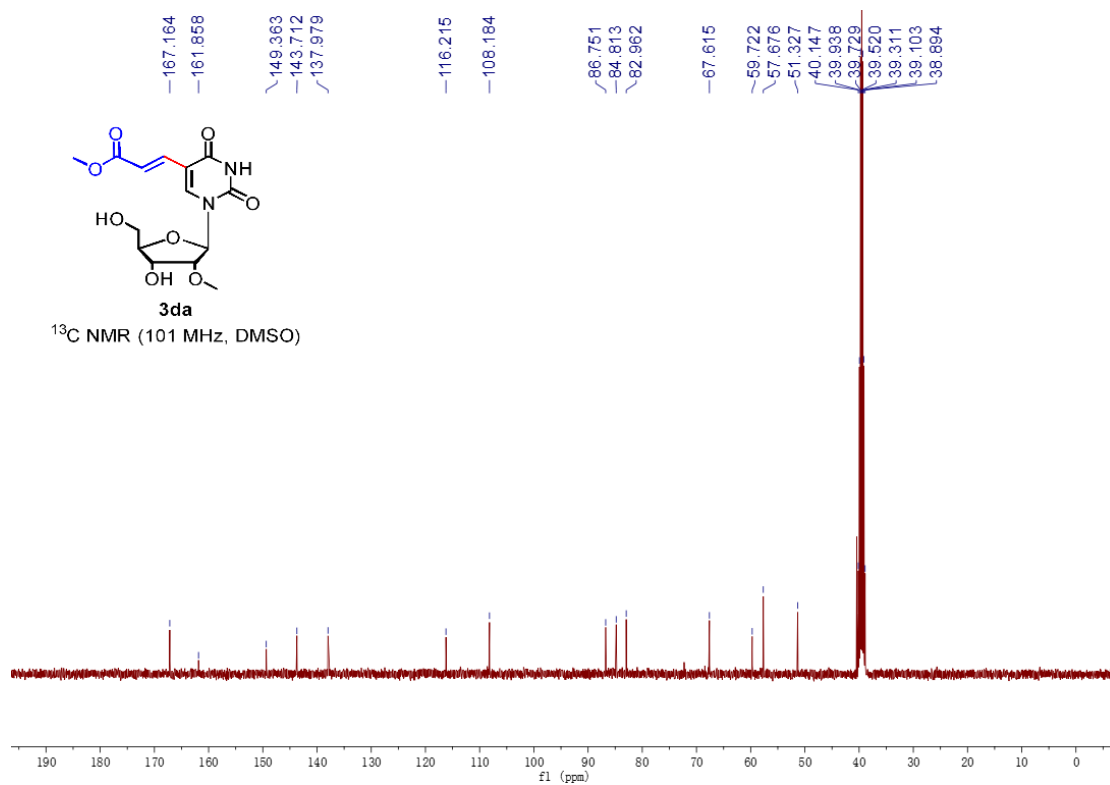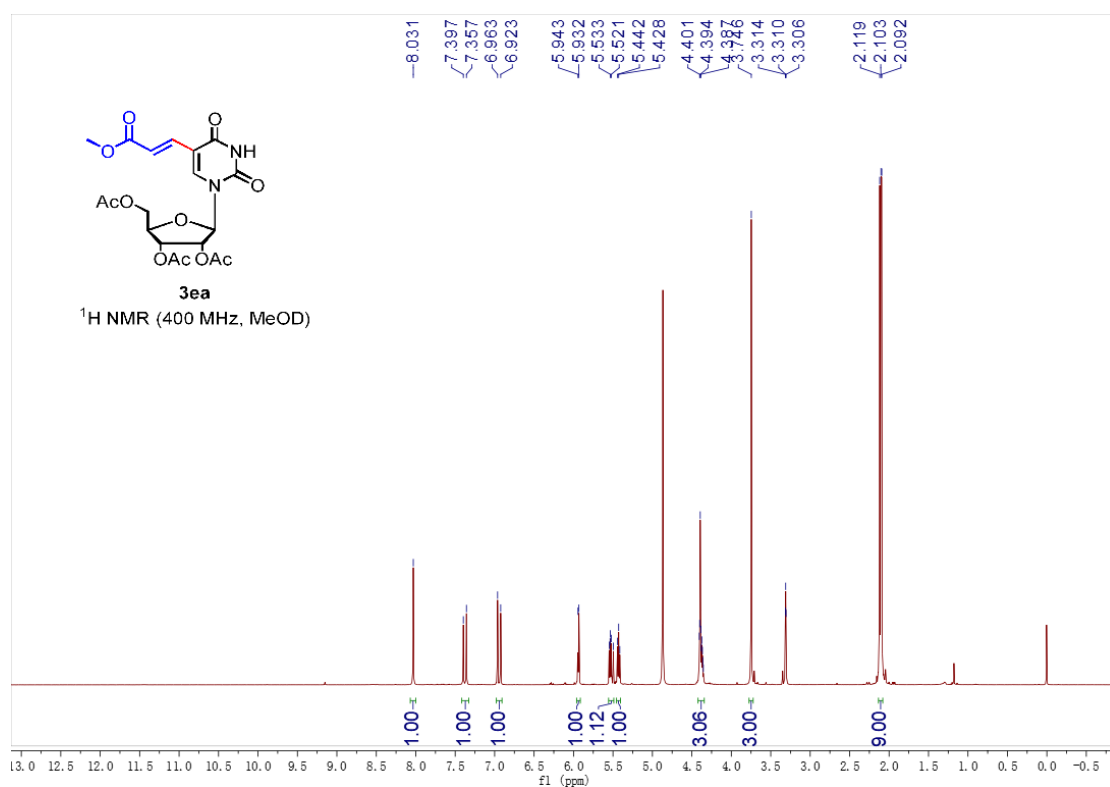

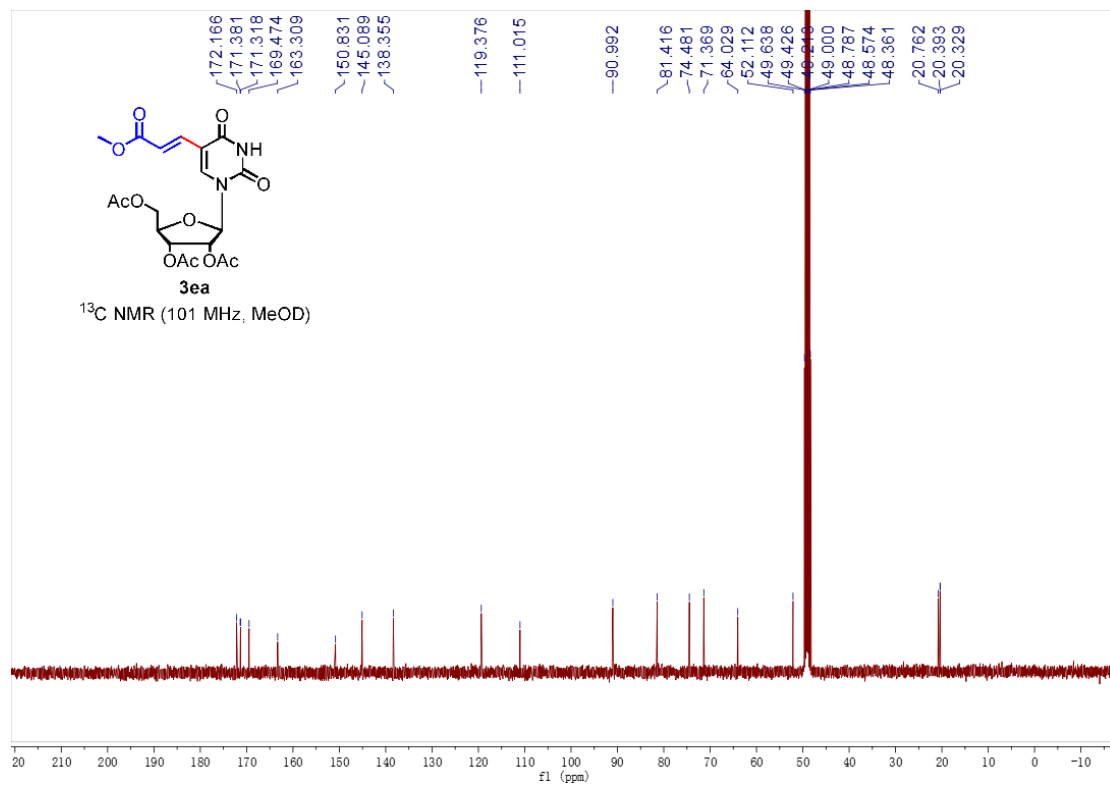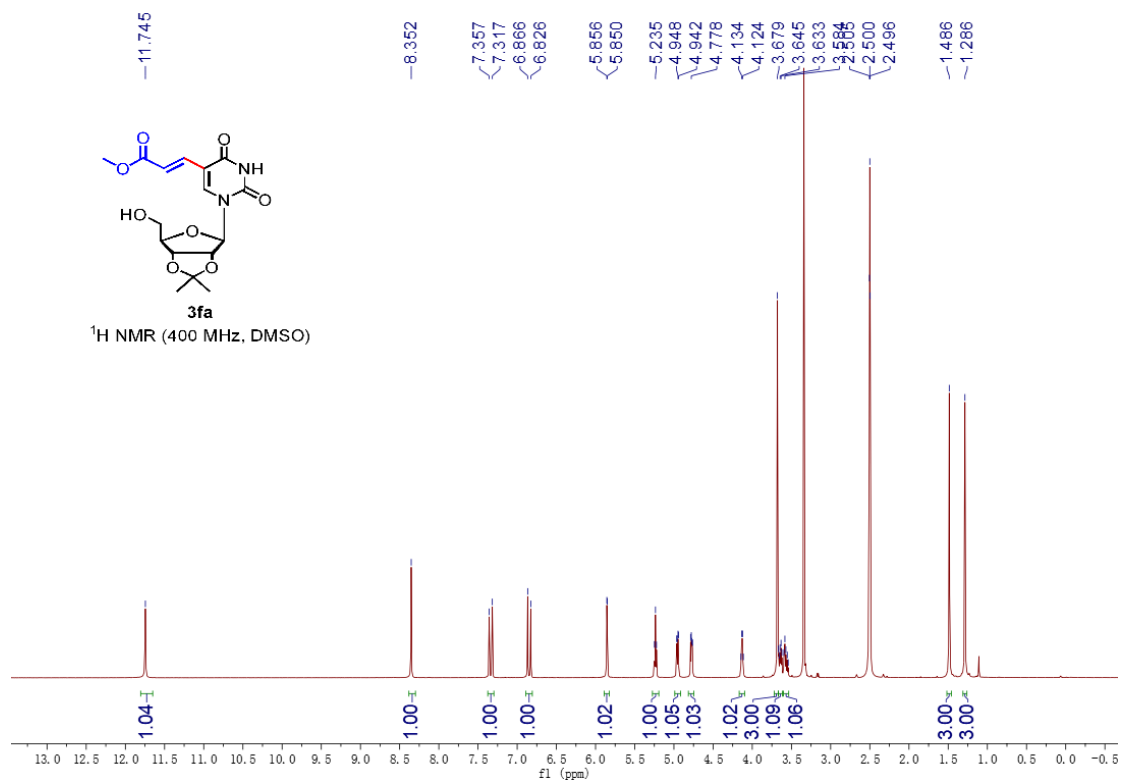

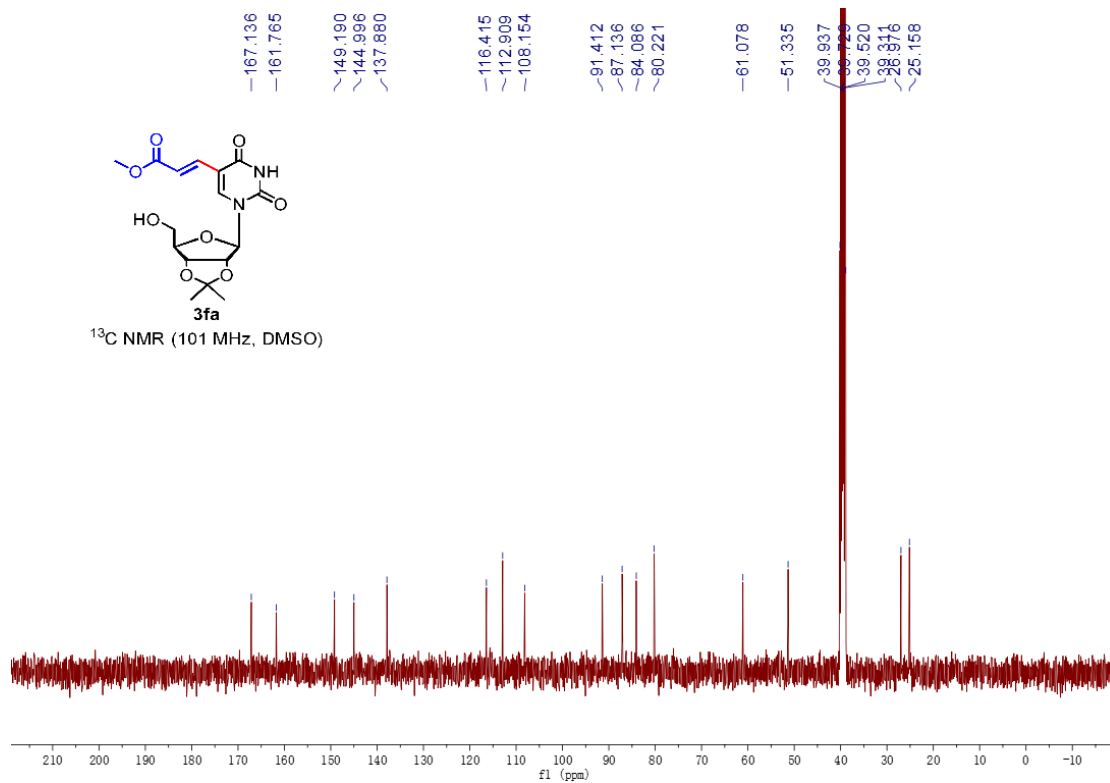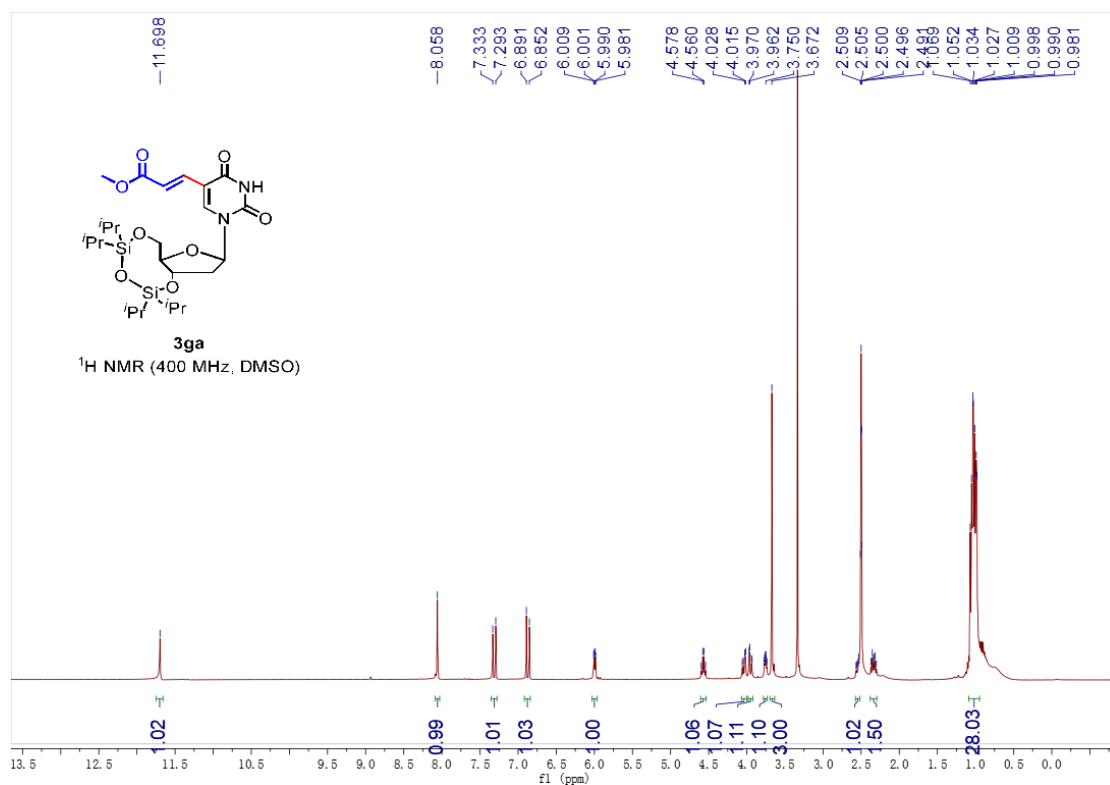



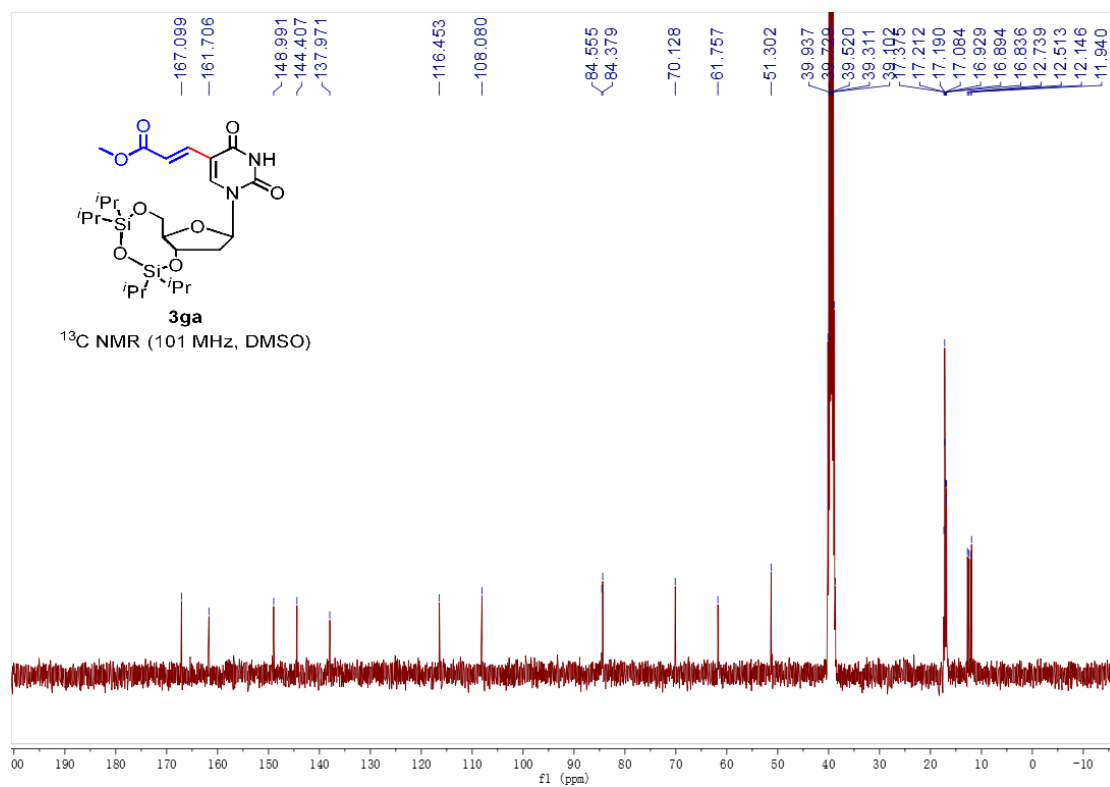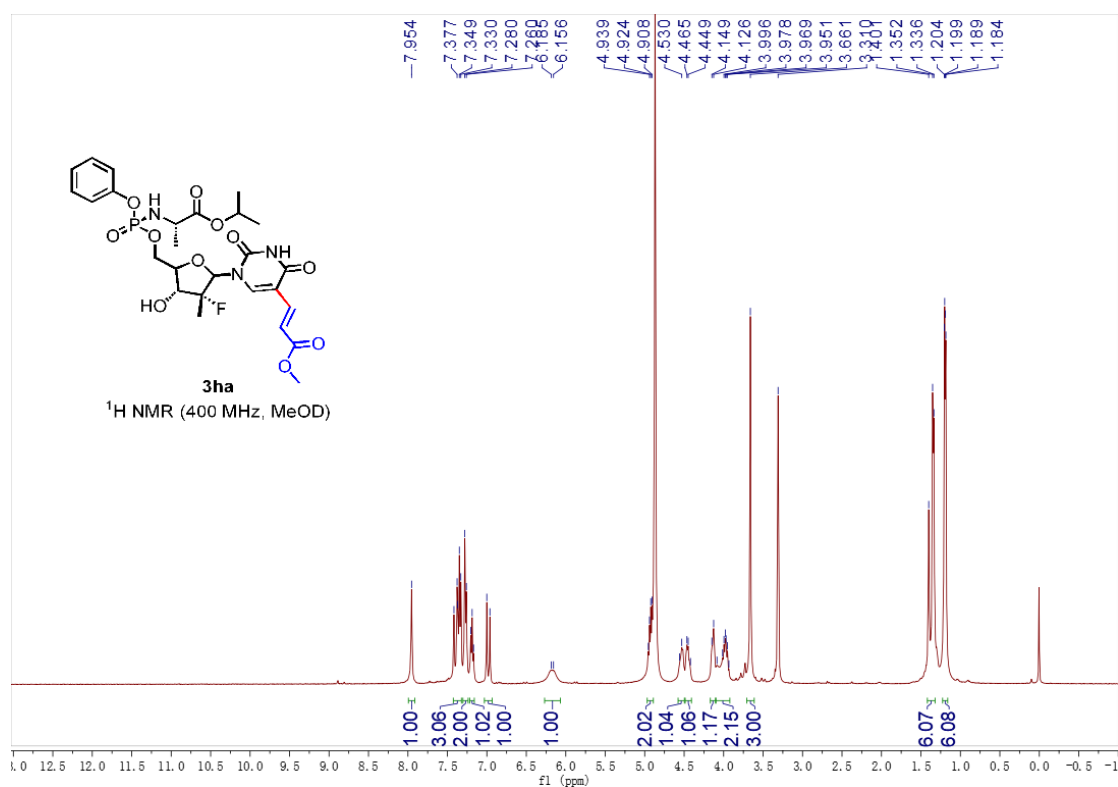

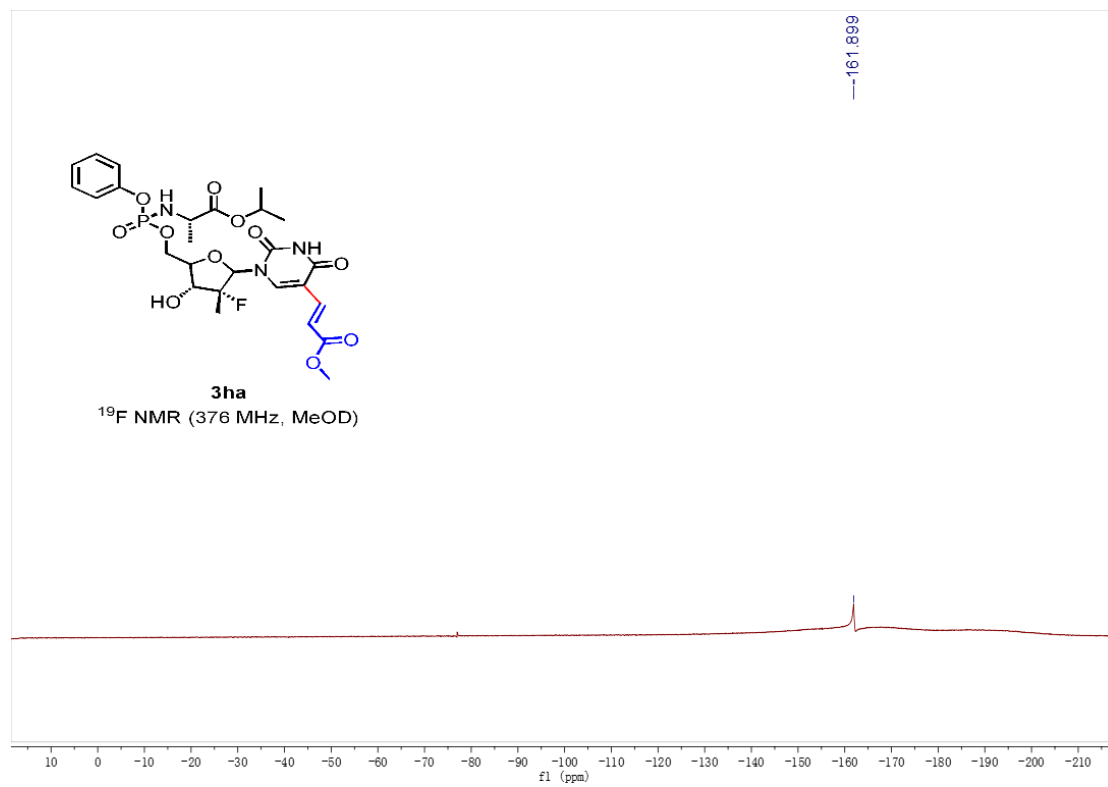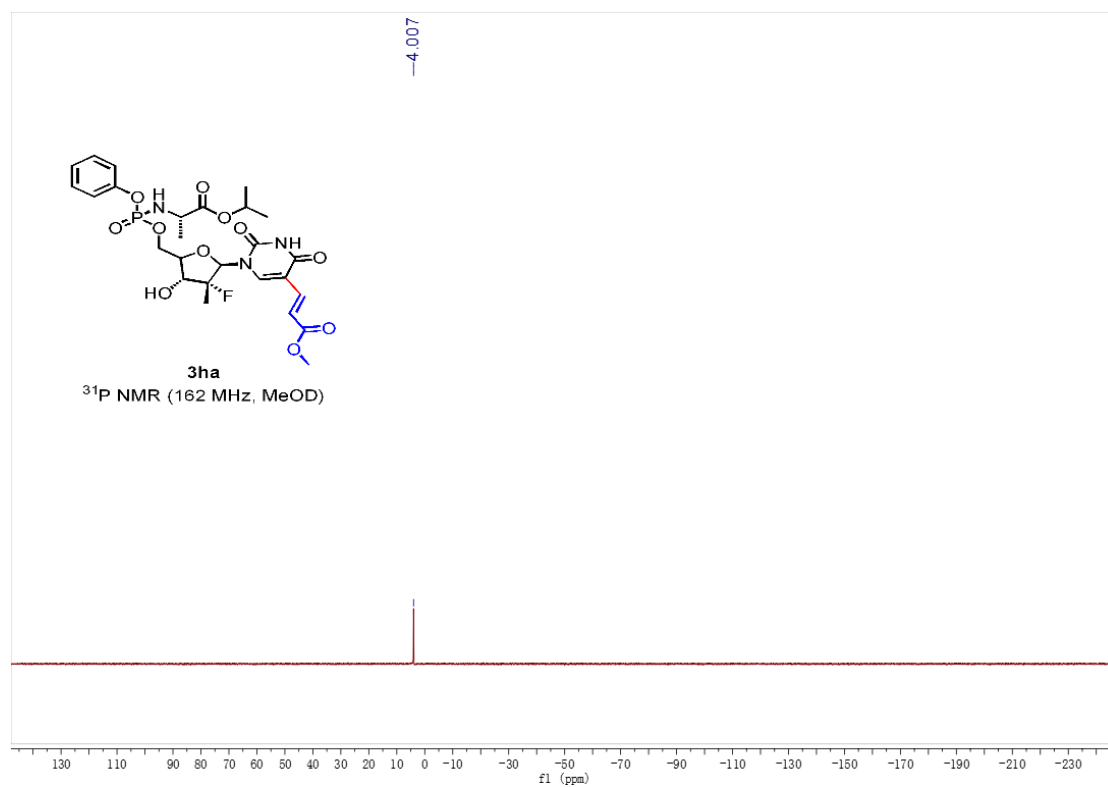

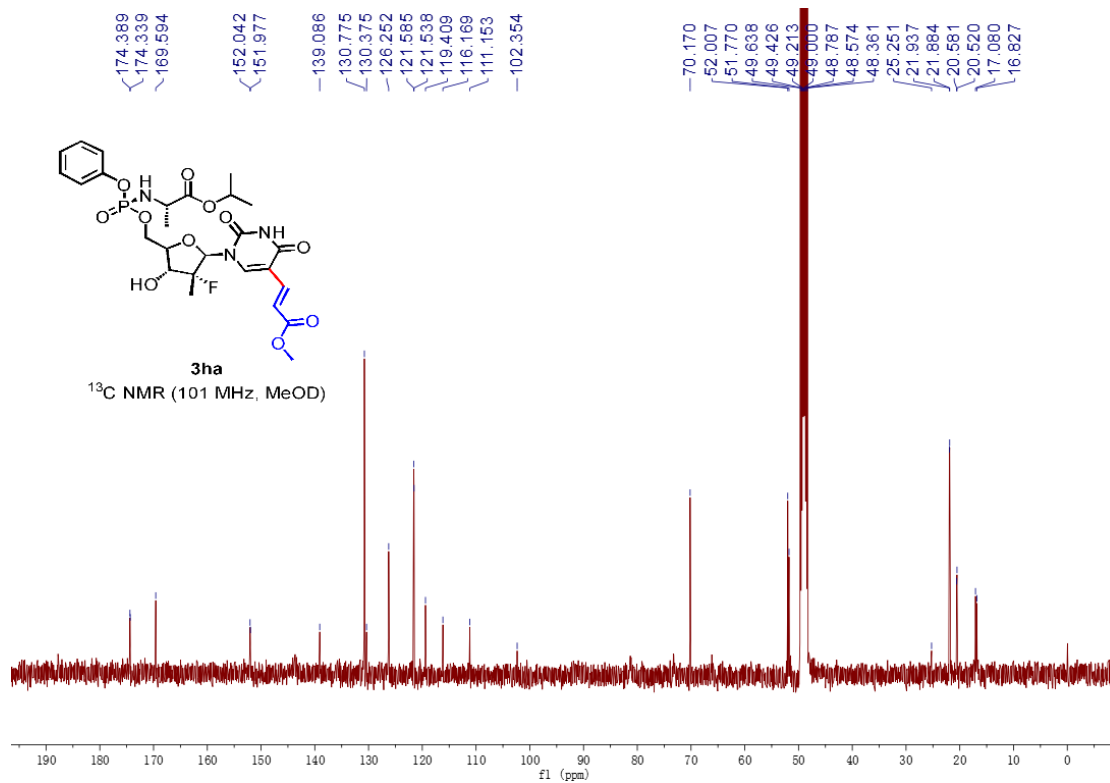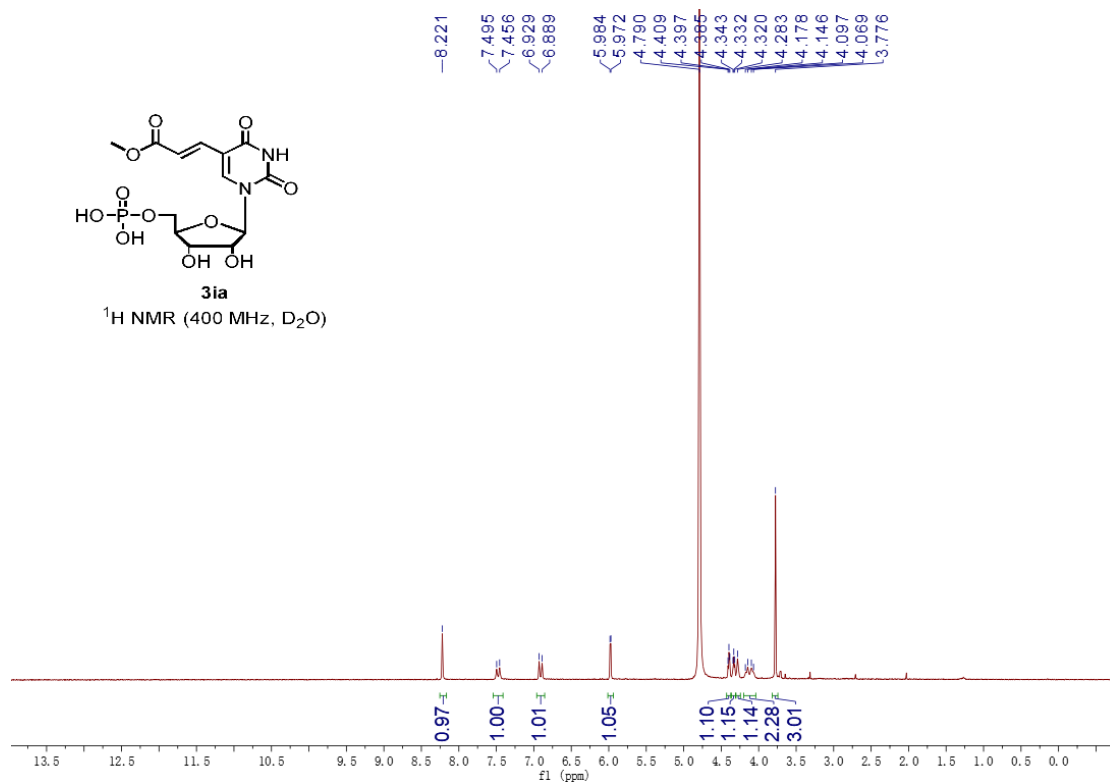

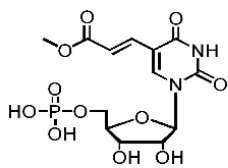

**3ia**

$^{31}\text{P}$  NMR (162 MHz,  $\text{D}_2\text{O}$ )

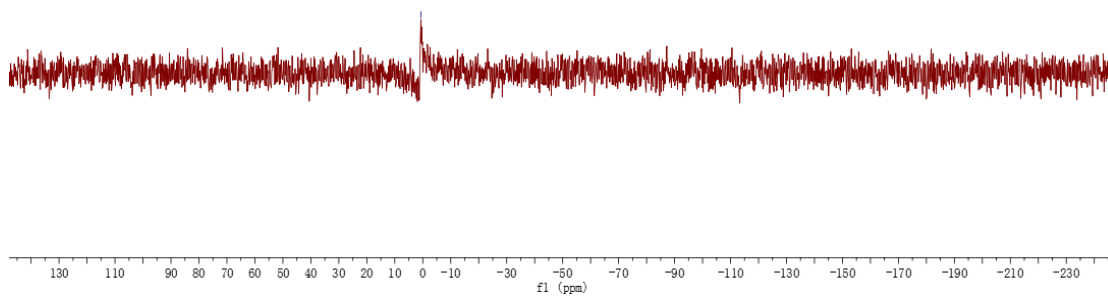

-170.074  
-163.413  
-150.546  
-143.604  
-137.837  
-117.882  
-109.899  
-89.053  
-83.297  
-74.086  
-69.459  
-63.906  
-52.129

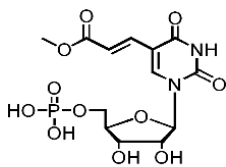

**3ia**

$^{13}\text{C}$  NMR (101 MHz,  $\text{D}_2\text{O}$ )

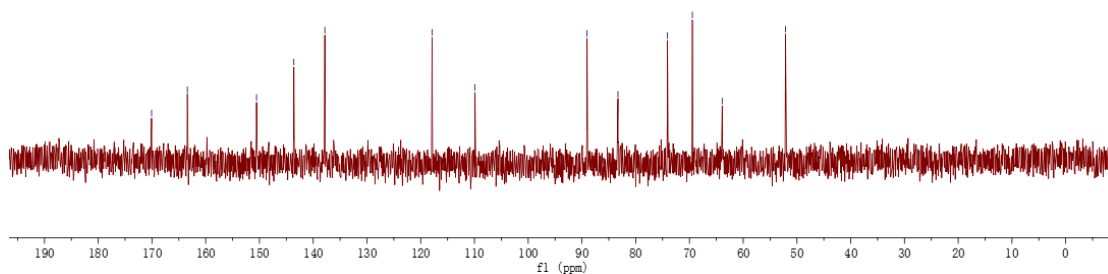

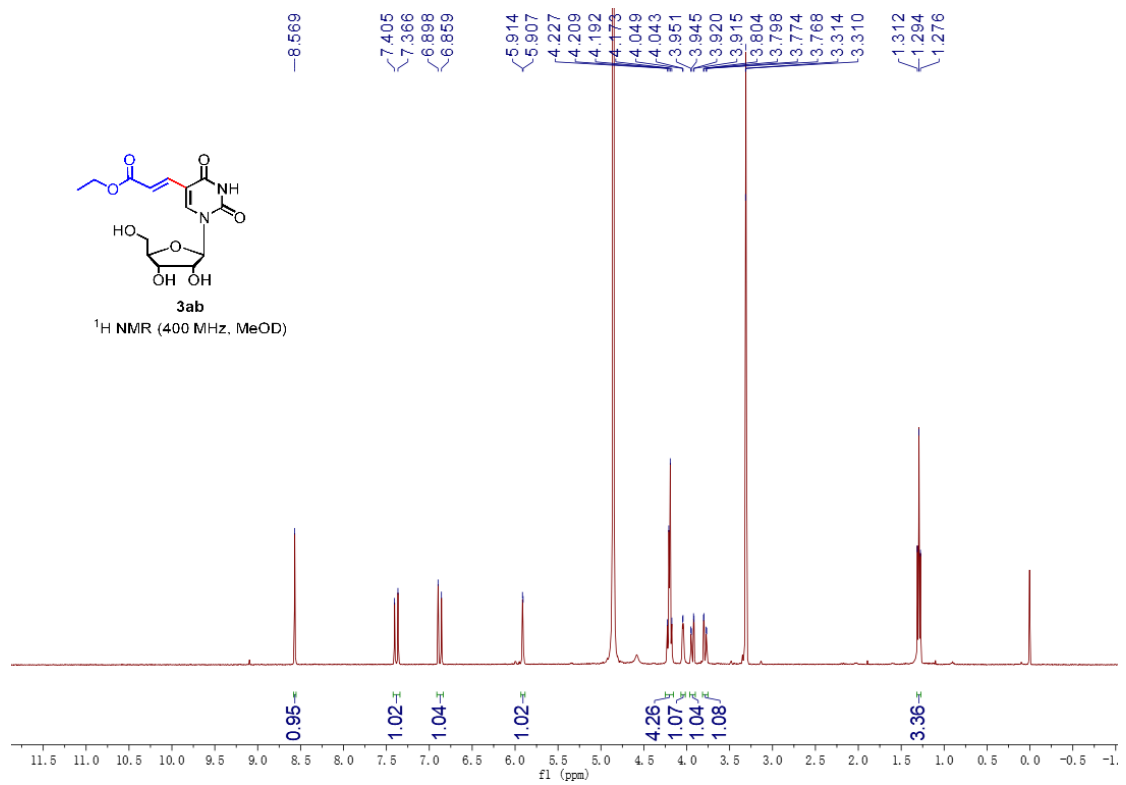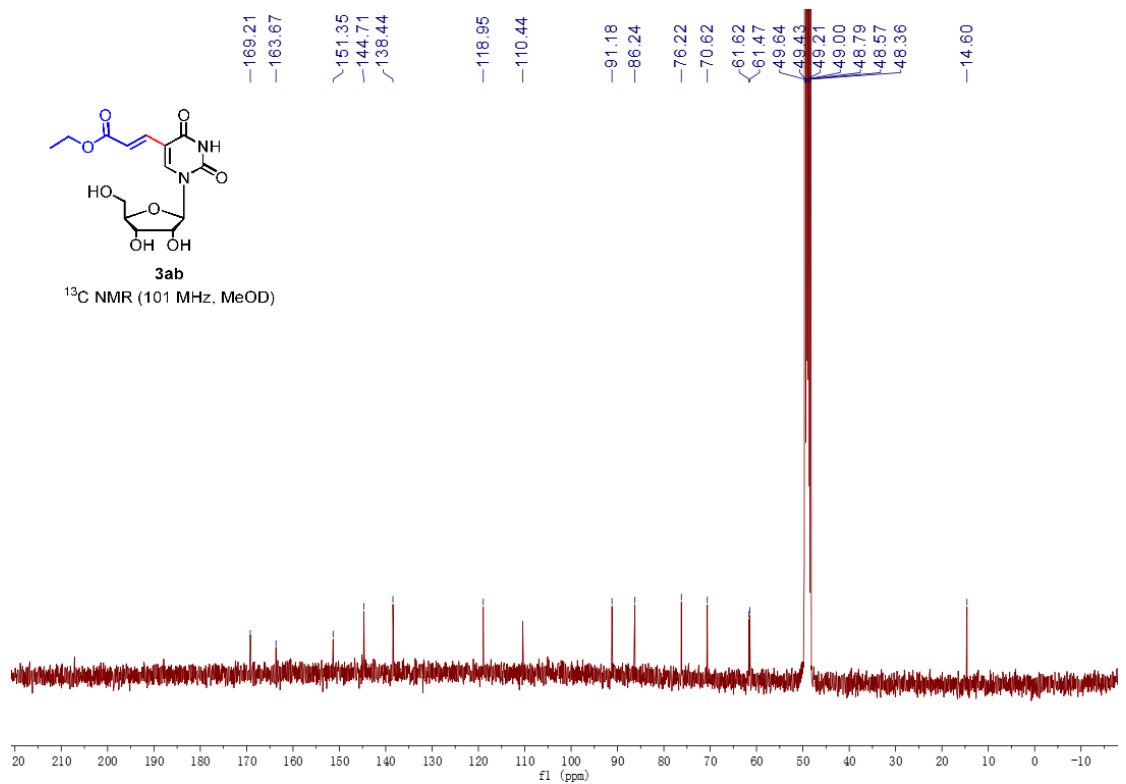

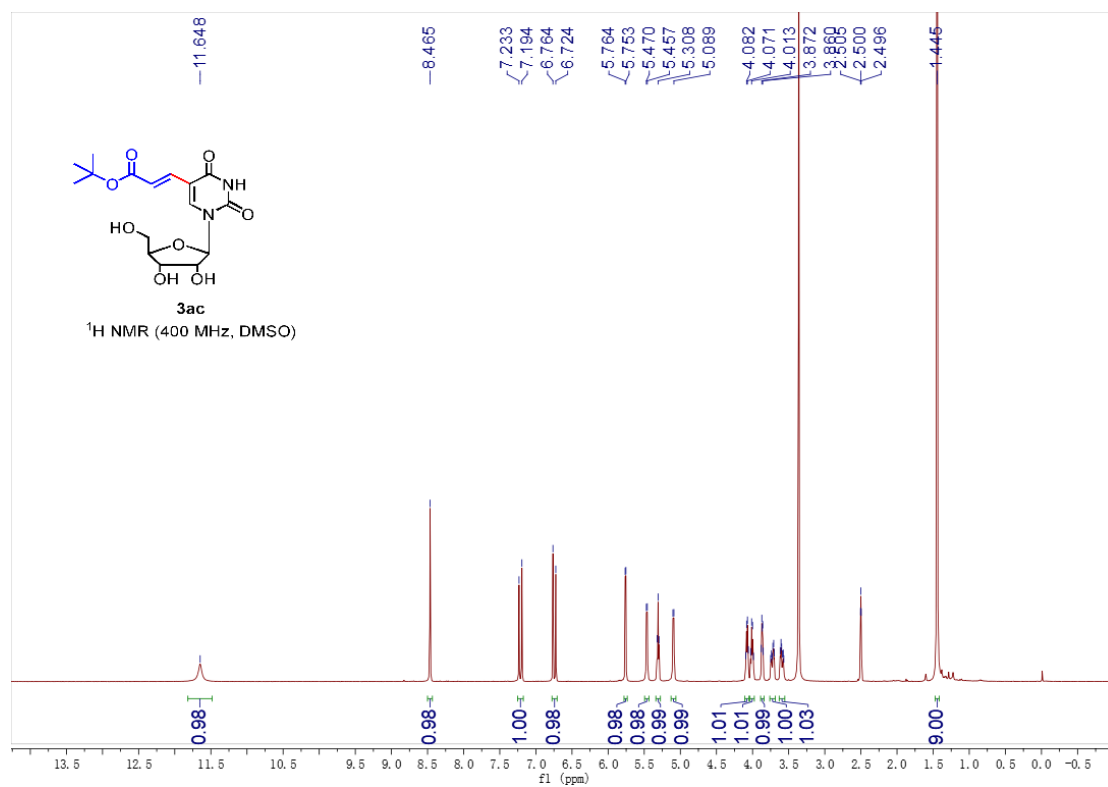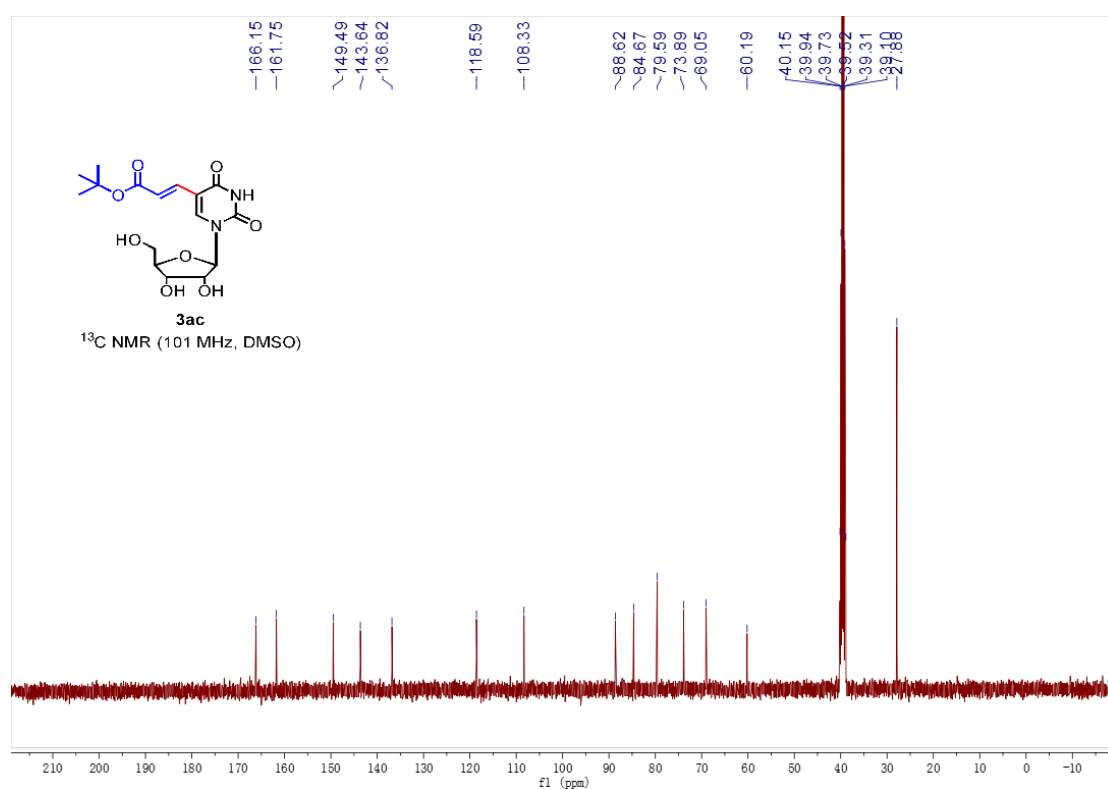

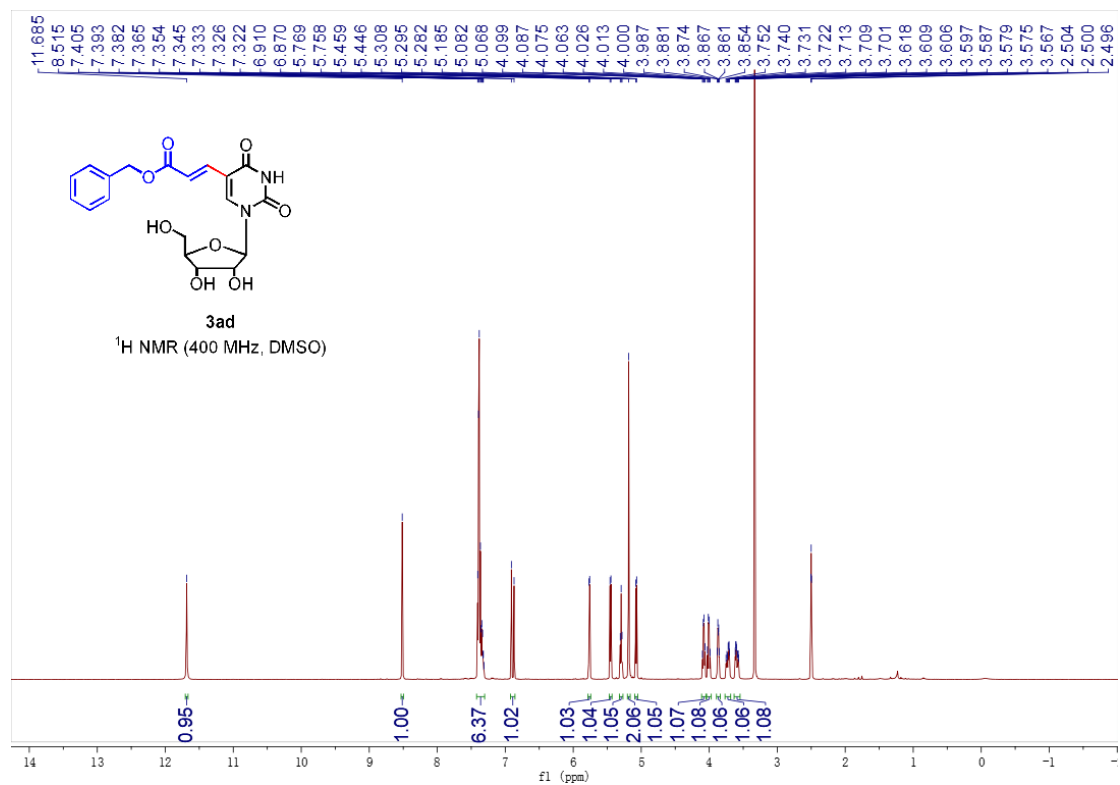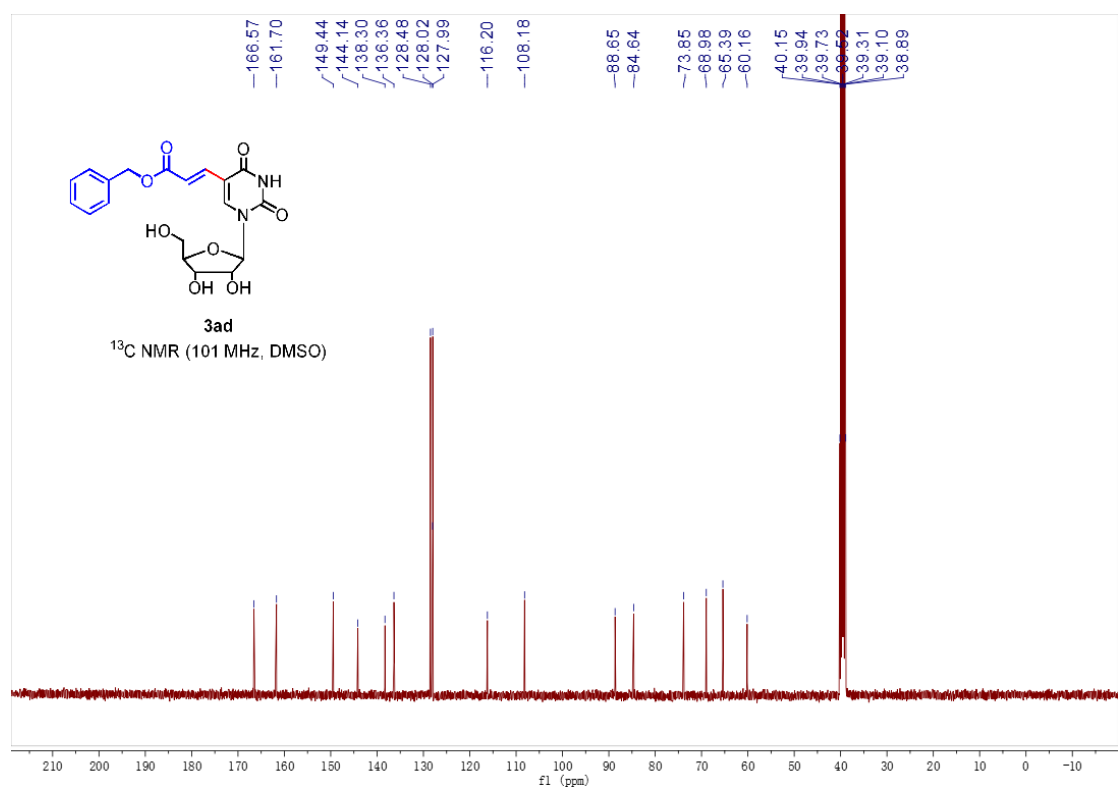

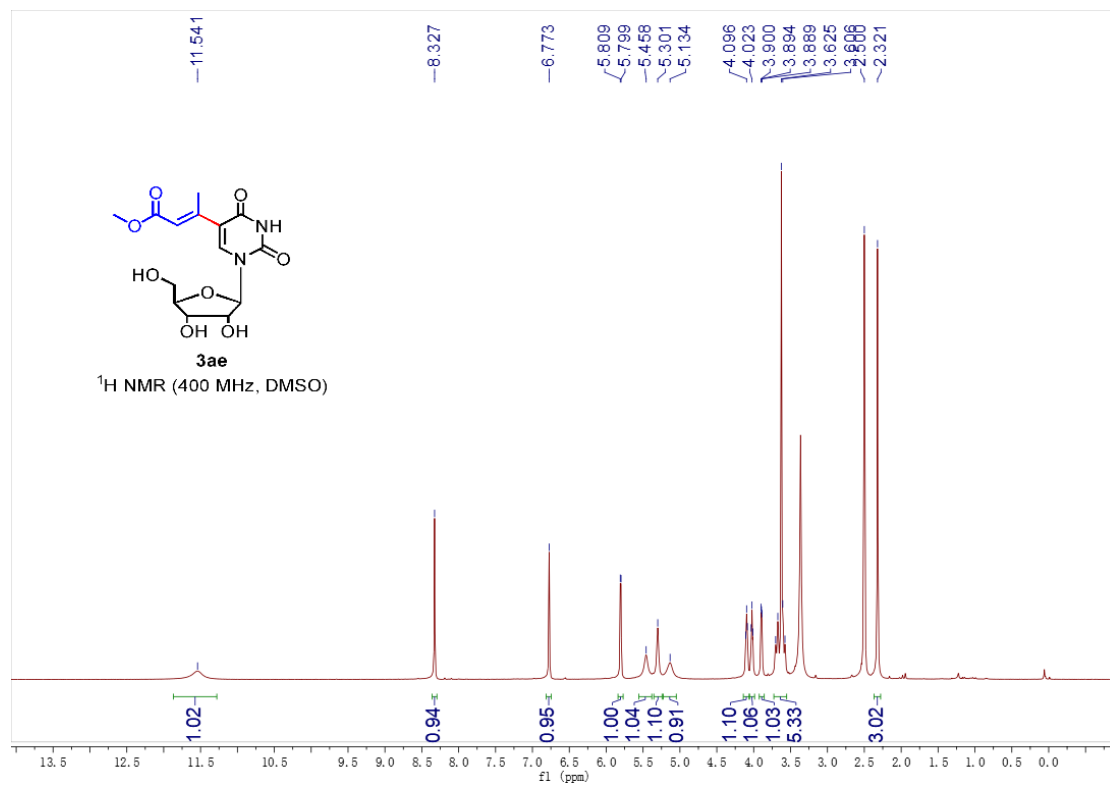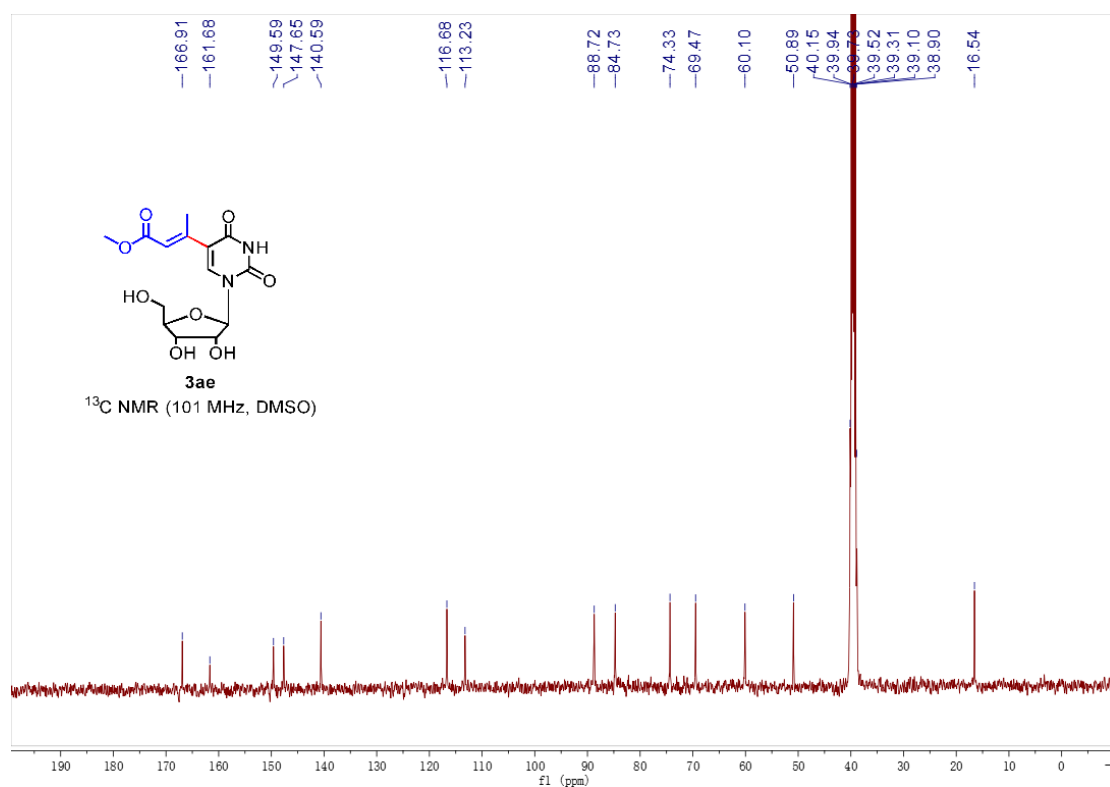



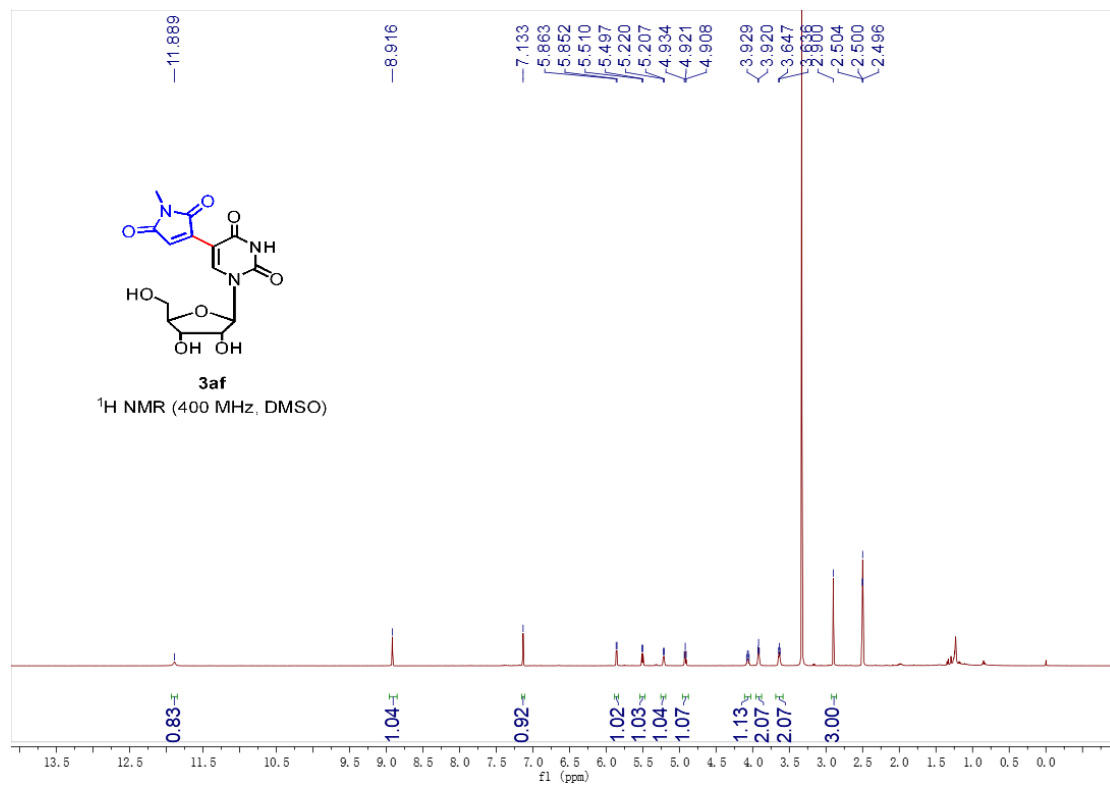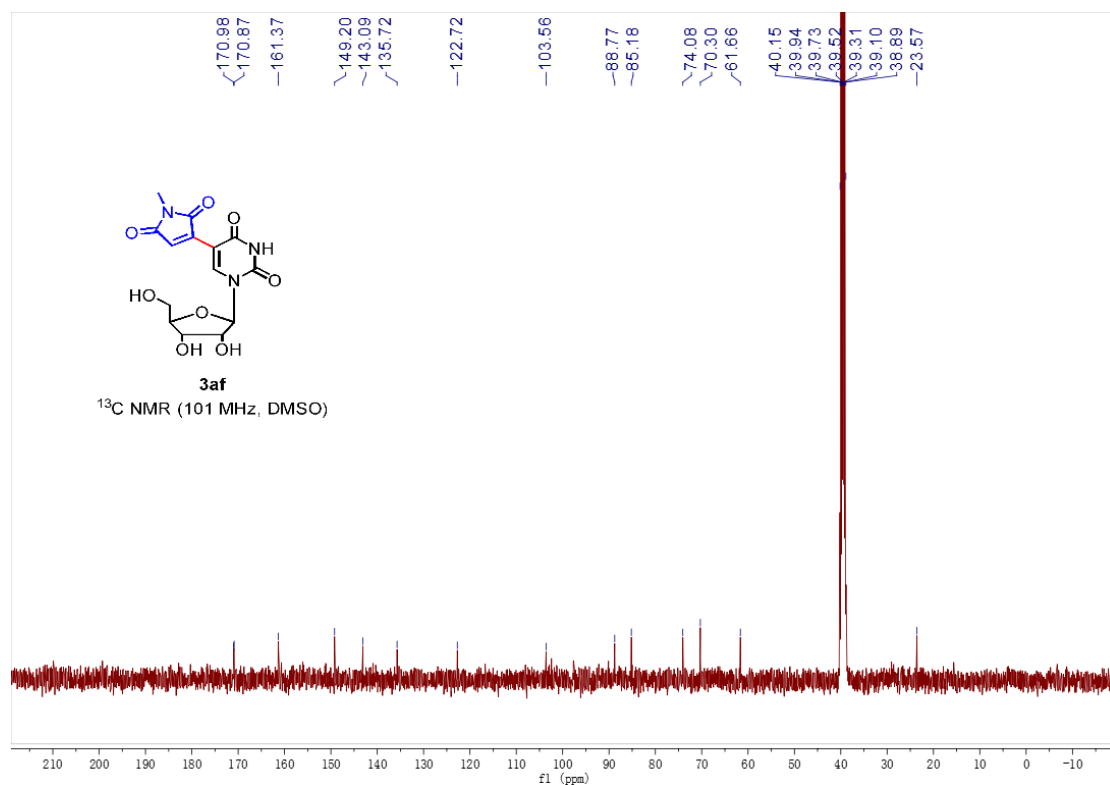

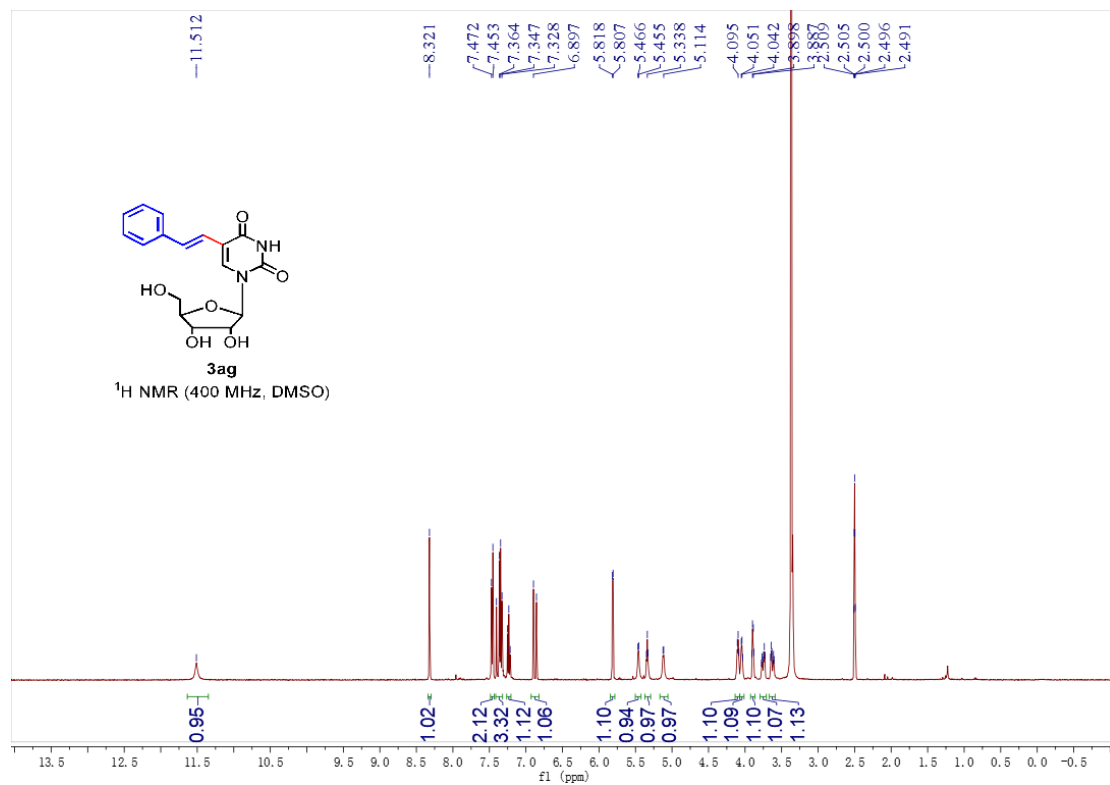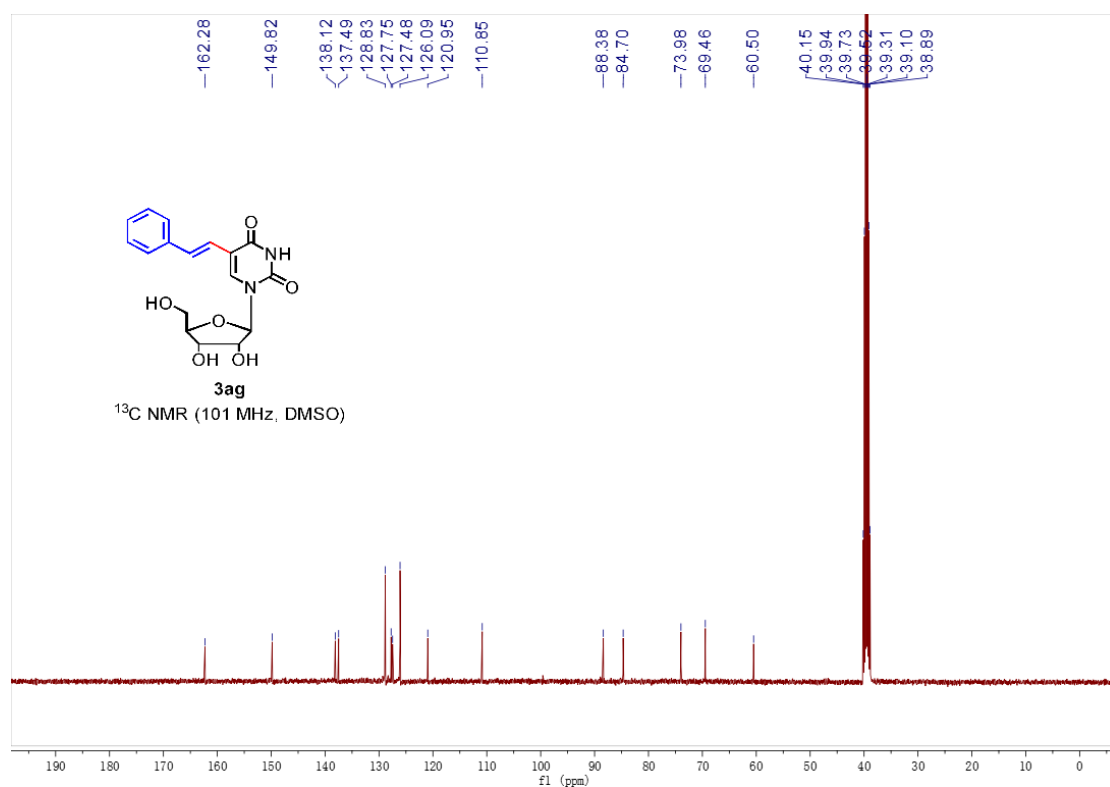

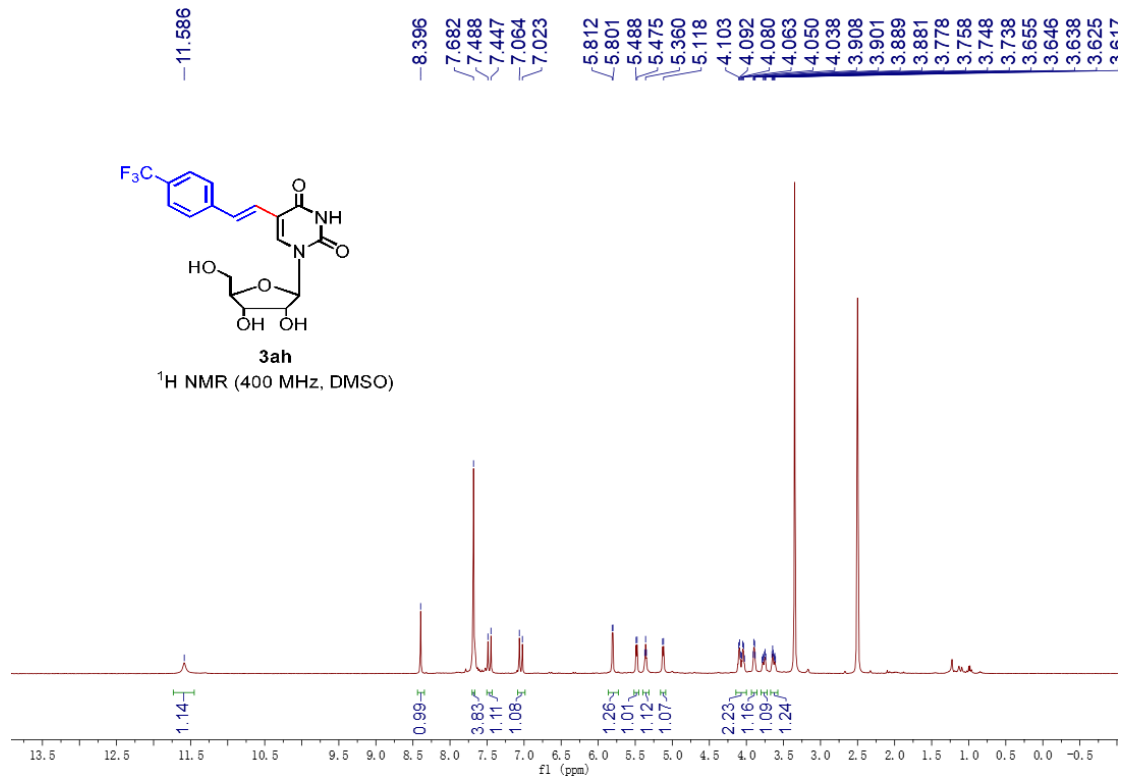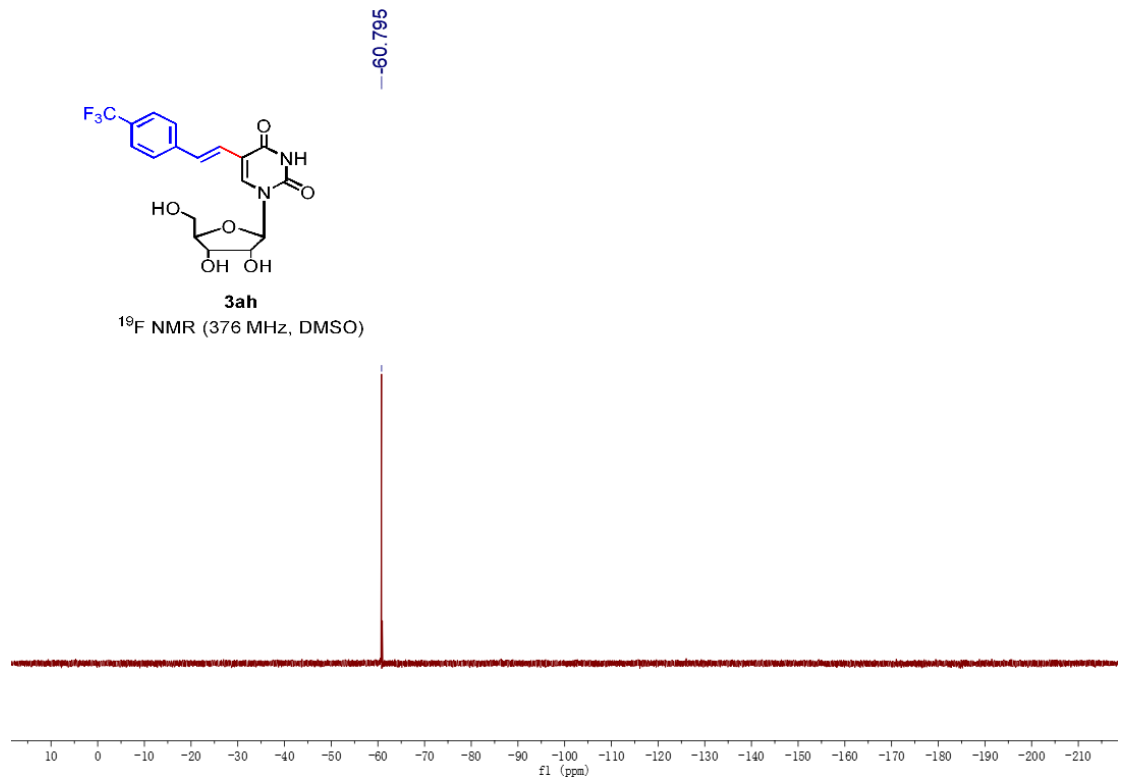

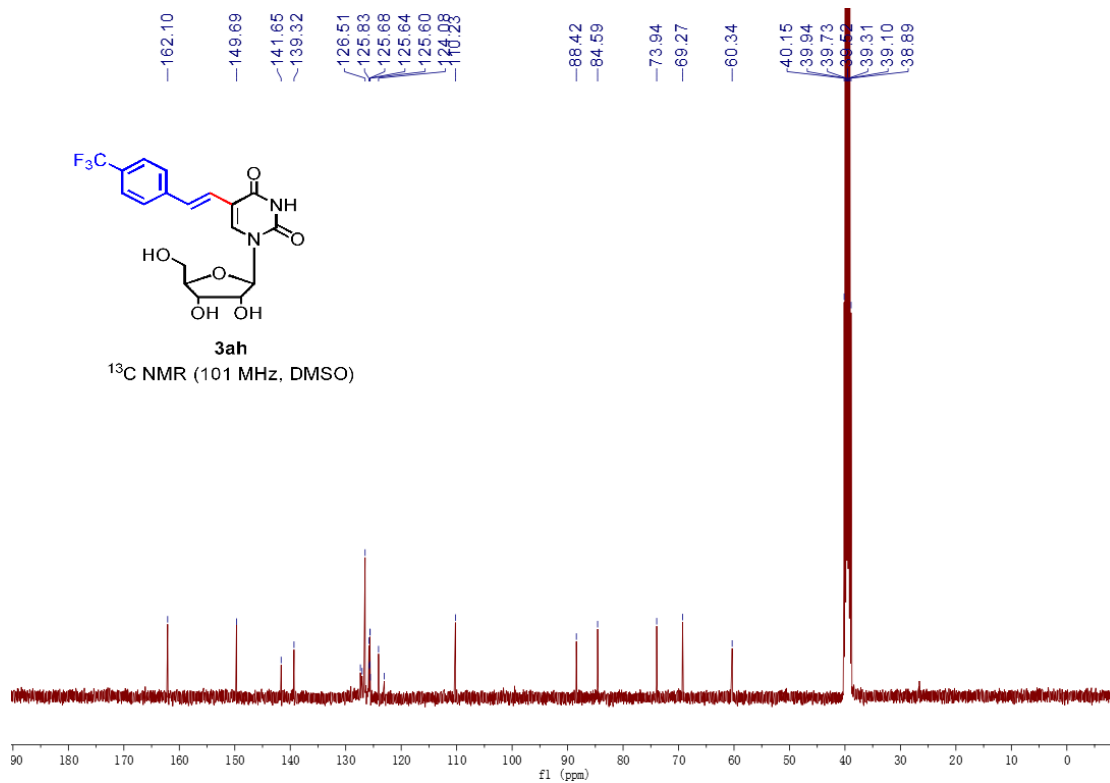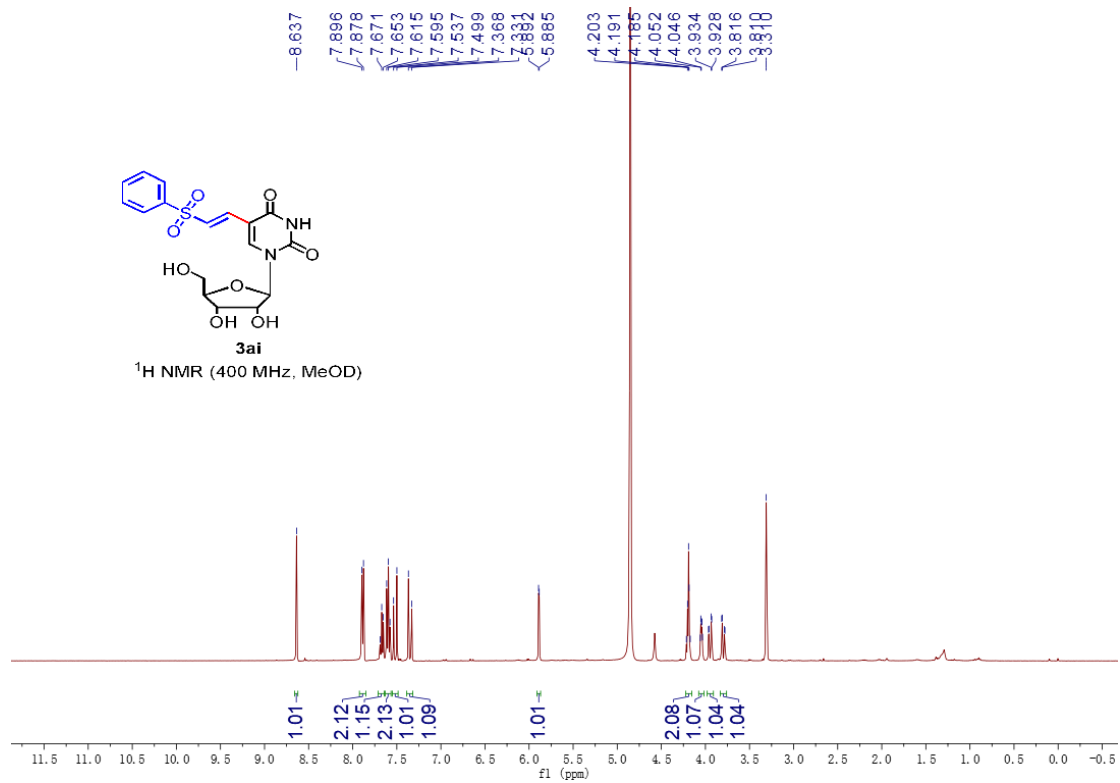

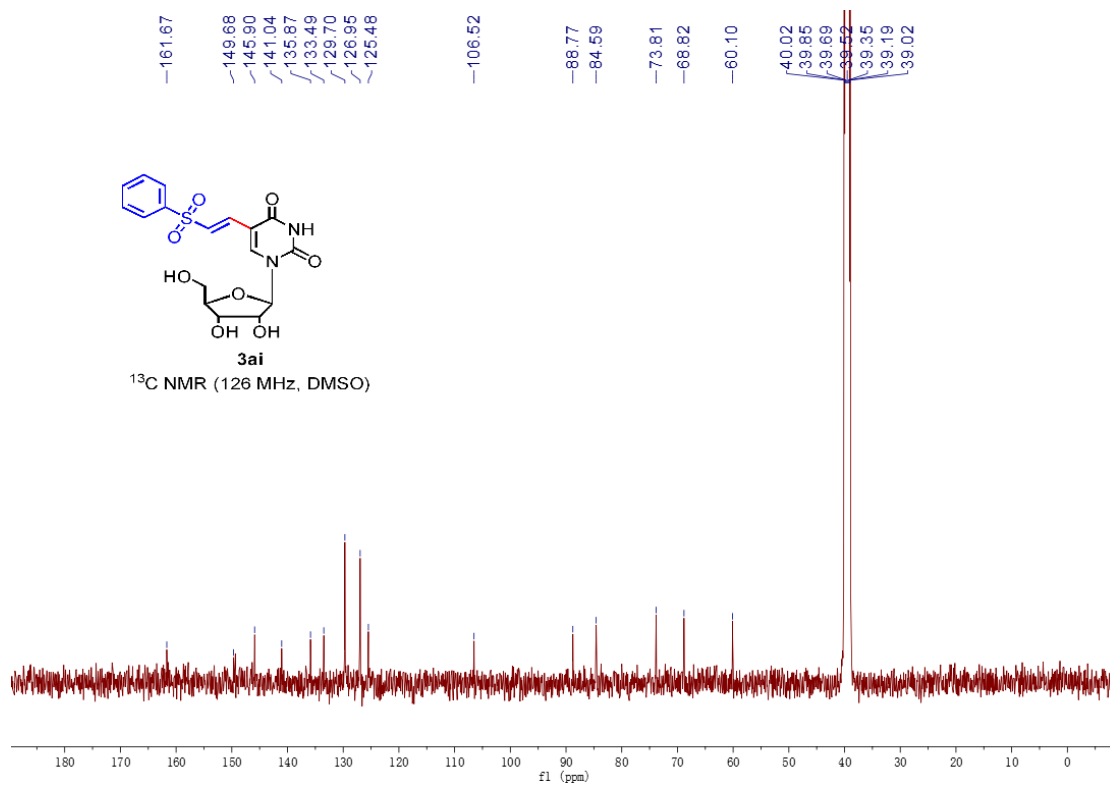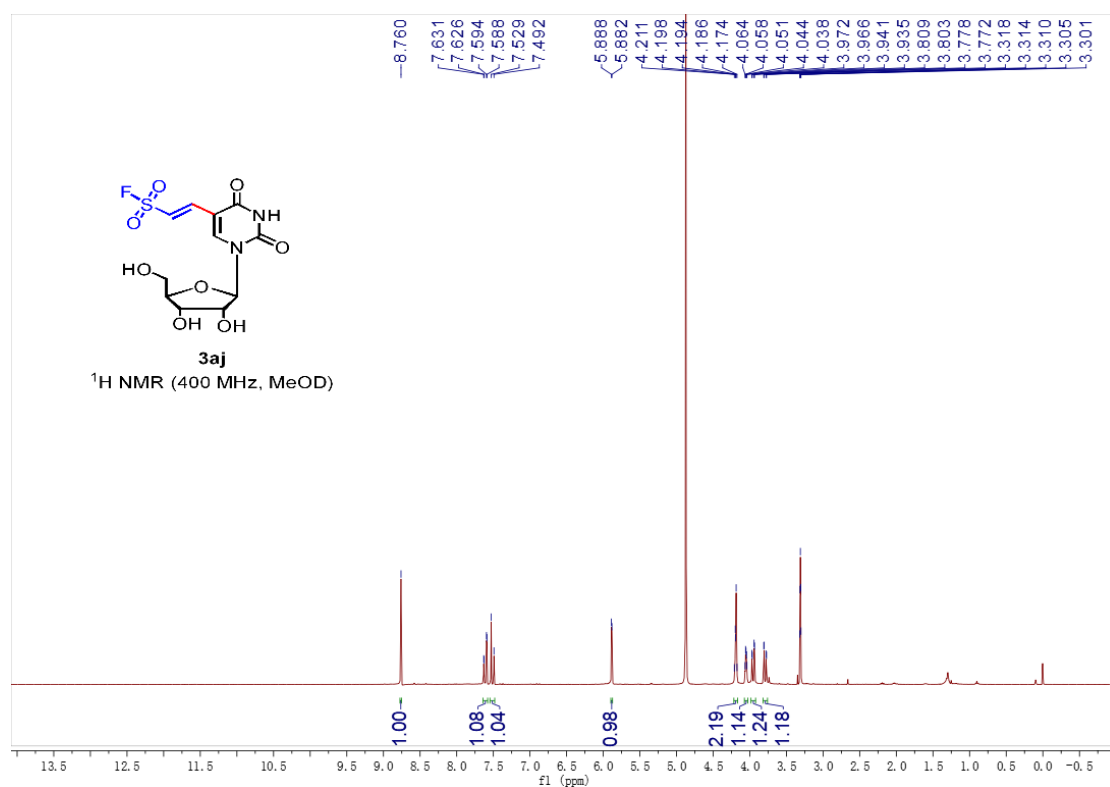

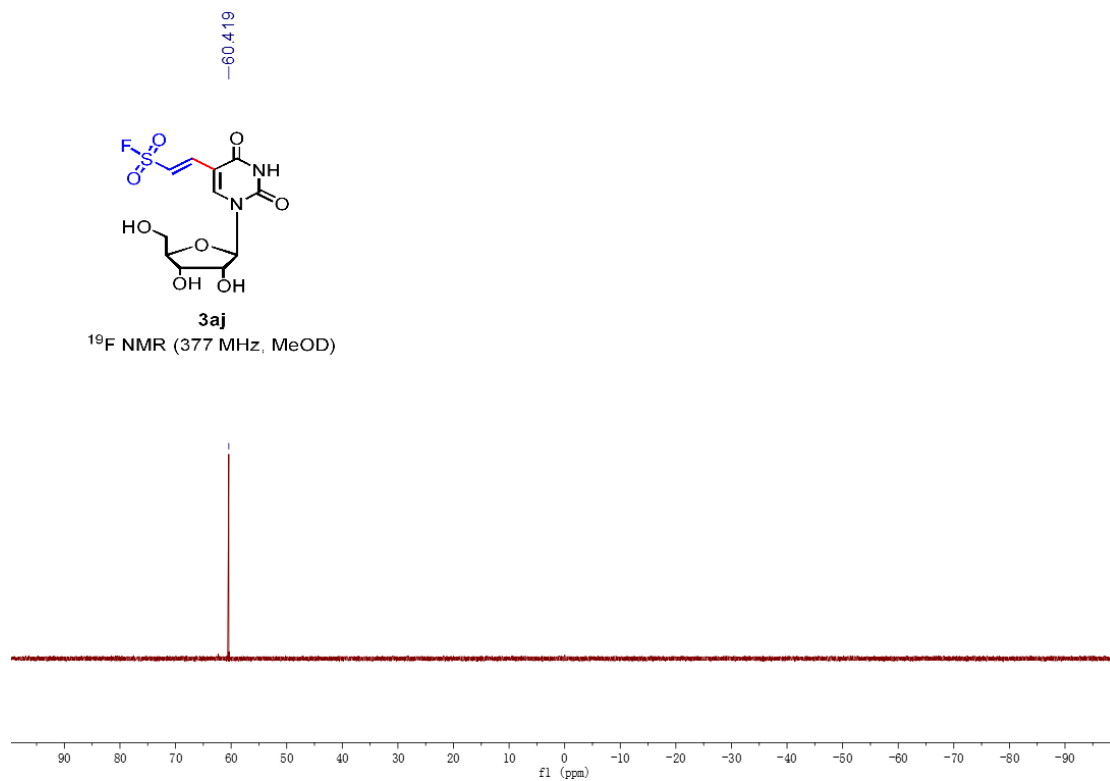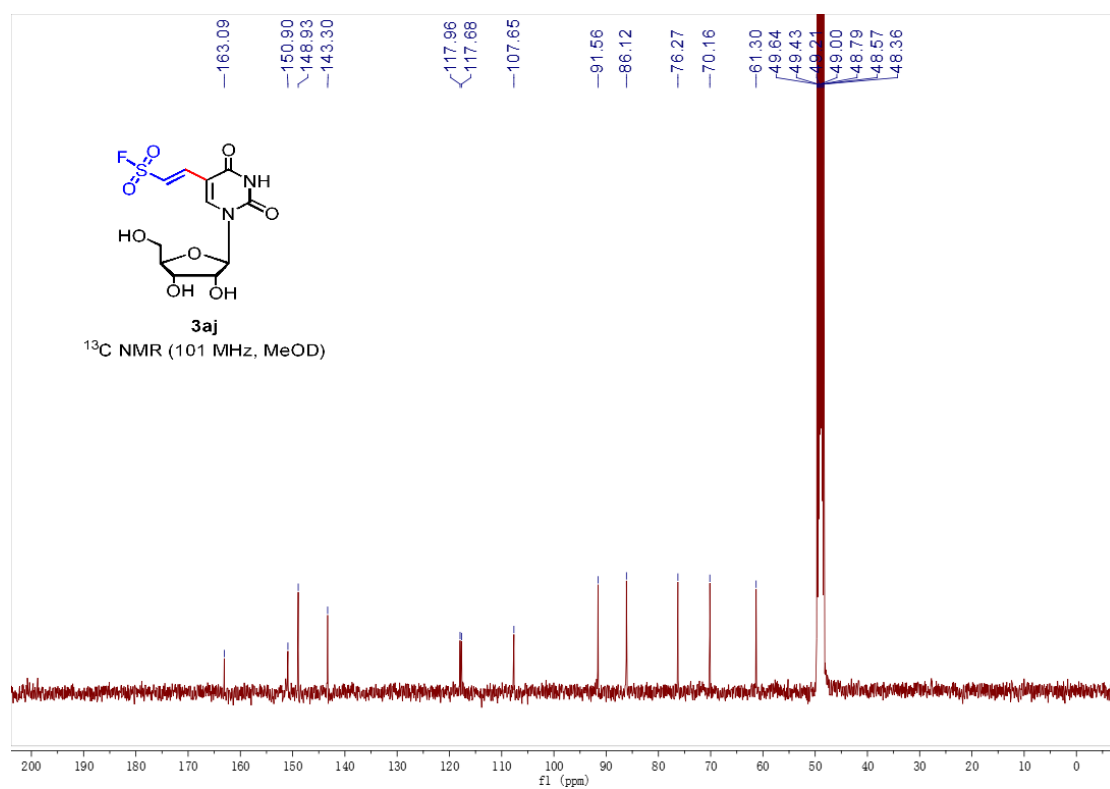

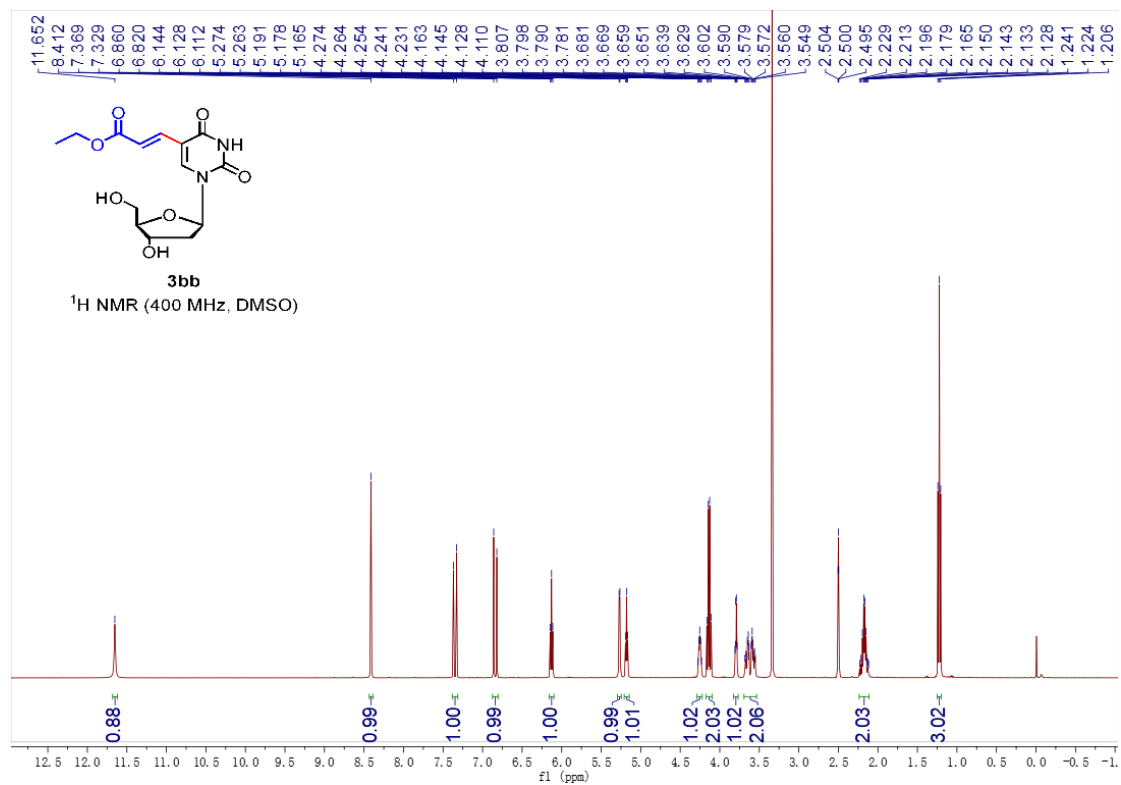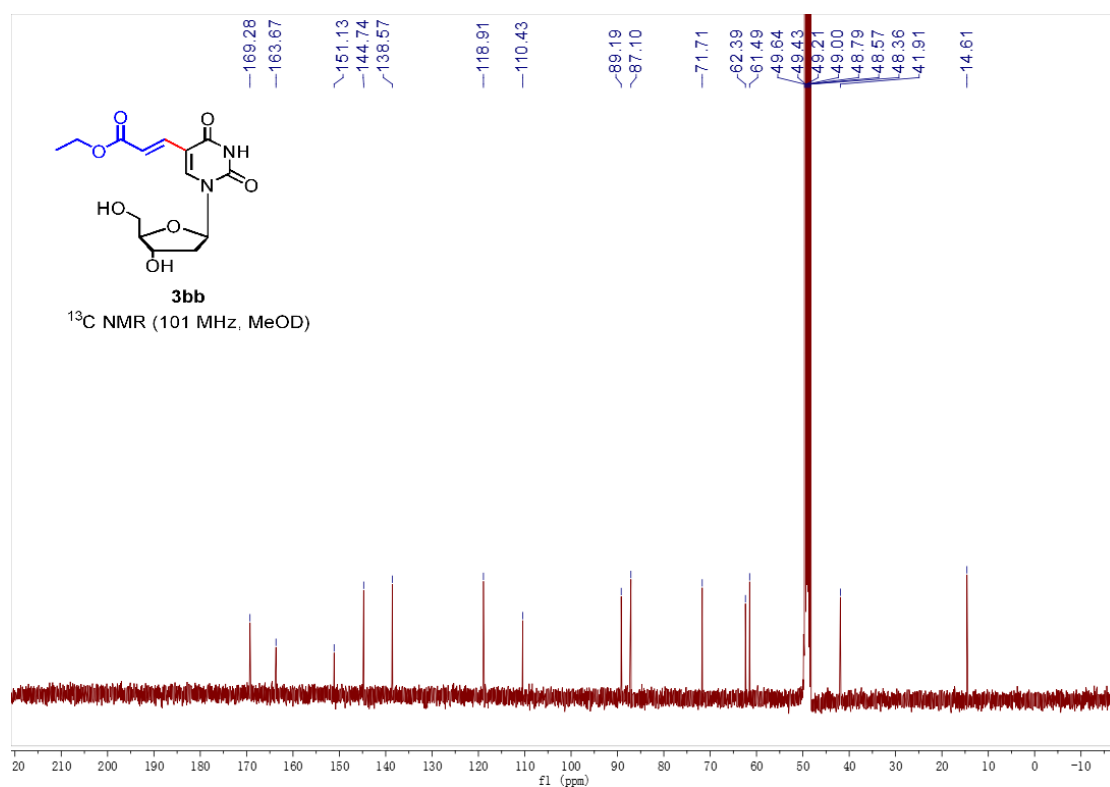

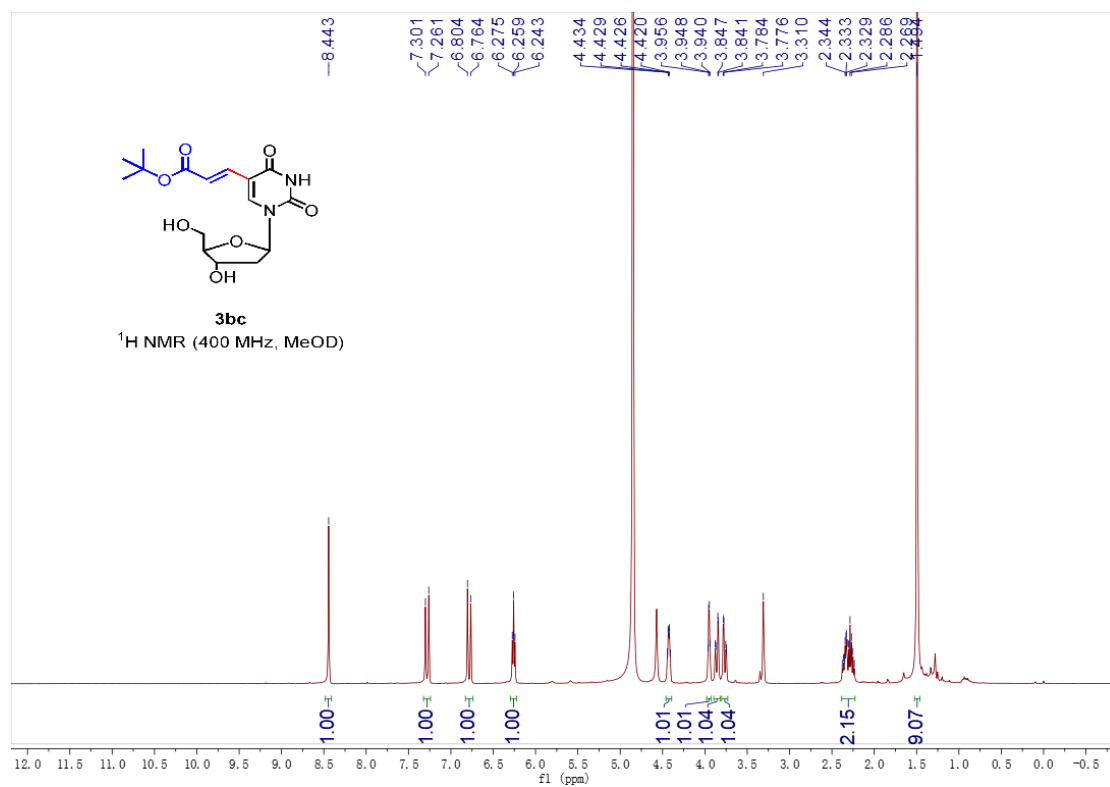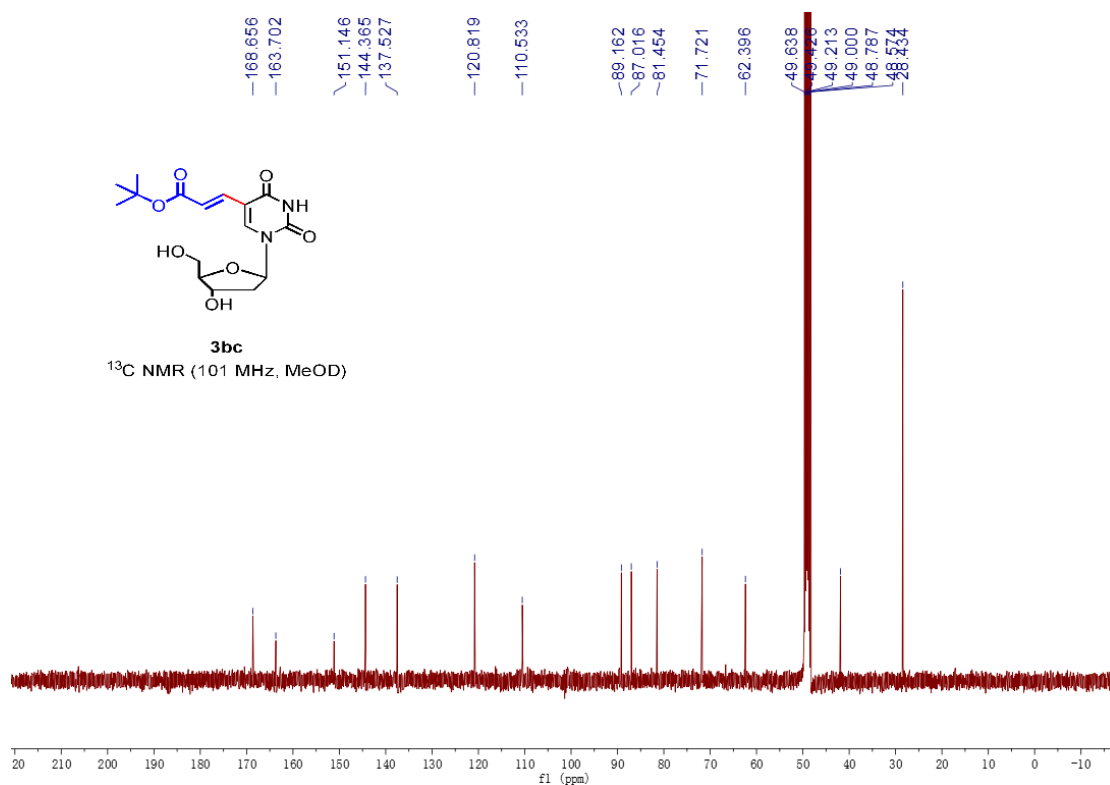



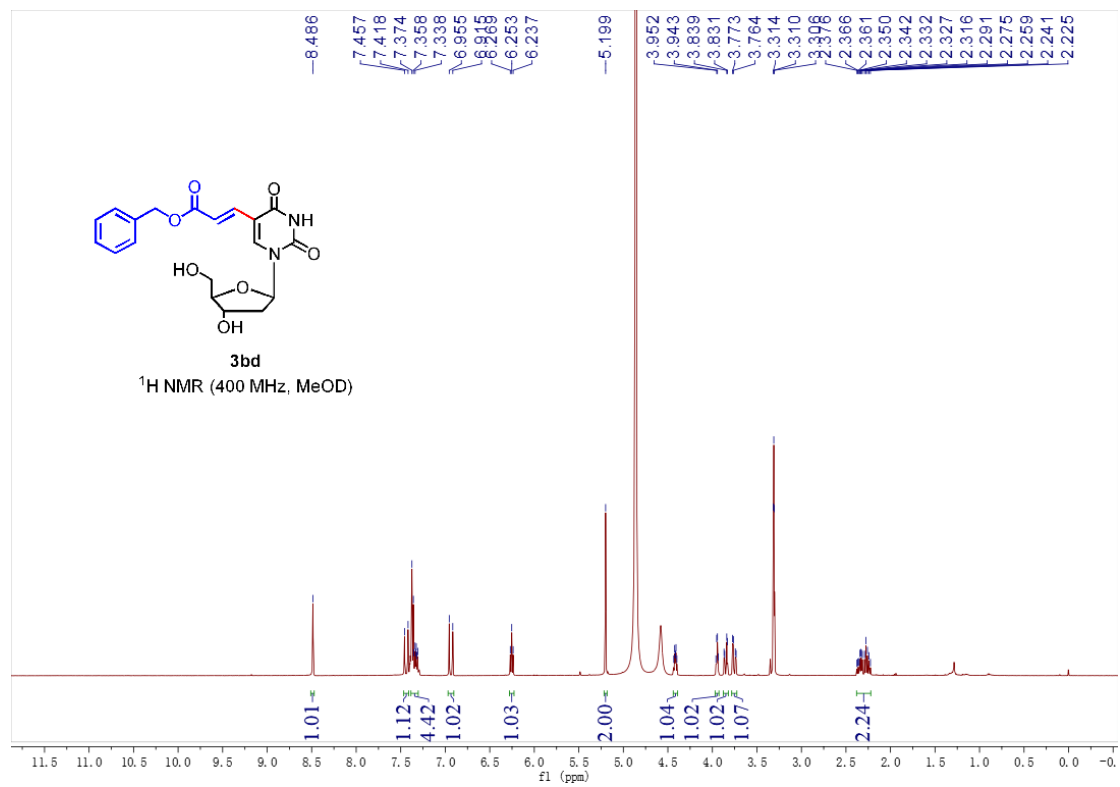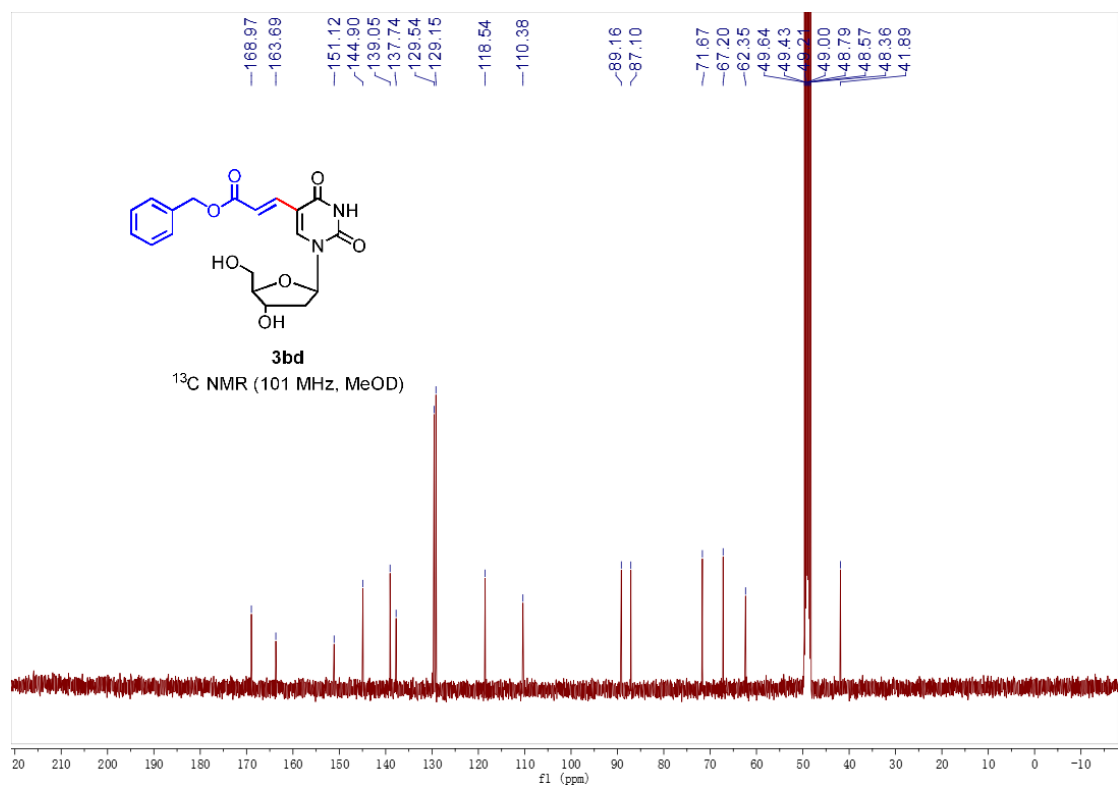

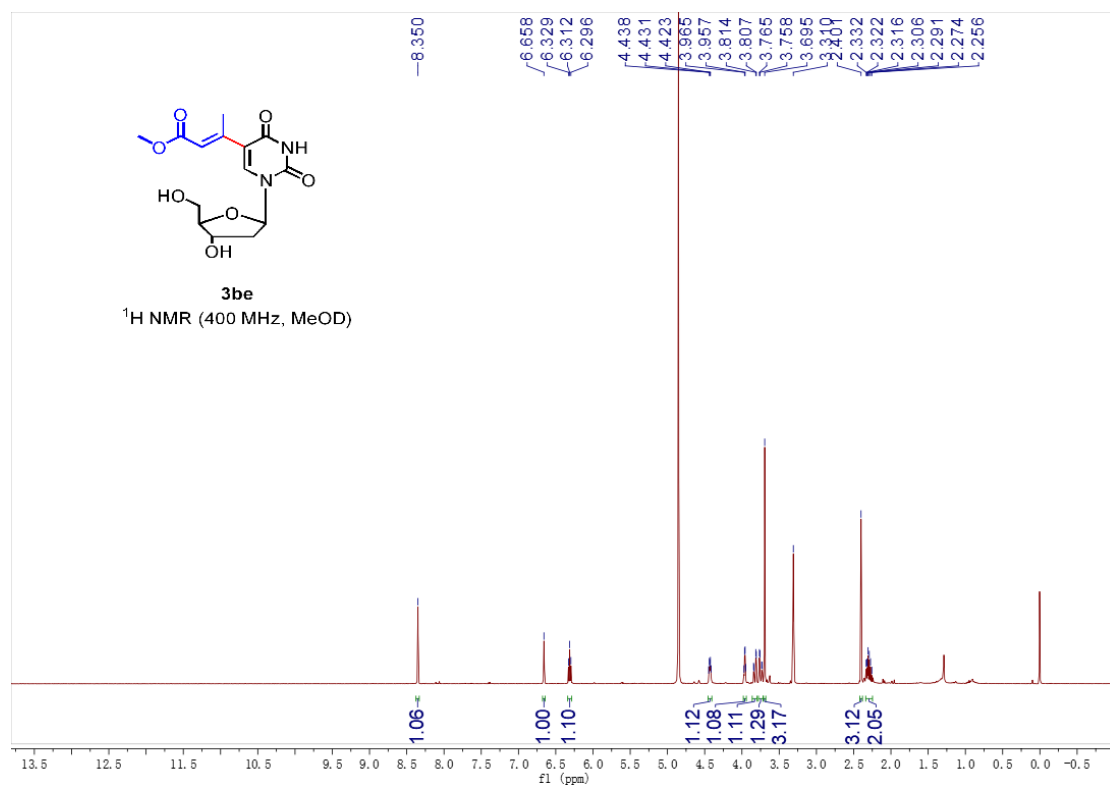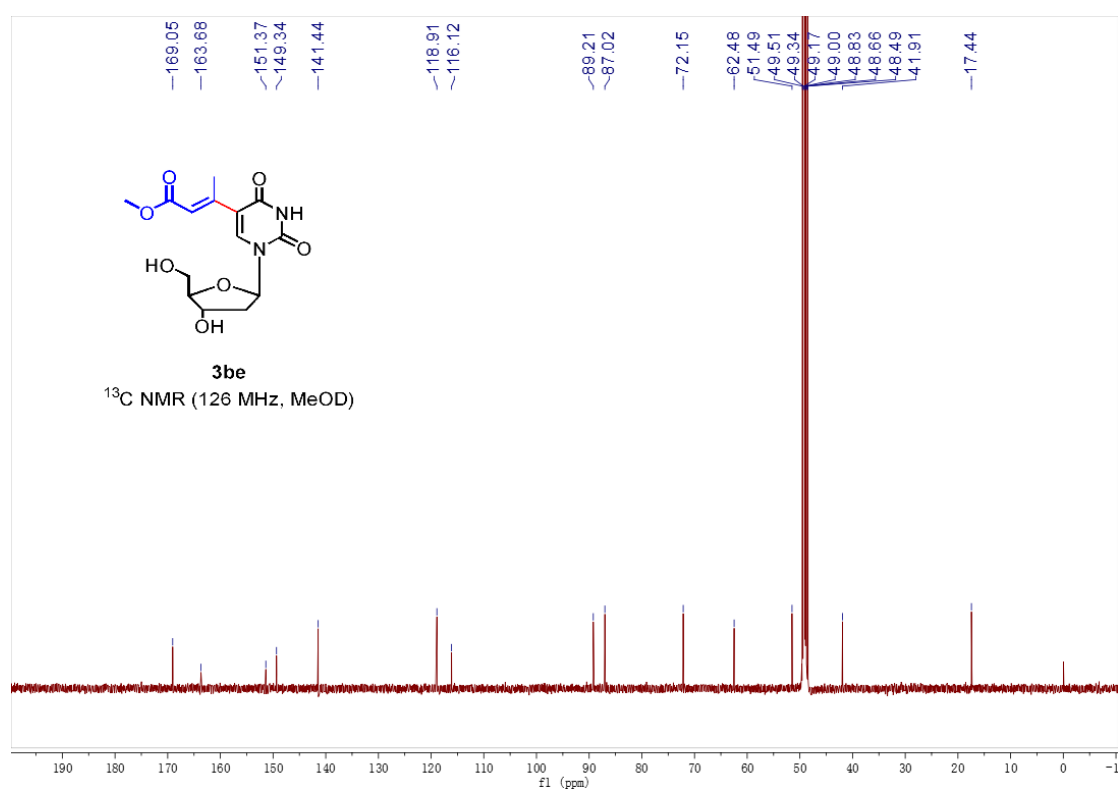

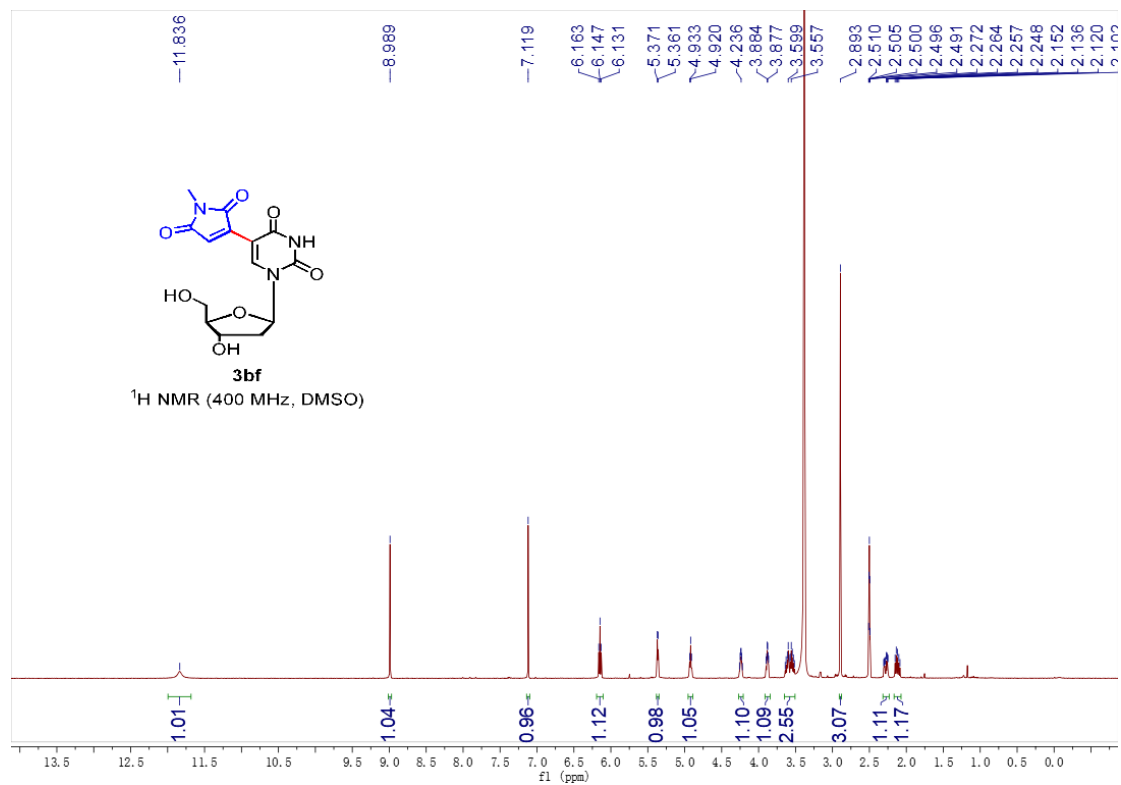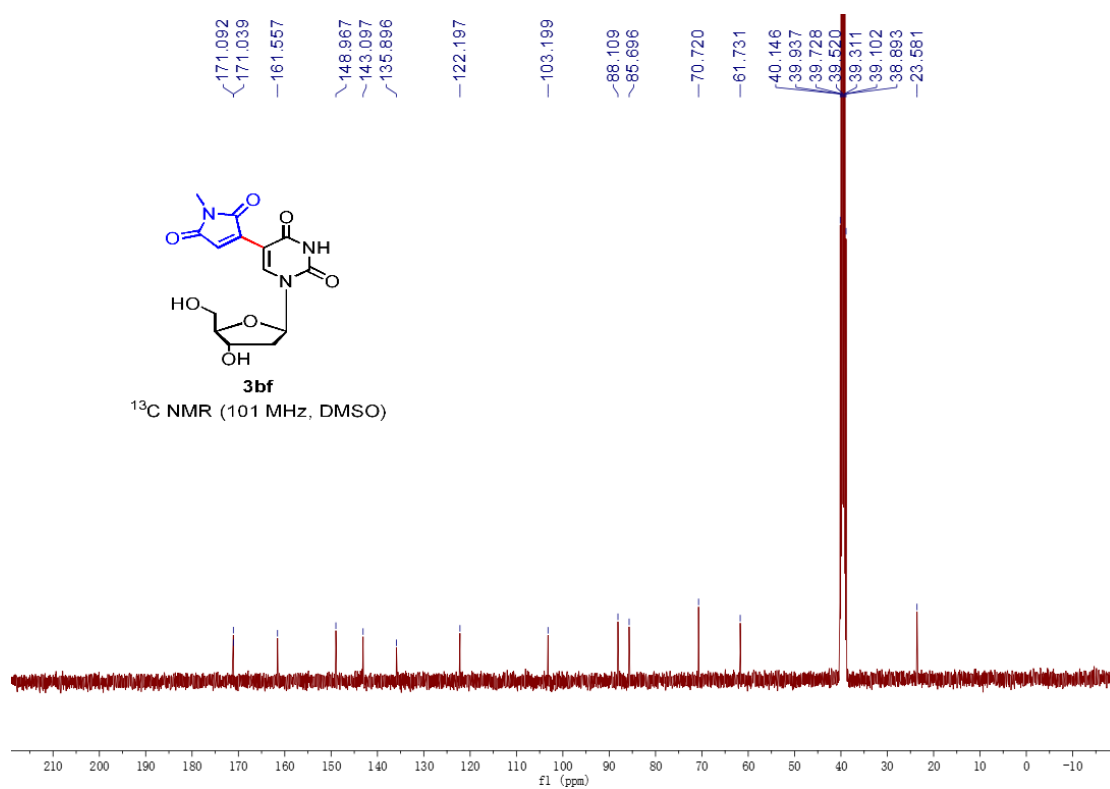

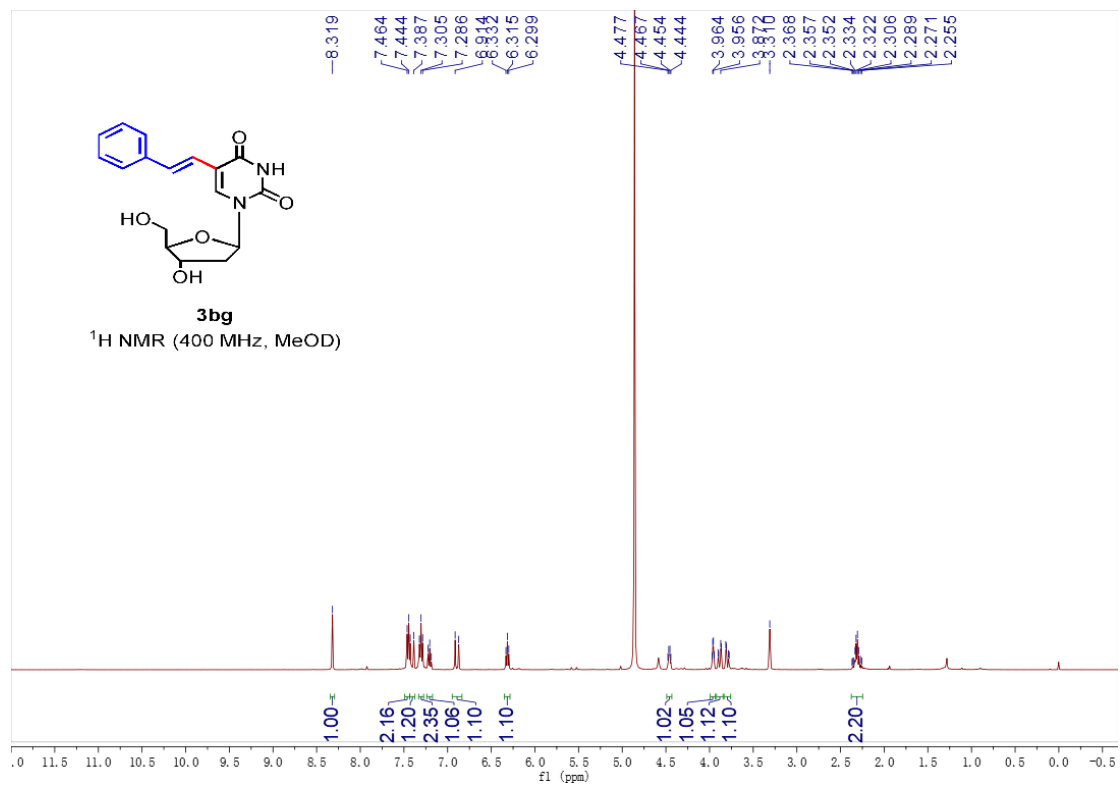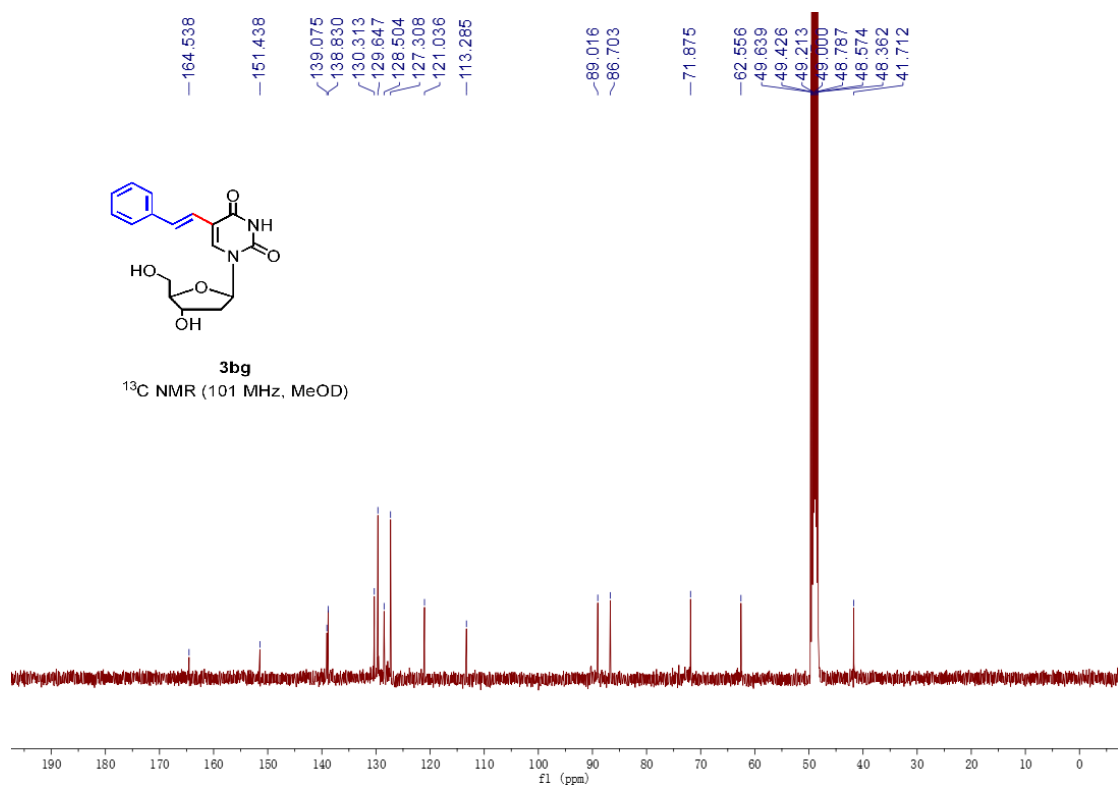

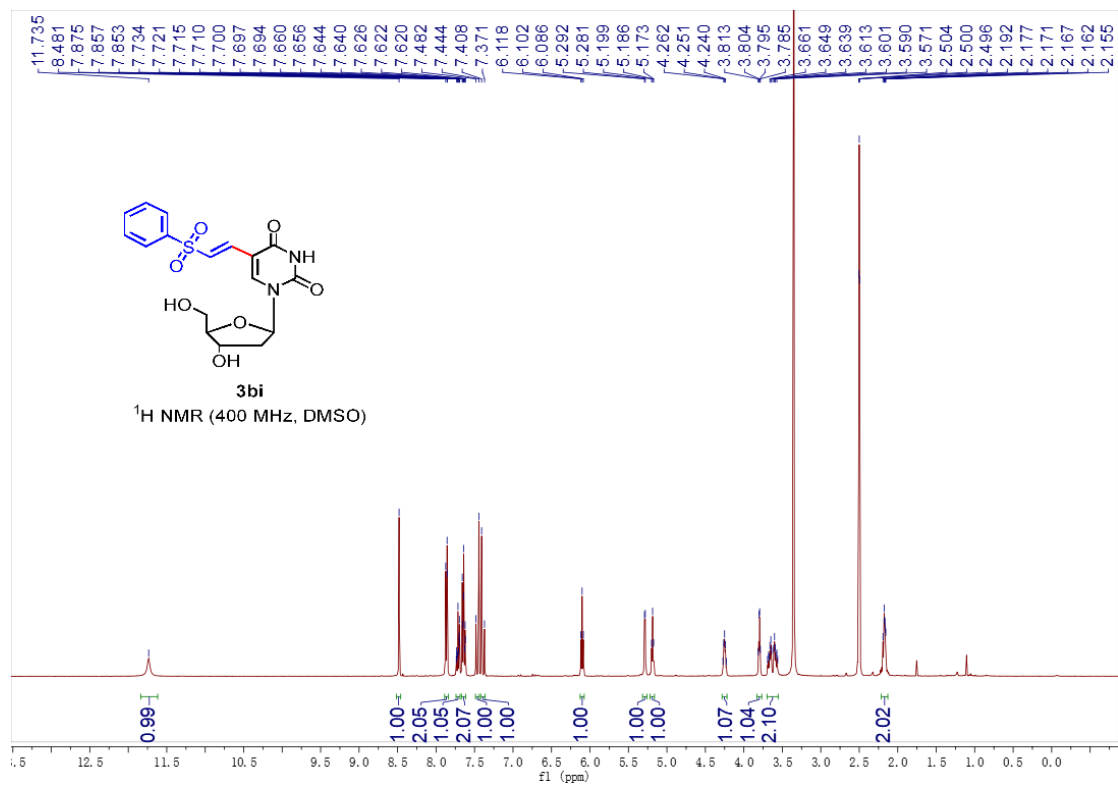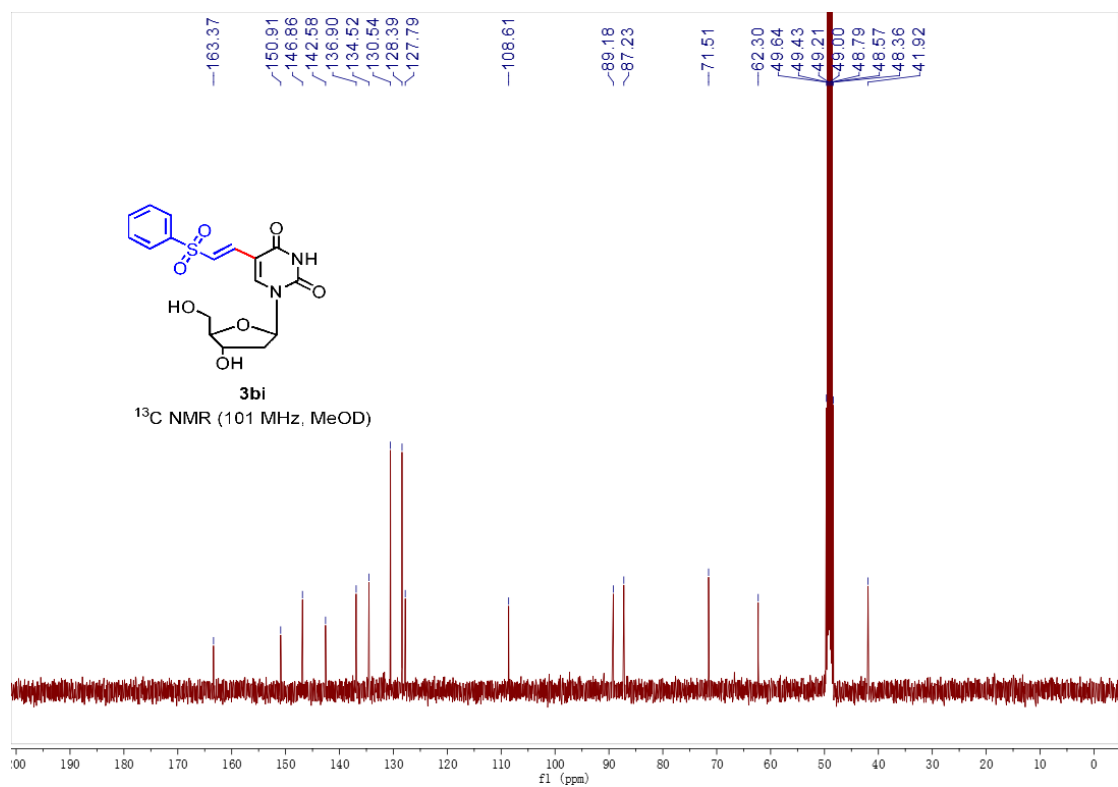

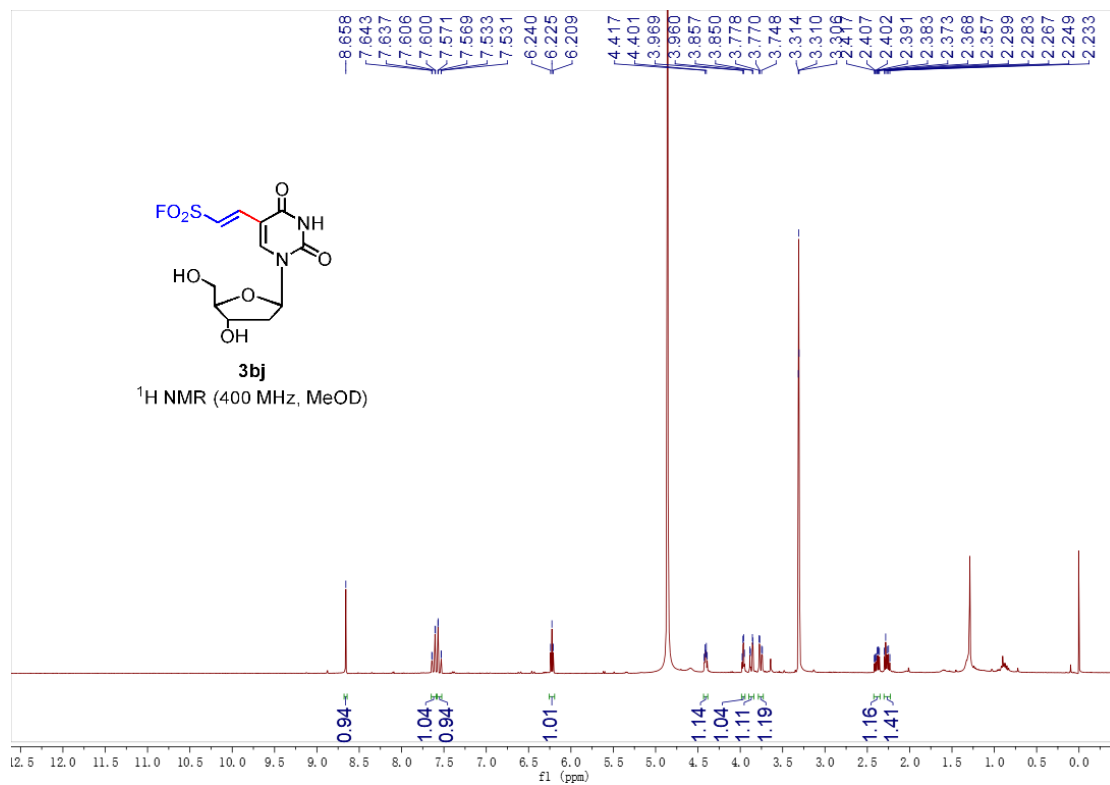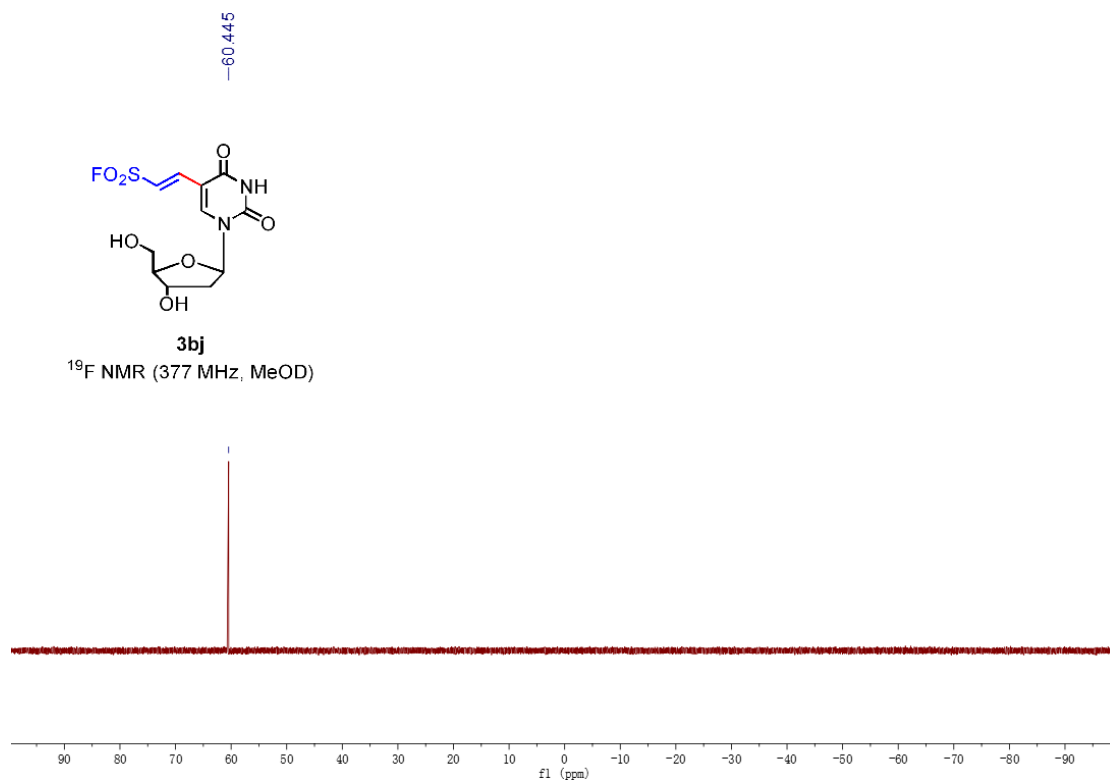

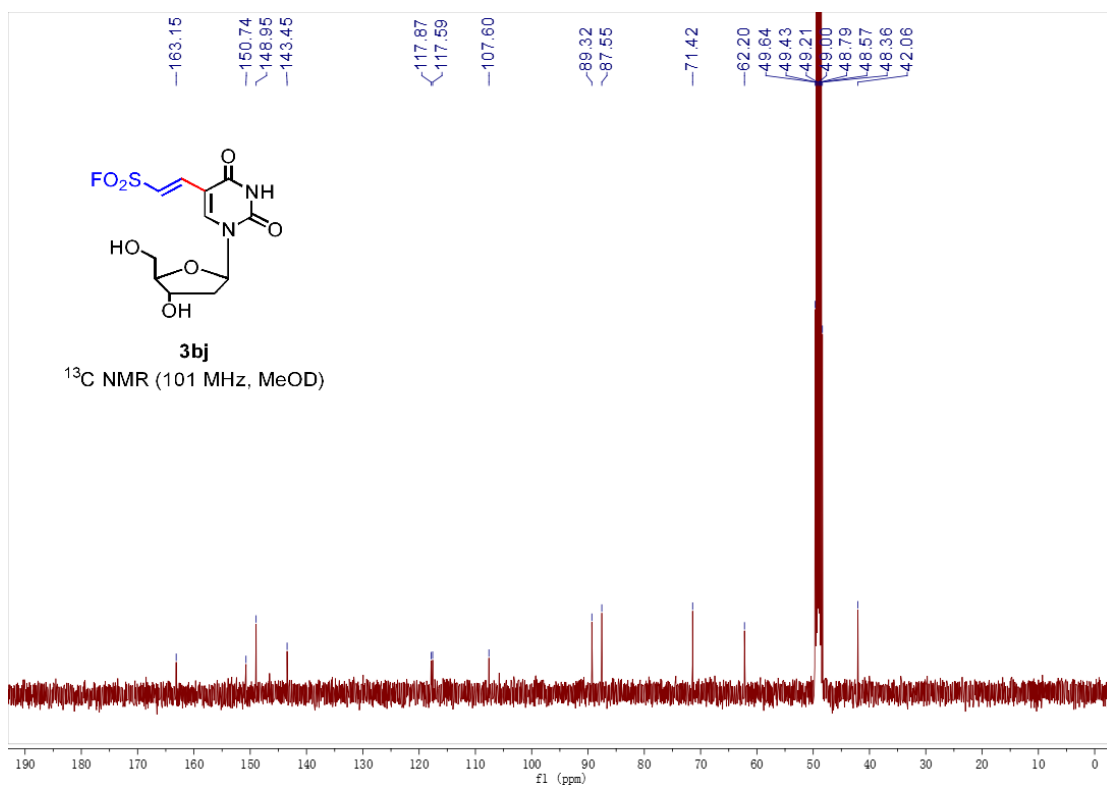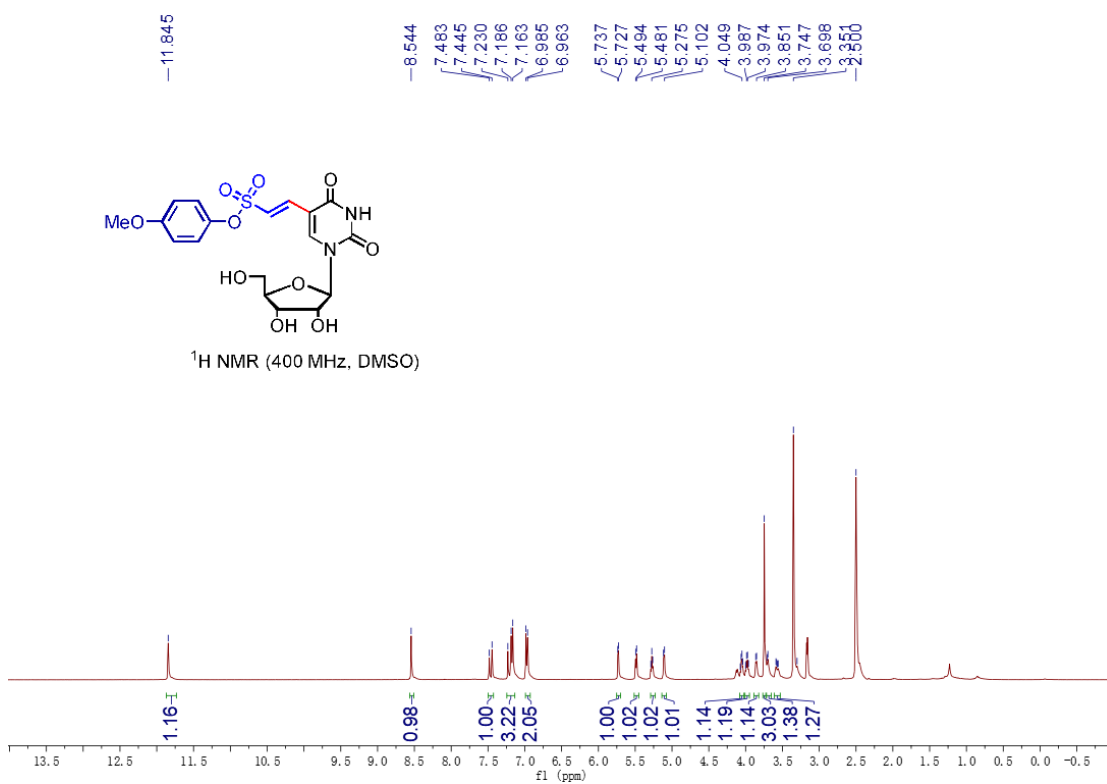

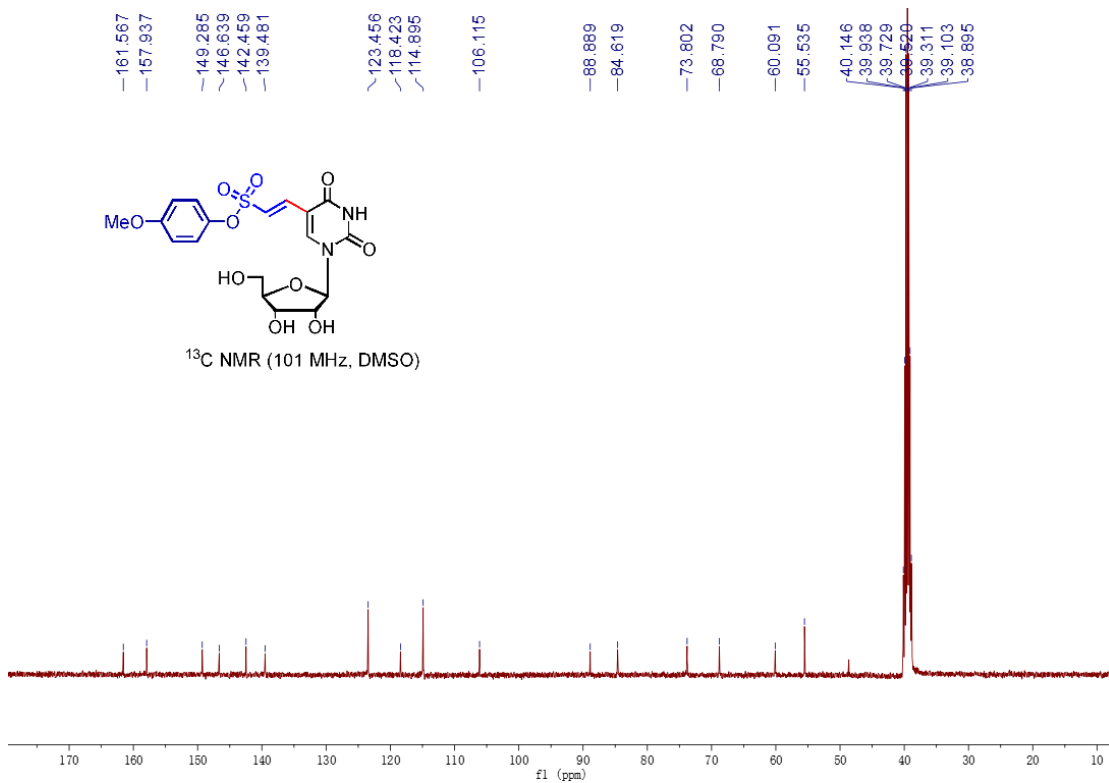

Supplement: d2ra03681a1.pdf [file d2ra03681a1.pdf]
